# Supplementary material for: RUNX1 marks a luminal castration-resistant lineage established at the onset of prostate development
Source: eLife journal article supplement (doi:10.7554/elife.60225), 2020-10-07
Supplement: supp [file elife-60225-supp-v1.zip]

Archive with 32 entries (32 files):
- elife_poa_e60225_Figure_1_figure_supplement_1.pdf
- elife_poa_e60225_Figure_1_figure_supplement_2.pdf
- elife_poa_e60225_Figure_1_figure_supplement_3.pdf
- elife_poa_e60225_Figure_2_figure_supplement_1.pdf
- elife_poa_e60225_Figure_3_figure_supplement_1.pdf
- elife_poa_e60225_Figure_3_figure_supplement_2.pdf
- elife_poa_e60225_Figure_3_figure_supplement_3.pdf
- elife_poa_e60225_Figure_3_figure_supplement_4.pdf
- elife_poa_e60225_Figure_4_figure_supplement_1.pdf
- elife_poa_e60225_Figure_5_figure_supplement_1.pdf
- elife_poa_e60225_Figure_5_figure_supplement_2.pdf
- elife_poa_e60225_Figure_6_figure_supplement_1.pdf
- elife_poa_e60225_Figure_6_figure_supplement_2.pdf
- elife_poa_e60225_Figure_7_figure_supplement_1.pdf
- elife_poa_e60225_Supplementary_file_1.xlsx
- elife_poa_e60225_Supplementary_file_2.xlsx
- elife_poa_e60225_Supplementary_file_3.xlsx
- elife_poa_e60225_Supplementary_file_4.xlsx
- elife_poa_e60225_Supplementary_file_5.xlsx
- elife_poa_e60225_Figure_1_figure_supplement_1_source_data_1.xlsx
- elife_poa_e60225_Figure_1_figure_supplement_2_source_data_1.xlsx
- elife_poa_e60225_Figure_1_figure_supplement_3_source_data_1.xlsx
- elife_poa_e60225_Figure_1_source_data_1.xlsx
- elife_poa_e60225_Figure_2_figure_supplement_1_source_data_1.xlsx
- elife_poa_e60225_Figure_2_source_data_1.xlsx
- elife_poa_e60225_Figure_4_figure_supplement_1_source_data_1.xlsx
- elife_poa_e60225_Figure_4_source_data_1.xlsx
- elife_poa_e60225_Figure_5_figure_supplement_2_source_data_1.xlsx
- elife_poa_e60225_Figure_5_source_data_1.xlsx
- elife_poa_e60225_Figure_7_figure_supplement_1_source_data_1.xlsx
- elife_poa_e60225_Figure_7_source_data_1.xlsx
- elife_poa_e60225_Transparent_Reporting_File.docx
