# Supplementary material for: RUNX1 marks a luminal castration-resistant lineage established at the onset of prostate development
Source: eLife journal article supplement (doi:10.7554/elife.60225), 2020-10-07
Supplement: supp [file elife-60225-supp-v1.zip › elife_poa_e60225_Figure_1_figure_supplement_1_source_data_1.xlsx]

## Sheet: Figure 1-Figure supplement 1B
Figure 1-Figure supplement 1B		Double Positive								NKX3.1-high								RUNX1-high								Double Negative
	Proximal DLP	4.38267	3.43719	1.83173						35.8127	43.6696	38.0938						33.8342	20.8704	29.3698						25.9704	32.0227	30.7048
	Distal DLP	1.27482	3.565	1.3567	1.18338	0.579019	0.101913	2.3507	2.45792	67.2362	70.1039	68.6911	68.2432	66.0218	33.7488	48.9881	85.0655	2.69592	3.43726	3.44639	2.72417	1.52589	0.603638	3.84682	1.06866	28.7931	22.8938	26.5058	27.8493	31.8733	65.5456	44.8143	11.408
	Proximal VP	17.9227	39.2636	1.0296						4.2029	3.99134	0.19305						67.2464	47.4629	63.7709						10.628	9.28218	35.0064
	Distal VP	30.5933	41.6507	17.6096	6.52965	1.37601	1.18439	16.5038	29.6534	36.518	21.0975	54.5767	46.5699	13.583	30.8982	27.1851	54.296	15.6864	28.3903	7.78945	16.3122	11.4613	3.98901	28.1488	5.05996	17.2023	8.86157	20.0242	30.5883	73.5797	63.9284	28.1623	10.9906
