# Supplementary material for: RUNX1 marks a luminal castration-resistant lineage established at the onset of prostate development
Source: eLife journal article supplement (doi:10.7554/elife.60225), 2020-10-07
Supplement: supp [file elife-60225-supp-v1.zip › elife_poa_e60225_Figure_1_figure_supplement_2_source_data_1.xlsx]

## Sheet: Figure 1-Figure supplement 2D
Figure 1-Figure supplement 2D	DLP	Population	RFP- (% per gate)				RFP+ (% per gate)				p-value (two-tailed unpaired t-test)
		Basal	37.9	38.8	33.8	50.3	58.7	58.3	62.2	45.8	0.019
		Luminal	80.7	95	70.1	83.8	16.7	4.39	24.9	15.7	< 0.0001
	VP	Population	RFP- (% per gate)				RFP+ (% per gate)
		Basal	9.6	49.1	14	21	89.4	49.3	85	77.1	0.0064
		Luminal	23.3	45.3	24.4	40.5	73.2	52.7	72.3	56.6	0.0076
