# Supplementary material for: RUNX1 marks a luminal castration-resistant lineage established at the onset of prostate development
Source: eLife journal article supplement (doi:10.7554/elife.60225), 2020-10-07
Supplement: supp [file elife-60225-supp-v1.zip › elife_poa_e60225_Figure_1_figure_supplement_3_source_data_1.xlsx]

## Sheet: Figure 1-Figure supplement 3A
Figure 1-Figure supplement 3A	Experiment	Mouse	Sample	Lobe	Population	# of cells plated	Total organoid count	OFC (%)		Lobe	Population	RFP+				RFP-				p-value (two-tailed unpaired t-test)
	1	PSN 29j#4 HET	Bas	DLP	RFP+	3000	564	18.8				Exp 1 (%)	Exp 2 (%)	Exp 3 (%)	Exp 4 (%)	Exp 1 (%)	Exp 2 (%)	Exp 3 (%)	Exp 4 (%)
			Bas	DLP	RFP-	3000	546	18.2		DLP	Bas	18.8	15.8	17.35	28.05	18.2	23.88	17.85	23.32	0.8075
			Lum	DLP	RFP+	854	55	6.44028			Lum	6.44	3.08	3.07	4.7	0.4	0.58	1.69	1.11	0.0075
			Lum	DLP	RFP-	6000	24	0.4		VP	Bas	12.87	9.9	20.65	20.65	19.87	21.6	28.17	28.17	0.0526
			Bas	VP	RFP+	3000	386	12.8667			Lum	0.62	0.95	1.06	1.06	0.66	0.32	0.46	0.46	0.118
			Bas	VP	RFP-	1872	372	19.8718
			Lum	VP	RFP+	6000	37	0.616667
			Lum	VP	RFP-	2261	15	0.663423
	2	PSN 29j#3 HET	Bas	DLP	RFP+	4000	632	15.8
			Bas	DLP	RFP-	2957	706	23.8755
			Lum	DLP	RFP+	780	24	3.07692
			Lum	DLP	RFP-	6000	35	0.583333
			Bas	VP	RFP+	4000	396	9.9
			Bas	VP	RFP-	4000	864	21.6
			Lum	VP	RFP+	6000	57	0.95
			Lum	VP	RFP-	1854	6	0.323625
	3	PSN 29e#4 HET	Bas	DLP	RFP+	4000	694	17.35
			Bas	DLP	RFP-	4000	714	17.85
			Lum	DLP	RFP+	1467	45	3.06748
			Lum	DLP	RFP-	5674	96	1.69193
			Bas	VP	RFP+	4000	826	20.65
			Bas	VP	RFP-	1008	284	28.1746
			Lum	VP	RFP+	8000	85	1.0625
			Lum	VP	RFP-	1296	6	0.462963
	4	PSN 29c#3 HET	Bas	DLP	RFP+	8000	2244	28.05
			Bas	DLP	RFP-	5934	1384	23.3232
			Lum	DLP	RFP+	1150	54	4.69565
			Lum	DLP	RFP-	8000	89	1.1125
			Bas	VP	RFP+	4378	768	17.5423
			Bas	VP	RFP-	264	58	21.9697
			Lum	VP	RFP+	3129	39	1.2464
			Lum	VP	RFP-	1486	9	0.605653

## Sheet: Figure 1-Figure supplement 3B
Figure 1-Figure supplement 3B	Lobe	Population	Hollow				Solid				p-value (two-tailed unpaired t-test)
			Exp 1 (%)	Exp 2 (%)	Exp 3 (%)	Exp 4 (%)	Exp 1 (%)	Exp 2 (%)	Exp 3 (%)	Exp 4 (%)
	Proximal AP	Bas RFP+	0.13	0	0.59	0.05	99.87	100	99.41	99.95	0.9621
		Bas RFP-	0.18	0	0.32	0.24	99.82	100	99.68	99.76
		Lum RFP+	61.22	75.86	90.82	70.54	38.78	24.14	9.18	29.46	0.0006
		Lum RFP-	15	28.57	31.48	10.53	85	71.43	68.52	89.47
	Distal AP	Bas RFP+	0	0.12	0	0.05	100	99.88	100	99.95	0.8245
		Bas RFP-	0	0.13	0	0	100	99.87	100	100
		Lum RFP+	0	0	52.94	12.5	100	100	47.06	87.5	0.5032
		Lum RFP-	6.98	7.94	9.66	5.03	93.02	92.06	90.34	94.97
	DLP	Bas RFP+	0	0	1.87	0.09	100	100	98.13	99.91	0.9617
		Bas RFP-	0	0	2.1	0	100	100	97.9	100
		Lum RFP+	65.45	54.17	44.44	44.44	34.55	45.83	55.56	55.56	0.0122
		Lum RFP-	12.5	5.71	37.5	28.09	87.5	94.29	62.5	71.91
	VP	Bas RFP+	0	0.25	0	0	100	99.75	100	100	0.6558
		Bas RFP-	0	0.12	0	0	100	99.88	100	100
		Lum RFP+	75.68	73.68	32.94	38.46	24.32	26.32	67.06	61.54	0.0871
		Lum RFP-	46.67	16.67	33.33	0	53.33	83.33	66.67	100

## Sheet: Figure 1-Figure supplement 3C
Figure 1-Figure supplement 3C	Lobe	Organoid Type	Population	Exp 1 (%)	Exp 2 (%)	p-value (two-tailed unpaired t-test)
	DLP	K5+	Bas RFP+	80	98.2659	0.9709
			Bas RFP-	81.6176	95.6989
			Lum RFP+	28	35.8491	0.4315
			Lum RFP-	72.973	31.8182
		K5+K8+	Bas RFP+	20	1.7341	0.9709
			Bas RFP-	18.3824	4.30108
			Lum RFP+	8	24.5283	0.5221
			Lum RFP-	13.5135	4.54545
		K8+	Bas RFP+	0	0	NA
			Bas RFP-	0	0
			Lum RFP+	64	39.6226	0.6816
			Lum RFP-	13.5135	63.6364
	VP	K5+	Bas RFP+	96.4286	98.1308	0.5459
			Bas RFP-	87.234	98.8571
			Lum RFP+	4.7619	4.7619	0.5095
			Lum RFP-	46.6667	0
		K5+K8+	Bas RFP+	3.57143	1.86916	0.5459
			Bas RFP-	12.766	1.14286
			Lum RFP+	0	0	0.0267
			Lum RFP-	6.66667	4.7619
		K8+	Bas RFP+	0	0	NA
			Bas RFP-	0	0
			Lum RFP+	95.2381	95.2381	0.4226
			Lum RFP-	46.6667	95.2381

## Sheet: Figure 1-Figure supplement 3D
Figure 1-Figure supplement 3D	population	organoid type	% hollow organoids		% solid organoids				Two-way ANOVA
			Exp 1	Exp 2	Exp 1	Exp 2
	AP_Prox_L+	K5+	0	0	100	100		AP_Prox_L+	Tukey's multiple comparisons test	Mean Diff.	95.00% CI of diff.	Significant?	Summary	Adjusted P Value
	AP_Prox_L+	K5+K8+	40	100	60	0
	AP_Prox_L+	K8+	90.9091	93.3333	9.09091	6.66667			Hollow
	AP_Prox_L-	K5+	0	0	100	100			K5+ vs. K5+K8+	-70	-145.2 to 5.218	No	ns	0.0651
	AP_Prox_L-	K5+K8+	33.3333	50	66.6667	50			K5+ vs. K8+	-92.12	-167.3 to -16.90	Yes	*	0.022
	AP_Prox_L-	K8+	71.4286	60	28.5714	40			K5+K8+ vs. K8+	-22.12	-97.34 to 53.10	No	ns	0.6587
	AP_Dist_L+	K5+	0	0	100	100
	AP_Dist_L+	K5+K8+	0	NA	100	NA		AP_Prox_L-	Tukey's multiple comparisons test	Mean Diff.	95.00% CI of diff.	Significant?	Summary	Adjusted P Value
	AP_Dist_L+	K8+	NA	NA	NA	NA
	AP_Dist_L-	K5+	0	0	100	100			Hollow
	AP_Dist_L-	K5+K8+	50	100	50	0			K5+ vs. K5+K8+	-41.67	-66.98 to -16.35	Yes	**	0.0056
	AP_Dist_L-	K8+	42.8571	100	57.1429	0			K5+ vs. K8+	-65.72	-91.03 to -40.40	Yes	***	0.0005
									K5+K8+ vs. K8+	-24.05	-49.37 to 1.268	No	ns	0.0605
								AP_Dist_L+	NA
								AP_Dist_L-	Tukey's multiple comparisons test	Mean Diff.	95.00% CI of diff.	Significant?	Summary	Adjusted P Value
									Hollow
									K5+ vs. K5+K8+	-75	-170.1 to 20.11	No	ns	0.1131
									K5+ vs. K8+	-71.43	-166.5 to 23.68	No	ns	0.131
									K5+K8+ vs. K8+	3.57	-91.54 to 98.68	No	ns	0.9927

## Sheet: Figure 1-Figure supplement 3E
Figure 1-Figure supplement 3E		Proximal AP - Basal (µm2)		Proximal AP - Luminal (µm2)
		Bas RFP+	Bas RFP-	Lum RFP+	Lum RFP-		Comparison	p-value (two tailed Mann Whitney test)
	Organoid 1	1271.91	5911.03	2277.21	7600.88		Bas RFP- vs Bas RFP+	0.8817
	Organoid 2	1914.8	7806.39	890.056	16613.9		Lum RFP- vs Lum RFP+	0.0051
	Organoid 3	5738.85	5838.82	4348.92	2452.17
	Organoid 4	3388.04	2092.53	27232.1	11451.3
	Organoid 5	13339.7	11495.7	1902.3	12763.5
	Organoid 6	13280	1981.45	1913.41	10980.6
	Organoid 7	7289.85	21994.5	1855.09	13774.3
	Organoid 8	1863.42	11013.9	7924.41	12698.2
	Organoid 9	2674.33	5986.01	2495.21	16779.2
	Organoid 10	2775.7	5948.52	731.762	6149.86
	Organoid 11	3883.75	3058.96	946.986	719.265
	Organoid 12	7916.08	12962	2075.87	934.489
	Organoid 13	2448	13445.3	2374.41	723.431
	Organoid 14	1046.96	7032.97	777.584	710.934
	Organoid 15	1377.43	1748.18	1555.17	3880.98
	Organoid 16	4651.62	5527.79	1520.45	16636.1
	Organoid 17	2189.73	3014.53	3379.71	3993.45
	Organoid 18	14561.6	1087.23	20668.5	38958.3
	Organoid 19	9775.34	6713.6	10897.3	710.934
	Organoid 20	937.266	2735.43	29893.9	25520
	Organoid 21	1909.25	7610.6	1621.82	21168.3
	Organoid 22	1939.79	10090.5	14088.2	1498.24
	Organoid 23	20707.3	2977.04	908.107	1485.74
	Organoid 24	2328.59	6566.42	15330.9	22379.1
	Organoid 25	16991.6	2300.82	3207.53	12841.2
	Organoid 26	13717.4	12588.5	1040.02	4534.58
	Organoid 27	2624.35	4500.27	726.208	958.89
	Organoid 28	2859.01	20807.3	1506.57	10428.3
	Organoid 29	3074.23	4307.26	1952.29	7016.57
	Organoid 30	3489.41	13981.2	1266.35	29151.7
	Organoid 31	8507.6	5313.95	15696.1	1377.19
	Organoid 32	1430.2	6701.11	8246.46	2705.74
	Organoid 33	4137.86	21866.8	1634.28	23046.7
	Organoid 34	5126.5	2809.02	2406.95	8249.23
	Organoid 35	13934	9812.83	7119.41	6844.25
	Organoid 36	8303.49	9279.63	1767.69	23169
	Organoid 37	2707.66	3083.95	6268.92	7026.3
	Organoid 38	2821.52	3842.1	2283.27	865.781
	Organoid 39	3481.08	7395.38	1798.27	15425.6
	Organoid 40	2134.19	3110.34	3764.69	8417.39
	Organoid 41	5845.77	13638.3	1696.82	31479.4
	Organoid 42	2171.68	27875	722.642	11528.9
	Organoid 43	3147.83	2699.33	3149.05	12034.8
	Organoid 44	2581.3	9914.2	3534	840.766
	Organoid 45	2159.18	5965.18	3520.1	11994.5
	Organoid 46	21689	2386.91	1292.42	4844.48
	Organoid 47	5358.39	11588.8	1256.29	1516.16
	Organoid 48	2091.15	1652.37	936.655	5799.2
	Organoid 49	9096.34	3181.15	2536.19	6228.62
	Organoid 50	24264.8	1594.05	19829.6	783.788
	Organoid 51	14310.3	7230.14	2241.58	24036.2
	Organoid 52	8618.69	7924.41	17062.7	20133.9
	Organoid 53	12076.2	2192.51	18310.6
	Organoid 54	4247.55	6908	2393.06
	Organoid 55	2184.18	13800.7	2746.04
	Organoid 56	3481.08	5008.47	2919.75
	Organoid 57	4930.72	6335.92
	Organoid 58	4662.73	6809.41
	Organoid 59	17777.5	11250
	Organoid 60	2324.42	6670.56
	Organoid 61	4815.47	1634.31
	Organoid 62	815.075	2649.34
	Organoid 63	9985.01	17519.2
	Organoid 64	11686	13727.1
	Organoid 65	2663.23	1013.64
	Organoid 66	2629.9	12566.3
	Organoid 67	4666.89	2739.6
	Organoid 68	27080.8	4451.67
	Organoid 69	31289.4	8553.42
	Organoid 70	2995.09	16841.6
	Organoid 71	1980.06	2442.45
	Organoid 72	6599.74	4780.75
	Organoid 73	2900.67	6928.83
	Organoid 74	9271.3	11783.2
	Organoid 75	15583.6	10018.3
	Organoid 76	3415.82	11319.4
	Organoid 77	903.941	5072.35
	Organoid 78	6388.69	4414.18
	Organoid 79	9212.98	5917.97
	Organoid 80	27150.2	10250.2
	Organoid 81	8171.57	1691.25
	Organoid 82	1076.12	7786.95
	Organoid 83	18578.7	2925.66
	Organoid 84	4514.15	3974.01
	Organoid 85	17011	11744.3
	Organoid 86	1523.23	905.33
	Organoid 87	12099.8	8876.95
	Organoid 88	7357.89	6952.43
	Organoid 89	2307.76	13657.7
	Organoid 90	4740.49	3714.35
	Organoid 91	5627.76	11283.3
	Organoid 92	20846.2	1076.12
	Organoid 93	3756.01	22615.2
	Organoid 94	2782.64	13609.1
	Organoid 95	9921.14	3125.61
	Organoid 96	7557.84	24871.6
	Organoid 97	960.872	1752.34
	Organoid 98	5227.86	4368.36
	Organoid 99	4430.84	1459.36
	Organoid 100	845.623	3507.46
	Organoid 101	18491.2	10782
	Organoid 102	7473.14	3689.36
	Organoid 103	2645.17	4584.97
	Organoid 104	11015.3	9085.24
	Organoid 105	16243.2	5543.06
	Organoid 106	1680.14	4087.87
	Organoid 107	13920.1	5150.11
	Organoid 108	22352.8	1527.4
	Organoid 109	3961.51	15211.5
	Organoid 110	3424.15	6394.24
	Organoid 111	8325.7	19628.4
	Organoid 112	2936.77	5366.72
	Organoid 113	10026.7	909.496
	Organoid 114	3188.09	3083.95
	Organoid 115	5445.87	1426.03
	Organoid 116	4357.25	13727.1
	Organoid 117	18389.9	19749.2
	Organoid 118	1935.63	2897.89
	Organoid 119	9653.15	1766.23
	Organoid 120	2581.3	3943.46
	Organoid 121	2566.03	1721.79
	Organoid 122	6416.46	16769.4
	Organoid 123	10490.4	1076.12
	Organoid 124	1614.88	37354.6
	Organoid 125	12517.7	6599.74
	Organoid 126	17595.6	14206.2
	Organoid 127	3987.9	10054.4
	Organoid 128	2243.89	23587.2
	Organoid 129	22340.3	11945.6
	Organoid 130	4383.63	16498.7
	Organoid 131	3693.52	10072.5
	Organoid 132	6316.48	1364.94
	Organoid 133	21328	812.298
	Organoid 134	8570.09	5076.51
	Organoid 135	14149.3	5359.78
	Organoid 136	14942.1	9735.07
	Organoid 137	3593.55	11154.2
	Organoid 138	23653.8	4446.11
	Organoid 139	5501.41	949.763
	Organoid 140	11037.5	813.686
	Organoid 141	7393.99	5909.64
	Organoid 142	3104.78	4930.72
	Organoid 143	5359.78	3372.77
	Organoid 144	3508.85	12326.1
	Organoid 145	6138.75	4922.38
	Organoid 146	7989.68	7178.77
	Organoid 147	1678.75	15675.3
	Organoid 148	4067.04	6988.54
	Organoid 149	1348.28	9524.02
	Organoid 150	30445.2	2775.7
	Organoid 151	15744.7	10325.2
	Organoid 152	3957.35	9447.65
	Organoid 153	5002.92	5050.13
	Organoid 154	27251.5	9574
	Organoid 155	3933.74	4966.82
	Organoid 156	2643.79	26765.6
	Organoid 157	3096.45	2778.47
	Organoid 158	21772.4	10103
	Organoid 159	6610.85	10716.8
	Organoid 160	14342.3	3647.7
	Organoid 161	28451.2	6055.44
	Organoid 162	2718.77	4729.38
	Organoid 163	7621.71	15957.1
	Organoid 164	3356.11	6755.26
	Organoid 165	20797.6	10278
	Organoid 166	2774.31	5754.12
	Organoid 167	3444.97	1238.58
	Organoid 168	4736.32	4255.88
	Organoid 169	7309.29	3629.65
	Organoid 170	5250.08	2492.43
	Organoid 171	898.387	2005.06
	Organoid 172	11966.5	20722.6
	Organoid 173	5008.47	13710.5
	Organoid 174	3226.97	7231.53
	Organoid 175	1502.4	6401.18
	Organoid 176	1545.45	2659.06
	Organoid 177	2396.62	13443.9
	Organoid 178	2386.91	11942.9
	Organoid 179	3803.22	11244.4
	Organoid 180	3079.79	2518.82
	Organoid 181	27782	2291.1
	Organoid 182	9324.07	4044.83
	Organoid 183	2928.44	10058.6
	Organoid 184	10205.8	7960.52
	Organoid 185	4272.55	4954.32
	Organoid 186	29471.8	6463.67
	Organoid 187	15901.6	9751.74
	Organoid 188	5734.68	5863.82
	Organoid 189	2689.61	4133.69
	Organoid 190	4266.99	9953.08
	Organoid 191	28531.8	23462.2
	Organoid 192	6056.82	1727.35
	Organoid 193	5451.42	6233.17
	Organoid 194	4508.6	6787.2
	Organoid 195	3517.18	13770.2
	Organoid 196	8853.35	2536.87
	Organoid 197	9887.69	2504.93
	Organoid 198	7850.39	4378.08
	Organoid 199	20038	1562.11
	Organoid 200	1108.98	816.463
	Organoid 201	12661.5	5741.62
	Organoid 202	14851.7	11007
	Organoid 203	9730.65	3010.36
	Organoid 204	8870.43	8007.73
	Organoid 205	5412.87	8402.07
	Organoid 206	4030.12	6173.46
	Organoid 207	9758.44	3844.88
	Organoid 208	15642.4	7345.39
	Organoid 209	17857.6	2323.03
	Organoid 210	10482.5	2627.12
	Organoid 211	10249	1827.32
	Organoid 212	2019.23	20632.4
	Organoid 213	6956.82	11488.8
	Organoid 214	883.847	8820.02
	Organoid 215	9809.86	8656.18
	Organoid 216	11973.6	7288.46
	Organoid 217	11106.4	8563.14
	Organoid 218	5661.62	1925.91
	Organoid 219	28609.7	1091.39
	Organoid 220	14904.5	8259.05
	Organoid 221	11294.1	13852.1
	Organoid 222	2028.96	23240
	Organoid 223	32969.1	23763.5
	Organoid 224	1763.52	4032.33
	Organoid 225	29471.3	1407.98
	Organoid 226	12439.2	3014.53
	Organoid 227	12305.8	8231.17
	Organoid 228	26284.7	33304.1
	Organoid 229	13709.3	27821.7
	Organoid 230	10078.1	11538.6
	Organoid 231	9790.41	29253.1
	Organoid 232	22101.7	7215.3
	Organoid 233	714.304	2868.33
	Organoid 234	1015.87	13748.3
	Organoid 235	45929.4	7204.18
	Organoid 236	13823.3	13838.6
	Organoid 237	2883.62	6684.44
	Organoid 238	4738.86	16574.9
	Organoid 239	7067.99	16487.4
	Organoid 240	24617.1	1147.89
	Organoid 241	21091.4	7231.98
	Organoid 242	4373.37	4648.53
	Organoid 243	13912.2	3689.64
	Organoid 244	8939.91	9651.44
	Organoid 245	8008.82	18558
	Organoid 246	5669.96	10953.6
	Organoid 247	703.186	11599.8
	Organoid 248	8966.32	12251.6
	Organoid 249	17890.9	9679.23
	Organoid 250	4155.19	5071
	Organoid 251	6145.24	2587.61
	Organoid 252	13072.9	4498.45
	Organoid 253	2023.4	4897.29
	Organoid 254	12493.4	17250.3
	Organoid 255	2598.73	16398.4
	Organoid 256	35915.3	19365.4
	Organoid 257	3810.55	16542.9
	Organoid 258	882.457	10508.9
	Organoid 259	33294.3	10003
	Organoid 260	1778.81	20178.4
	Organoid 261	16551.3	15318.6
	Organoid 262	7679.46	8210.32
	Organoid 263	37637.1	7530.76
	Organoid 264	19012.4	23355.2
	Organoid 265	3281.07	9873.79
	Organoid 266	9383.23	47426.2
	Organoid 267	25217.4	4517.9
	Organoid 268	31013.8	1745.46
	Organoid 269	14684.9	16770.9
	Organoid 270	13688.5	7044.37
	Organoid 271	10885.5	2445.86
	Organoid 272	804.634	6581.6
	Organoid 273	11232.9	14097.1
	Organoid 274	2755.77	2145.69
	Organoid 275	8111.65	27913.4
	Organoid 276	22460.3	17646.4
	Organoid 277	4630.47	8374.31
	Organoid 278	16815.3	18594.1
	Organoid 279	1018.65	6420.4
	Organoid 280	4751.37	16834.8
	Organoid 281	16106.6	11306.6
	Organoid 282	3094.85	4535.97
	Organoid 283	6599.67	5578.24
	Organoid 284	1871.92	35202.4
	Organoid 285	13064.5	8402.1
	Organoid 286	9511.08	5674.13
	Organoid 287	9386.01	9202.57
	Organoid 288	6100.76	4683.28
	Organoid 289	15942.6	10643.7
	Organoid 290	8418.78	16027.4
	Organoid 291	9436.04	22982.8
	Organoid 292	10799.3	8593.88
	Organoid 293	14559.8	7337.59
	Organoid 294	11359.4	31743.4
	Organoid 295	43836.6	16258.1
	Organoid 296	3439.5	13374.4
	Organoid 297	22496.4	23238.5
	Organoid 298	16441.5	8550.8
	Organoid 299	17888.2	7971.3
	Organoid 300	6627.46	3610.43
	Organoid 301	28647.2	10904.9
	Organoid 302	18256.4	5890.92
	Organoid 303	16780.6	14886.4
	Organoid 304	36133.5	6313.39
	Organoid 305	16020.4	8914.9
	Organoid 306	2267.98	8964.93
	Organoid 307	2780.78	16697.2
	Organoid 308	10902.2	11285.7
	Organoid 309	10796.5	6802.56
	Organoid 310	15748	17433.7
	Organoid 311	16263.6	2348.59
	Organoid 312	16134.4	4504
	Organoid 313	22791	721.252
	Organoid 314	10789.6	5414.26
	Organoid 315	12437.8	4128.79
	Organoid 316	10709	13924.8
	Organoid 317	13008.9	13549.5
	Organoid 318	2926.7	1314.65
	Organoid 319	12982.5	17333.7
	Organoid 320	7896.25	9326.25
	Organoid 321	25302.2	1086.74
	Organoid 322	12365.5	9131.69
	Organoid 323	5137.71	3646.56
	Organoid 324	9866.84	12123.7
	Organoid 325	1077.01	10133.7
	Organoid 326	3447.84	1898.32
	Organoid 327	5094.63	17175.3
	Organoid 328	10797.9	11497
	Organoid 329	2893.35	8475.76
	Organoid 330	2001.16	18352.3
	Organoid 331	7664.17	5007.07
	Organoid 332	27014.3	8896.83
	Organoid 333	46525.6	25742.7
	Organoid 334	3403.37	11027.2
	Organoid 335	10792.4	4091.26
	Organoid 336	17802	23491.4
	Organoid 337	1192.36	7559.95
	Organoid 338	17611.6	4028.73
	Organoid 339	3621.55	13364.7
	Organoid 340	10426.9	6459.31
	Organoid 341	22803.5	11991.7
	Organoid 342	3379.74	18777.6
	Organoid 343	700.407	13874.7
	Organoid 344	17885.4	13810.8
	Organoid 345	5207.19	15742.5
	Organoid 346	19461.3	10274
	Organoid 347	28886.2	1795.49
	Organoid 348	2190.16	10242.1
	Organoid 349	12743.5	3069.84
	Organoid 350	9146.98	10260.1
	Organoid 351	19182	12304.4
	Organoid 352	14976.8	3465.9
	Organoid 353	8996.89	4512.34
	Organoid 354	25906.7	7651.67
	Organoid 355	38779.5	2529.25
	Organoid 356	2737.7	20978.8
	Organoid 357	5765.85	2322.18
	Organoid 358	12965.9	1700.99
	Organoid 359	21757.1	21256.8
	Organoid 360	34625.7	3736.89
	Organoid 361	3960.63	1858.02
	Organoid 362	6225.84	7469.62
	Organoid 363	2244.36	8142.23
	Organoid 364	9141.42	11078.7
	Organoid 365	12649	18488.5
	Organoid 366	13299.4	9465.22
	Organoid 367	1083.96	6154.96
	Organoid 368	2351.37	8183.92
	Organoid 369	2333.3	13505.1
	Organoid 370	4266.37	15452
	Organoid 371		7414.03
	Organoid 372		8560.53
	Organoid 373		7710.03
	Organoid 374		3004.52
	Organoid 375		18198.1
	Organoid 376		4991.79
	Organoid 377		13778.8
	Organoid 378		13211.8
	Organoid 379		7218.08
	Organoid 380		14958.7
