# Supplementary material for: RUNX1 marks a luminal castration-resistant lineage established at the onset of prostate development
Source: eLife journal article supplement (doi:10.7554/elife.60225), 2020-10-07
Supplement: supp [file elife-60225-supp-v1.zip › elife_poa_e60225_Figure_1_source_data_1.xlsx]

## Sheet: Figure 1B
Figure 1B		Double Positive (% per gate)								NKX3.1-high (% per gate)								RUNX1-high (% per gate)								Double Negative (% per gate)
	Proximal AP	0.647149	0.186352	0.37686	0.124809	0.124224	0.262677			47.4884	52.5424	44.9124	22.854	22.619	26.7702	10.1877		7.08783	8.69642	9.27603	35.4874	16.6667	20.1233	6.39106		44.7766	38.5749	45.4347	41.5338	60.5901	52.8438	83.4212
	Distal AP	0.836454	0.118559	0.491428	0.771391	0.272232	0.343999	0.0384181	0.0991923	65.9181	48.6143	68.3679	64.4835	57.989	41.4317	27.8387	21.4624	1.38583	0.516228	0.877077	1.31521	1.3472	1.12809	0.521046	0.844552	31.8596	50.7509	30.2636	33.4299	40.3916	57.0962	71.6018	77.5939

## Sheet: Figure 1D
Figure 1F	Population	Proximal AP (% per gate)							Distal AP (% per gate)							p-value (two-tailed unpaired t-test)
	Basal RFP-	55.7	59.7	64.8	62.8	54.7	54	46	73.5	74.6	77.9	80.9	84.7	84.8	83.5	< 0.0001
	Basal RFP+	41.5	37	33	34	41.8	42.4	50	22.4	21.5	18.8	16.2	13.1	12.5	13	< 0.0001
	Luminal RFP-	87	90.9	80.8	82	73.8	87.5	72.4	89.6	95.9	90.6	89.7	95.9	96	94.3	0.0024
	Luminal RFP+	12.4	8.32	17.8	17.3	25.7	12.2	27.1	7.64	2.63	8.58	9.68	3.14	3.27	3.9	0.0016

## Sheet: Figure 1F
Figure 1F	Experiment	Mouse	Sample	Lobe	Population	# of cells plated	Total organoid count	OFC (%)		Lobe	Population	RFP+				RFP-				p-value (two-tailed unpaired t-test)
	1	PSN 29j#4 HET	Bas	AP prox	RFP+	3000	782	26.0667				Exp 1 (%)	Exp 2 (%)	Exp 3 (%)	Exp 4 (%)	Exp 1 (%)	Exp 2 (%)	Exp 3 (%)	Exp 4 (%)
			Bas	AP prox	RFP-	3000	560	18.6667		Proximal AP	Bas	26.07	27.81	21.25	41.57	18.67	25.94	15.45	27.94	0.2219
			Lum	AP prox	RFP+	1115	49	4.39462			Lum	4.39	7.61	14.53	8.46	0.67	0.91	1.61	0.98	0.0111
			Lum	AP prox	RFP-	6000	40	0.666667		Distal AP	Bas	23.45	23.78	45.95	25.9	13.47	19.35	25.63	19.35	0.1342
			Bas	AP dist	RFP+	2601	610	23.4525			Lum	6.9	4.17	2.06	1.83	0.72	1.05	2.2	1.99	0.1173
			Bas	AP dist	RFP-	3000	404	13.4667
			Lum	AP dist	RFP+	29	2	6.89655
			Lum	AP dist	RFP-	6000	43	0.716667
	2	PSN 29j#3 HET	Bas	AP prox	RFP+	3509	976	27.8142
			Bas	AP prox	RFP-	2891	750	25.9426
			Lum	AP prox	RFP+	381	29	7.61155
			Lum	AP prox	RFP-	2314	21	0.907519
			Bas	AP dist	RFP+	3621	861	23.778
			Bas	AP dist	RFP-	4000	774	19.35
			Lum	AP dist	RFP+	72	3	4.16667
			Lum	AP dist	RFP-	6000	63	1.05
	3	PSN 29e#4 HET	Bas	AP prox	RFP+	4000	850	21.25
			Bas	AP prox	RFP-	4000	618	15.45
			Lum	AP prox	RFP+	2024	294	14.5257
			Lum	AP prox	RFP-	6727	108	1.60547
			Bas	AP dist	RFP+	4000	1838	45.95
			Bas	AP dist	RFP-	4000	1025	25.625
			Lum	AP dist	RFP+	825	17	2.06061
			Lum	AP dist	RFP-	8000	176	2.2
	4	PSN 29c#3 HET	Bas	AP prox	RFP+	4801	1996	41.5747
			Bas	AP prox	RFP-	2949	824	27.9417
			Lum	AP prox	RFP+	1324	112	8.45921
			Lum	AP prox	RFP-	7754	76	0.980139
			Bas	AP dist	RFP+	8000	2072	25.9
			Bas	AP dist	RFP-	8000	1548	19.35
			Lum	AP dist	RFP+	872	16	1.83486
			Lum	AP dist	RFP-	8000	159	1.9875

## Sheet: Figure 1H
Figure 1H	Lobe	Organoid Type	Population	Exp 1 (%)	Exp 2 (%)	p-value (two-tailed unpaired t-test)	Comment
	Proximal AP	K5+	Bas RFP+	74.4898	97.1264	0.8424
			Bas RFP-	80.0885	98.0519
			Lum RFP+	12.9032	36	0.0878
			Lum RFP-	60	74.0741
		K5+K8+	Bas RFP+	25.5102	2.87356	0.8304
			Bas RFP-	19.469	1.94805
			Lum RFP+	16.129	4	0.9607
			Lum RFP-	12	7.40741
		K8+	Bas RFP+	0	0	0.4226
			Bas RFP-	0.442478	0
			Lum RFP+	70.9677	60	0.0282
			Lum RFP-	28	18.5185
	Distal AP	K5+	Bas RFP+	98.8166	97.449	0.6334
			Bas RFP-	98.6301	95.9677
			Lum RFP+	75	100	0.7448
			Lum RFP-	71.875	91.3043
		K5+K8+	Bas RFP+	1.18343	2.55102	0.9568
			Bas RFP-	0.684932	3.22581
			Lum RFP+	25	0	0.6237
			Lum RFP-	6.25	4.34783
		K8+	Bas RFP+	0	0	0.0066
			Bas RFP-	0.684932	0.806452		p < 0.05 but very low proportion of organoids of this type (<1%), therefore excluded from the main figure
			Lum RFP+	0	0	0.2733
			Lum RFP-	21.875	4.34783
