# Supplementary material for: RUNX1 marks a luminal castration-resistant lineage established at the onset of prostate development
Source: eLife journal article supplement (doi:10.7554/elife.60225), 2020-10-07
Supplement: supp [file elife-60225-supp-v1.zip › elife_poa_e60225_Figure_2_figure_supplement_1_source_data_1.xlsx]

## Sheet: Figure 2 - Figure supplement 1A
Figure 2 - Figure supplement 1A	Lobe	Population	RFP-			RFP+
	AP	Basal	0.056	0.32	2.7	99.9	99.7	96.8
		Luminal	15.4	16.3	10.4	80.7	79.2	86.9
	DLP	Basal	0.15	0.46	3.41	99.8	99.5	96.4
		Luminal	16.9	16.8	15.9	81.7	82.1	81.2
	VP	Basal	0.11	0.12	4.37	99.9	99.8	95.4
		Luminal	16.4	16	21.5	82.9	83.1	77.9
