# Supplementary material for: RUNX1 marks a luminal castration-resistant lineage established at the onset of prostate development
Source: eLife journal article supplement (doi:10.7554/elife.60225), 2020-10-07
Supplement: supp [file elife-60225-supp-v1.zip › elife_poa_e60225_Figure_2_source_data_1.xlsx]

## Sheet: Figure 2B-C
Figure 2B/C	Hormone status	RFP- (% per gate)			RFP+ (% per gate)			p-value (two-tailed unpaired t-test) - RFP+ intact vs Regressed
	Intact	81.3	76.1	68.5	17	22.4	29	p=0.0004
	Regressed	27.4	11.7	3.8	79.1	86.7	95.4
