# Supplementary material for: RUNX1 marks a luminal castration-resistant lineage established at the onset of prostate development
Source: eLife journal article supplement (doi:10.7554/elife.60225), 2020-10-07
Supplement: supp [file elife-60225-supp-v1.zip › elife_poa_e60225_Figure_4_figure_supplement_1_source_data_1.xlsx]

## Sheet: Figure 4-Figure supplement 1A
Figure 4-Figure supplement 1A	Mouse ID	# RFP+ cells	# RUNX1+ cells	Percentage
	1d	153	2293	6.67248
	1e	15	546	2.74725

## Sheet: Figure 4-Figure supplement 1B
Figure 4-Figure supplement 1B	Intact (%)	Castrated (%)	Regenerated (%)
	0.033	0.26	0.054
	0.027	0.15	0.031

## Sheet: Figure 4-Figure supplement 1C
Figure 4-Figure supplement 1C	# Intact	# Regressed	# Regenerated		Comparison	p-value (two-tailed unpaired t-test)
	1196	1038	1344		Intact vs Castrated	0.828
	1016	482	1532		Castrated vs Regenerated	0.1669
	1456	784	789		Intact vs Regenerated	0.2921
	289	1444	1411
	883	809

## Sheet: Figure 4-Figure supplement 1D
Figure 4-Figure supplement 1D										K4+					K4-
	Treatment	Mouse ID	RFP+ K4+	RFP+ K4-	% K4+	% K4-		Summary data	Intact	64.7	72.2	70.6			35.3	27.8	29.4
	Castrated	YKA_15.3B	27	16	62.7907	37.2093			Castrated	62.8	74.4	79.5	81.3	77.8	37.2	25.6	20.5	18.8	22.2
	Castrated	YKA_15.3E	58	20	74.359	25.641			Regenerated	58.7	77.3	81.8	83.9		41.3	22.7	18.2	16.1
	Castrated	YKA_21.3B	58	15	79.4521	20.5479
	Castrated	YKA_15.1C	13	3	81.25	18.75			Comparison	p-value (two-tailed unpaired t-test)
	Castrated	YKA_19.1D	7	2	77.7778	22.2222			Intact vs Castrated	0.249
	Intact	YKA_19.1B	11	6	64.7059	35.2941			Castrated vs Regenerated	0.9675
	Intact	YKA_19.2A	83	32	72.1739	27.8261			Intact vs Regenerated	0.4158
	Intact	YKA_16.1D	12	5	70.5882	29.4118
	Regenerated	YKA_19.3B	54	38	58.6957	41.3043
	Regenerated	YKA_19.3C	17	5	77.2727	22.7273
	Regenerated	YKA_21.2A	9	2	81.8182	18.1818
	Regenerated	YKA_21.2C	73	14	83.908	16.092
