# Supplementary material for: RUNX1 marks a luminal castration-resistant lineage established at the onset of prostate development
Source: eLife journal article supplement (doi:10.7554/elife.60225), 2020-10-07
Supplement: supp [file elife-60225-supp-v1.zip › elife_poa_e60225_Figure_4_source_data_1.xlsx]

## Sheet: Figure 4D
Figure 4D	Treatment	Mouse ID	Location	# RFP cells	Total # RFP cells / sample	Percentage
	Intact	16.1D	Dist	59	197	29.9492
	Intact	16.1D	Prox	138	197	70.0508		Summary data	Proximal					Distal
	Intact	19.1A	Dist	27	101	26.7327		Intact	70.0508	73.2673	91.6667	67.4419	94.0887	29.9492	26.7327	8.33333	32.5581	5.91133
	Intact	19.1A	Prox	74	101	73.2673		Castrated	91.358	82.2917	69.3252			8.64198	17.7083	30.6748
	Intact	19.1B	Dist	13	156	8.33333		Regenerated	73.0337	59.8214	92.7273	75.625		26.9663	40.1786	7.27273	24.375
	Intact	19.1B	Prox	143	156	91.6667
	Castrated	19.1D	Dist	7	81	8.64198
	Castrated	19.1D	Prox	74	81	91.358		Comparison	p-value (two-tailed unpaired t-test)
	Intact	19.1E	Dist	14	43	32.5581		Intact vs Castrated	0.8548
	Intact	19.1E	Prox	29	43	67.4419		Castrated vs Regenerated	0.5801
	Castrated	15.3B	Dist	17	96	17.7083		Intact vs Regenerated	0.6602
	Castrated	15.3B	Prox	79	96	82.2917
	Castrated	15.3E	Dist	50	163	30.6748
	Castrated	15.3E	Prox	113	163	69.3252
	Intact	19.2A	Dist	12	203	5.91133
	Intact	19.2A	Prox	191	203	94.0887
	Regenerated	19.3B	Dist	48	178	26.9663
	Regenerated	19.3B	Prox	130	178	73.0337
	Regenerated	19.3C	Dist	45	112	40.1786
	Regenerated	19.3C	Prox	67	112	59.8214
	Regenerated	21.2A	Dist	4	55	7.27273
	Regenerated	21.2A	Prox	51	55	92.7273
	Regenerated	21.2C	Dist	39	160	24.375
	Regenerated	21.2C	Prox	121	160	75.625

## Sheet: Figure 4E
Figure 4E	Mouse ID	Treatment	# Epith. Cells	# Epith. RFP+ cells	Percentage
	15.1C	Castrated	77783	209	0.268696
	15.3B	Castrated	160381	200	0.124703		Summary data	Intact (%)	Castrated (%)	Regenerated (%)
	15.3E	Castrated	156290	317	0.202828			0.066994	0.268696	0.0752561
	16.1D	Intact	598561	401	0.066994			0.0568929	0.124703	0.0857869
	19.1A	Intact	441180	251	0.0568929			0.0815295	0.202828	0.0442199
	19.1B	Intact	561760	458	0.0815295			0.0161734	0.373622	0.0790277
	19.1D	Castrated	64236	240	0.373622			0.0494834	0.209301
	19.1E	Intact	426625	69	0.0161735
	19.2A	Intact	305153	151	0.0494834
	19.3B	Regenerated	350802	264	0.0752561		Comparison	p-value (two-tailed unpaired t-test)
	19.3C	Regenerated	301911	259	0.0857869		Intact vs Castrated	0.0028
	21.2A	Regenerated	201267	89	0.0442199		Castrated vs Regenerated	0.0105
	21.2C	Regenerated	287241	227	0.0790277		Intact vs Regenerated	0.292
	21.3B	Castrated	96034	201	0.209301

## Sheet: Figure 4G
Figure 4G	Mouse ID	Treatment	1 cell	2-4 cells	> 4 cells	% 2-4 cells
	19.2A	Intact	134	6	0	4.28571
	19.1E	Intact	78	6	0	7.14286		Summary data	Intact (%)	Castrated (%)	Regenerated (%)
	16.1D	Intact	281	27	0	8.76623			4.3	4.7	16.1
	19.1A	Intact	289	18	0	5.86319			7.1	4.4	11.5
	19.1B	Intact	442	41	0	8.47107			8.8	3.4	13.2
	19.1D	Castrated	225	11	0	4.66102			5.9	6.1	18.1
	15.1C	Castrated	173	8	0	4.41989			8.5	4.9
	15.3E	Castrated	253	9	0	3.43511
	21.3B	Castrated	108	7	0	6.08696
	15.3B	Castrated	176	9	0	4.86486		Comparison	p-value (two-tailed unpaired t-test)
	21.2C	Regenerated	167	32	0	16.0804		Intact vs Castrated	0.0462
	21.2A	Regenerated	131	17	0	11.4865		Castrated vs Regenerated	0.0002
	19.3C	Regenerated	171	26	0	13.198		Intact vs Regenerated	0.0018
	19.3B	Regenerated	185	41	0	18.0617

## Sheet: Figure 4H
Figure 4H	Treatment	Mouse ID	K5/K8	# RFP+ cells	# RFP+ cell / sample	Percentage
	Castrated	15.1C	K5	16	99	16.1616
	Castrated	15.1C	K8	83	99	83.8384		Summary data		K5+					K8+
	Intact	16.1D	K5	62	317	19.5584			Intact	19.5584	13.6564	10.8225	13.1868	11.3269	80.4416	86.3436	89.1775	86.8132	88.6731
	Intact	16.1D	K8	255	317	80.4416			Castrated	16.1616	22	33.8129	26.3941		83.8384	78	66.1871	73.6059
	Intact	19.1A	K5	31	227	13.6564			Regenerated	17.5824	27.2109	20.3883	18.0392		82.4176	72.7891	79.6117	81.9608
	Intact	19.1A	K8	196	227	86.3436
	Intact	19.1B	K5	25	231	10.8225
	Intact	19.1B	K8	206	231	89.1775
	Castrated	19.1D	K5	33	150	22
	Castrated	19.1D	K8	117	150	78		Comparison	p-value (two-tailed unpaired t-test)
	Intact	19.1E	K5	12	91	13.1868		Intact vs Castrated	0.022
	Intact	19.1E	K8	79	91	86.8132		Castrated vs Regenerated	0.0308
	Castrated	15.3B	K5	47	139	33.8129		Intact vs Regenerated	0.4157
	Castrated	15.3B	K8	92	139	66.1871
	Castrated	15.3E	K5	71	269	26.3941
	Castrated	15.3E	K8	198	269	73.6059
	Intact	19.2A	K5	35	309	11.3269
	Intact	19.2A	K8	274	309	88.6731
	Regenerated	19.3B	K5	48	273	17.5824
	Regenerated	19.3B	K8	225	273	82.4176
	Regenerated	19.3C	K5	40	147	27.2109
	Regenerated	19.3C	K8	107	147	72.7891
	Regenerated	21.2A	K5	42	206	20.3883
	Regenerated	21.2A	K8	164	206	79.6117
	Regenerated	21.2C	K5	46	255	18.0392
	Regenerated	21.2C	K8	209	255	81.9608

## Sheet: Figure 4I
Figure 4I	mouse.id	treatment	# RFP+ cells	# RFP+ NKX3.1+	% NKX3.1+ in RFP	% NKX3.1- in RFP
	19.2A	Intact	24	2	7.69231	92.3077
	19.1A	Intact	52	2	3.7037	96.2963		Summary data		% NKX3.1+					% NKX3.1-
	16.1D	Intact	19	1	5	95			Intact	7.7	3.7	5			92.3	96.3	95
	19.1D	Castrated	8	0	0	100			Castrated	0	0	10	0	3	100	100	90	100	97
	15.1C	Castrated	19	0	0	100			Regenerated	8.3	0	0	6.8		91.7	100	100	93.2
	15.3E	Castrated	45	5	10	90
	15.3B	Castrated	9	0	0	100
	21.3B	Castrated	128	4	3.0303	96.9697
	21.2C	Regenerated	11	1	8.33333	91.6667
	21.2A	Regenerated	16	0	0	100		Comparison	p-value (two-tailed unpaired t-test)
	19.3C	Regenerated	26	0	0	100		Intact vs Castrated	0.3851
	19.3B	Regenerated	41	3	6.81818	93.1818		Castrated vs Regenerated	0.7151
								Intact vs Regenerated	0.57
