# Supplementary material for: RUNX1 marks a luminal castration-resistant lineage established at the onset of prostate development
Source: eLife journal article supplement (doi:10.7554/elife.60225), 2020-10-07
Supplement: supp [file elife-60225-supp-v1.zip › elife_poa_e60225_Figure_5_figure_supplement_2_source_data_1.xlsx]

## Sheet: Figure 5 - Figure supplement 2B
Figure 5 - Figure supplement 2B	Cell type	Replicate	Day	# cells	Percentage		Summary data		K5+				K5+K8+				K8+
	K5	D0_1_E1	D0	242	15.0779			D0	15.0779	7.47664			83.1776	91.2967			1.74455	1.22664
	K5	D0_1_E2	D0	128	7.47664			D1	11.6959	5.11247	4.80382		87.1345	91.5644	93.5362		1.16959	3.32311	1.65996
	K5K8	D0_1_E1	D0	1335	83.1776			D2	11.0866	12.6324	24.6733		84.9731	84.033	69.0626		3.94028	3.33464	6.26408
	K5K8	D0_1_E2	D0	1563	91.2967			D7	34.3353	21.6711	40.9472	30.2726	60.4276	69.5583	50.0999	63.0315	5.23706	8.77062	8.95284	6.69586
	K8	D0_1_E1	D0	28	1.74455
	K8	D0_1_E2	D0	21	1.22664
	K5	D1_B1_E1	D1	340	11.6959
	K5	D1_B1_E2	D1	200	5.11247
	K5	D1_B1_E3	D1	191	4.80382
	K5K8	D1_B1_E1	D1	2533	87.1345
	K5K8	D1_B1_E2	D1	3582	91.5644
	K5K8	D1_B1_E3	D1	3719	93.5362
	K8	D1_B1_E1	D1	34	1.16959
	K8	D1_B1_E2	D1	130	3.32311
	K8	D1_B1_E3	D1	66	1.65996
	K5	D2_A2_E1	D2	453	11.0866
	K5	D2_A2_E2	D2	322	12.6324
	K5	D2_A2_E3	D2	1095	24.6733
	K5K8	D2_A2_E1	D2	3472	84.9731
	K5K8	D2_A2_E2	D2	2142	84.033
	K5K8	D2_A2_E3	D2	3065	69.0626
	K8	D2_A2_E1	D2	161	3.94028
	K8	D2_A2_E2	D2	85	3.33464
	K8	D2_A2_E3	D2	278	6.26408
	K5	D7_B2_E1	D7	2216	34.3353
	K5	D7_B2_E2	D7	2036	21.6711
	K5	D7_B2_E3	D7	2049	40.9472
	K5	D7_B2_E4	D7	2143	30.2726
	K5K8	D7_B2_E1	D7	3900	60.4276
	K5K8	D7_B2_E2	D7	6535	69.5583
	K5K8	D7_B2_E3	D7	2507	50.0999
	K5K8	D7_B2_E4	D7	4462	63.0315
	K8	D7_B2_E1	D7	338	5.23706
	K8	D7_B2_E2	D7	824	8.77062
	K8	D7_B2_E3	D7	448	8.95284
	K8	D7_B2_E4	D7	474	6.69586
