# Supplementary material for: RUNX1 marks a luminal castration-resistant lineage established at the onset of prostate development
Source: eLife journal article supplement (doi:10.7554/elife.60225), 2020-10-07
Supplement: supp [file elife-60225-supp-v1.zip › elife_poa_e60225_Figure_5_source_data_1.xlsx]

## Sheet: Figure 5H
Figure 5H		RUNX1+ NKX3.1+							RUNX1+ NKX3.1-							RUNX1- NKX3.1+							RUNX1- NKX3.1-
	D0	0	0	0					37.9518	21.3195	32.4203					0	0	0					62.0482	78.6805	67.5797
	D1	19.2533	14.214	28.9746	39.3939	11.2322	5.41803	4.38637	64.4949	66.8339	57.667	44.5221	42.6236	46.1467	57.3962	0.146413	4.12486	4.2333	9.79021	0.502934	0.0934143	0.373308	16.1054	14.8272	9.12512	6.29371	45.6412	48.3419	37.8441
	D2	5.76037	3.16839	8.59992	16.2846	13.8321	2.36111		48.7711	52.1894	36.3523	57.0304	52.0916	27.5694		19.086	20.3987	22.5592	5.81594	10.0458	11.3889		26.3825	24.2435	32.4886	20.869	24.0305	58.6806
	D7	0.041511	2.4106	3.13093	0.569801	2.11648	10.3832		5.06434	23.1788	22.2328	28.9411	38.607	53.637		24.6852	46.2384	37.334	9.71035	25.698	13.1309		70.2089	28.1722	37.3023	60.7787	33.5785	22.8489
