# Supplementary material for: RUNX1 marks a luminal castration-resistant lineage established at the onset of prostate development
Source: eLife journal article supplement (doi:10.7554/elife.60225), 2020-10-07
Supplement: supp [file elife-60225-supp-v1.zip › elife_poa_e60225_Figure_7_figure_supplement_1_source_data_1.xlsx]

## Sheet: Figure 7C
Figure 7C	Population	Replicate	Day	# RFP+ cells	Percentage		Summary data		D2						D7						p-value (two-tailed unpaired t-test)
	RFP+p63+	D2_A2_E1	D2	158	58.9552			RFP+ p63+	58.9552	38.8889	48.4536	59.4595	66.6667	52.5862	23.1579	37.4847	40.1734	35.9133	65.8333		0.6042
	RFP+p63+	D2_A2_E2	D2	70	38.8889
	RFP+p63+	D2_C1_E1	D2	94	48.4536
	RFP+p63+	D2_D1_E1	D2	22	59.4595
	RFP+p63+	D2_D1_E2	D2	18	66.6667
	RFP+p63+	D2_D1_E3	D2	61	52.5862
	RFP+p63+	D7_A3_E1	D7	44	23.1579
	RFP+p63+	D7_C2_E1	D7	307	37.4847
	RFP+p63+	D7_C2_E2	D7	139	40.1734
	RFP+p63+	D7_C3_E1	D7	116	35.9133
	RFP+p63+	D7_C3_E2	D7	158	65.8333

## Sheet: Figure 7E
Figure 7E	Population	Day	Replicate	# RFP+ cells	Percentage		Summary data		D2				D7				p-value (two-tailed unpaired t-test)
	K5	D2	D2_A2_E1	1	2.94118			K8+	0	2.06186	4.34783	0	3.30579	14.2202	11.5497		0.0434
	K5	D2	D2_D1_E1	13	13.4021			K5+K8+	97.0588	84.5361	95.6522	90.4762	73.2782	67.8899	78.0702		0.0063
	K5	D2	D2_D1_E2	0	0			K5+	2.94118	13.4021	0	9.52381	23.416	17.8899	10.3801		0.0749
	K5	D2	D2_D1_E3	12	9.52381
	K5K8	D2	D2_A2_E1	33	97.0588
	K5K8	D2	D2_D1_E1	82	84.5361
	K5K8	D2	D2_D1_E2	66	95.6522
	K5K8	D2	D2_D1_E3	114	90.4762
	K8	D2	D2_A2_E1	0	0
	K8	D2	D2_D1_E1	2	2.06186
	K8	D2	D2_D1_E2	3	4.34783
	K8	D2	D2_D1_E3	0	0
	K5	D7	D7_A3_E1	85	23.416
	K5	D7	D7_C3_E1	39	17.8899
	K5	D7	D7_C3_E2	71	10.3801
	K5K8	D7	D7_A3_E1	266	73.2782
	K5K8	D7	D7_C3_E1	148	67.8899
	K5K8	D7	D7_C3_E2	534	78.0702
	K8	D7	D7_A3_E1	12	3.30579
	K8	D7	D7_C3_E1	31	14.2202
	K8	D7	D7_C3_E2	79	11.5497

## Sheet: Figure 7H
Figure 7H	Population	Replicate	Day	# RFP+ cells	Percentage		Summary data		D2			D7					p-value (two-tailed unpaired t-test)
	RFP+Nupr1+	D2_D1_E1	D2	7	18.4211			RFP+ Nupr1+	18.4211	27.2727	24.2424	41.3146	28.7356	30.303	34.1216		0.0483
	RFP+Nupr1+	D2_D1_E2	D2	12	27.2727
	RFP+Nupr1+	D2_D1_E3	D2	24	24.2424
	RFP+Nupr1+	D7_C2_E1	D7	88	41.3146
	RFP+Nupr1+	D7_C2_E2	D7	100	28.7356
	RFP+Nupr1+	D7_C3_E1	D7	20	30.303
	RFP+Nupr1+	D7_C3_E2	D7	101	34.1216
