# Supplementary material for: RUNX1 marks a luminal castration-resistant lineage established at the onset of prostate development
Source: eLife journal article supplement (doi:10.7554/elife.60225), 2020-10-07
Supplement: supp [file elife-60225-supp-v1.zip › elife_poa_e60225_Figure_7_source_data_1.xlsx]

## Sheet: Figure 7D
Figure 7D	Population	Replicate	Day	# RFP+ cells	Percentage RFP+ RUNX1+		Summary data		D2							D7					p-value (two-tailed unpaired t-test)
	RFP+RUNX1+	D2_A2_E1	D2	108	92.3077			RFP+ RUNX1+	92.3077	94	87.5	79.4118	78	92.3077	61.4407	73.5849	77.0677	79.3594	78.5263		0.3143
	RFP+RUNX1+	D2_A2_E2	D2	47	94
	RFP+RUNX1+	D2_C1_E2	D2	42	87.5
	RFP+RUNX1+	D2_D1_E1	D2	54	79.4118
	RFP+RUNX1+	D2_D1_E2	D2	39	78
	RFP+RUNX1+	D2_D1_E3	D2	240	92.3077
	RFP+RUNX1-	D2_A2_E1	D2	9	7.69231
	RFP+RUNX1-	D2_A2_E2	D2	3	6
	RFP+RUNX1-	D2_C1_E2	D2	6	12.5
	RFP+RUNX1-	D2_D1_E1	D2	14	20.5882
	RFP+RUNX1-	D2_D1_E2	D2	11	22
	RFP+RUNX1-	D2_D1_E3	D2	20	7.69231
	RFP+RUNX1+	D7_A3_E1	D7	145	61.4407
	RFP+RUNX1+	D7_C2_E1	D7	117	73.5849
	RFP+RUNX1+	D7_C2_E2	D7	205	77.0677
	RFP+RUNX1+	D7_C3_E1	D7	223	79.3594
	RFP+RUNX1+	D7_C3_E2	D7	373	78.5263
	RFP+RUNX1-	D7_A3_E1	D7	91	38.5593
	RFP+RUNX1-	D7_C2_E1	D7	42	26.4151
	RFP+RUNX1-	D7_C2_E2	D7	61	22.9323
	RFP+RUNX1-	D7_C3_E1	D7	58	20.6406
	RFP+RUNX1-	D7_C3_E2	D7	102	21.4737

## Sheet: Figure 7G
Figure 7G	Population	Replicate	Day	# RFP+ cells	Percentage RFP+ NKX3.1+		Summary data		D2							D7				p-value (two-tailed unpaired t-test)
	RFP+NKX3.1+	D2_A2_E1	D2	11	5.82011			RFP+ NKX3.1+		5.82011	9.16667	0	9.7561	12.963	2.0202	19.7817	8.46995	12.0192		0.1066
	RFP+NKX3.1+	D2_A2_E2	D2	11	9.16667
	RFP+NKX3.1+	D2_C1_E1	D2	0	0
	RFP+NKX3.1+	D2_D1_E1	D2	12	9.7561
	RFP+NKX3.1+	D2_D1_E2	D2	7	12.963
	RFP+NKX3.1+	D2_D1_E3	D2	2	2.0202
	RFP+NKX3.1+	D7_A3_E1	D7	145	19.7817
	RFP+NKX3.1+	D7_C3_E1	D7	31	8.46995
	RFP+NKX3.1+	D7_C3_E2	D7	25	12.0192

## Sheet: Figure 7J
Figure 7J	Population	Day	Replicate	# RFP+ cells	Percentage RFP+ K4+		Summary data		D2			D7				p-value (two-tailed unpaired t-test)
	RFP+ K4+	D2	D2_A2_E1	59	45.0382			RFP+ K4+	45.0382	65.5556	60	72.7405	72.0497	77.5362		0.0536
	RFP+ K4+	D2	D2_A2_E2	177	65.5556
	RFP+ K4+	D2	D2_D1_E2	9	60
	RFP+ K4+	D7	D7_A3_E1	499	72.7405
	RFP+ K4+	D7	D7_C2_E1	116	72.0497
	RFP+ K4+	D7	D7_C2_E2	535	77.5362
