# Supplementary material for: RUNX1 marks a luminal castration-resistant lineage established at the onset of prostate development
Source: eLife journal article supplement (doi:10.7554/elife.60225), 2020-10-07
Supplement: supp [file elife-60225-supp-v1.zip › elife_poa_e60225_Supplementary_file_2.xlsx]

## Sheet: Table S5
Supplementary file 2. Genes differentially expressed between adult clusters
gene	p_val	avg_logFC	pct.1	pct.2	p_val_adj	cluster
Sbp	0	4.58697	1	0.998	0	Lum-A
Sbpl	0	4.37478	0.996	0.589	0	Lum-A
Spink1	0	4.34216	1	0.938	0	Lum-A
9530002B09Rik	0	2.17671	1	0.678	0	Lum-A
5430419D17Rik	0	1.66921	0.996	0.394	0	Lum-A
BB123696	0	1.50907	0.862	0.042	0	Lum-A
Abo	0	1.46392	0.993	0.23	0	Lum-A
Crabp1	0	1.18863	0.917	0.027	0	Lum-A
Nucb2	0	1.15037	0.987	0.386	0	Lum-A
Asrgl1	0	1.11541	0.987	0.227	0	Lum-A
Lrrc52	0	0.322893	0.722	0.015	0	Lum-A
Rplp0	0	-0.718557	1	0.998	0	Lum-A
Eef1a1	0	-0.730102	1	0.999	0	Lum-A
Oaz1	0	-0.735942	0.996	0.989	0	Lum-A
Rps6	0	-0.789345	0.995	0.996	0	Lum-A
Pfdn5	0	-0.807662	0.987	0.986	0	Lum-A
Naca	0	-0.825803	0.995	0.996	0	Lum-A
Rpl15	0	-0.857189	0.995	0.995	0	Lum-A
Rpl32	0	-0.857468	0.998	0.998	0	Lum-A
Rplp2	0	-0.874192	1	0.997	0	Lum-A
Rpl35	0	-0.88849	0.995	0.994	0	Lum-A
Rpl6	0	-0.895997	0.998	0.999	0	Lum-A
Rps23	0	-0.904269	1	0.996	0	Lum-A
Rpl14	0	-0.907235	0.998	0.995	0	Lum-A
Rps4x	0	-0.910133	1	0.997	0	Lum-A
Rpl11	0	-0.911213	0.998	0.997	0	Lum-A
Rps24	0	-0.921613	1	0.999	0	Lum-A
Rpl24	0	-0.921706	0.998	0.996	0	Lum-A
Rpl22	0	-0.924885	0.996	0.994	0	Lum-A
Rpl23	0	-0.930231	1	0.998	0	Lum-A
Rpl18	0	-0.936541	0.998	0.997	0	Lum-A
Rps3a1	0	-0.941562	0.998	0.998	0	Lum-A
Rps2	0	-0.946311	1	0.992	0	Lum-A
Rpl26	0	-0.948689	0.996	0.997	0	Lum-A
Rpl17	0	-0.94911	1	0.997	0	Lum-A
Rps12	0	-0.951137	1	0.998	0	Lum-A
Myl6	0	-0.95283	0.989	0.987	0	Lum-A
Rpl10a	0	-0.953226	1	0.998	0	Lum-A
Rpl19	0	-0.953435	1	0.998	0	Lum-A
Rpl5	0	-0.953506	0.991	0.996	0	Lum-A
Rps13	0	-0.955083	0.996	0.997	0	Lum-A
Rps25	0	-0.955142	0.998	0.995	0	Lum-A
Rpl3	0	-0.959905	0.995	0.998	0	Lum-A
Rps14	0	-0.96425	1	0.997	0	Lum-A
Rpl4	0	-0.96715	0.991	0.996	0	Lum-A
Hnrnpa0	0	-0.968319	0.946	0.942	0	Lum-A
Rpl34	0	-0.977585	0.996	0.996	0	Lum-A
Rps9	0	-0.979168	1	0.997	0	Lum-A
Rpl36	0	-0.979872	1	0.999	0	Lum-A
Rps7	0	-0.985256	0.996	0.997	0	Lum-A
Rps20	0	-0.985446	0.996	0.998	0	Lum-A
Fau	0	-0.987192	1	0.999	0	Lum-A
Rpl9	0	-0.993629	0.998	0.995	0	Lum-A
Rpl12	0	-0.997733	0.996	0.995	0	Lum-A
Rps27a	0	-0.9995	0.996	0.997	0	Lum-A
Rpl21	0	-1.00168	1	0.997	0	Lum-A
Rps26	0	-1.003	0.998	0.997	0	Lum-A
Hsp90ab1	0	-1.01115	0.993	0.999	0	Lum-A
Arpc2	0	-1.01825	0.949	0.929	0	Lum-A
Rack1	0	-1.02519	1	0.994	0	Lum-A
Rps15a	0	-1.02747	0.998	0.997	0	Lum-A
Rpl37a	0	-1.02776	1	0.998	0	Lum-A
Rps3	0	-1.03132	0.998	0.996	0	Lum-A
Rps8	0	-1.0389	1	0.999	0	Lum-A
Rpl8	0	-1.04296	0.998	0.997	0	Lum-A
Atpif1	0	-1.04508	0.964	0.965	0	Lum-A
Rpl28	0	-1.05662	0.998	0.999	0	Lum-A
Rpl23a	0	-1.06882	0.993	0.993	0	Lum-A
Hmgb1	0	-1.07569	0.944	0.965	0	Lum-A
Rpl27a	0	-1.09655	0.998	0.998	0	Lum-A
Rpsa	0	-1.10352	1	0.999	0	Lum-A
Rpl30	0	-1.10832	0.996	0.997	0	Lum-A
Eif1	0	-1.12148	0.993	0.996	0	Lum-A
Rps10	0	-1.12543	1	0.997	0	Lum-A
Rpl35a	0	-1.12714	1	0.996	0	Lum-A
Rps11	0	-1.1521	0.995	0.997	0	Lum-A
Rps15	0	-1.17406	1	0.996	0	Lum-A
Ddx5	0	-1.2014	0.984	0.982	0	Lum-A
Aldh2	0	-1.20322	0.956	0.924	0	Lum-A
Rps19	0	-1.21498	1	0.998	0	Lum-A
Fth1	0	-1.22455	0.995	0.992	0	Lum-A
Rpl18a	0	-1.23338	1	0.997	0	Lum-A
Ftl1	0	-1.24995	0.989	0.993	0	Lum-A
Rps5	0	-1.26371	0.998	0.996	0	Lum-A
Rpl7	0	-1.2652	0.995	0.996	0	Lum-A
Rpl13	0	-1.27566	1	0.999	0	Lum-A
Map1lc3a	0	-1.28225	0.909	0.936	0	Lum-A
Ncl	0	-1.28739	0.955	0.974	0	Lum-A
Tpt1	0	-1.28868	1	0.999	0	Lum-A
App	0	-1.31302	0.517	0.872	0	Lum-A
Ptma	0	-1.32716	0.998	0.997	0	Lum-A
Rps16	0	-1.34717	0.996	0.998	0	Lum-A
Rps27	0	-1.38095	0.998	0.996	0	Lum-A
Actb	0	-1.41165	0.995	0.991	0	Lum-A
Cd9	0	-1.46027	0.911	0.951	0	Lum-A
Hspb1	0	-1.51076	0.927	0.977	0	Lum-A
Gas6	0	-1.62349	0.114	0.896	0	Lum-A
S100a10	0	-1.86347	0.603	0.767	0	Lum-A
Tmem176b	0	-1.90292	0.9	0.962	0	Lum-A
Tmsb4x	0	-2.06574	0.984	0.995	0	Lum-A
Dcn	0	-2.95186	0.408	0.626	0	Lum-A
Cfl1	1.48219693752374e-323	-1.04732	0.936	0.911	4.60266615009247e-319	Lum-A
Rplp1	8.39911597930119e-323	-0.858709	1	0.998	2.6081774850524e-318	Lum-A
Calm2	1.28457067918724e-322	-1.19224	0.938	0.95	3.98897733008014e-318	Lum-A
Gchfr	7.0157321709457e-322	0.683109	0.955	0.154	2.17859531104377e-317	Lum-A
Hnrnpf	4.14521076860806e-321	-0.871966	0.94	0.917	1.28721229997586e-316	Lum-A
Rnf186	2.34622909201993e-315	0.605237	0.789	0.05	7.2857451994495e-311	Lum-A
Eif3f	4.63783706782525e-315	-0.828932	0.978	0.966	1.44018754467177e-310	Lum-A
Atp2c2	1.05088170664806e-312	0.362982	0.759	0.042	3.2633e-308	Lum-A
Krt15	1.06519532321488e-311	-3.46295	0.33	0.744	3.30775e-307	Lum-A
Rps17	1.42547949387666e-311	-0.909675	0.993	0.992	4.42654e-307	Lum-A
Btf3	0	-0.72294	0.987	0.98	4.26651e-305	Lum-A
Pabpc1	1.98529e-304	-0.95796	0.969	0.944	6.16493e-300	Lum-A
Rps18	3.65919e-303	-0.77746	0.995	0.994	1.13629e-298	Lum-A
Rpl36a	9.46514e-302	-0.905968	0.996	0.99	2.93921e-297	Lum-A
Csta1	1.87587e-295	0.570284	0.648	0.016	5.82515e-291	Lum-A
Tmem176a	3.73219e-294	-1.64991	0.926	0.946	1.15896e-289	Lum-A
Ybx1	4.60782e-294	-0.871562	0.967	0.966	1.43087e-289	Lum-A
Azgp1	1.26745e-293	0.577182	0.884	0.121	3.93581e-289	Lum-A
Npm1	2.6588e-293	-0.912383	0.991	0.983	8.25637e-289	Lum-A
H3f3b	4.74232e-293	-0.957014	0.995	0.998	1.47263e-288	Lum-A
Slc26a4	2.31937e-292	0.313126	0.702	0.032	7.20235e-288	Lum-A
Eif4a1	1.51791e-291	-1.08067	0.971	0.968	4.71358e-287	Lum-A
Apof	2.07199e-289	0.849537	0.917	0.148	6.43415e-285	Lum-A
Nfib	2.8758e-289	-0.927334	0.84	0.888	8.93021e-285	Lum-A
St6galnac4	6.84862e-288	0.333667	0.679	0.03	2.1267e-283	Lum-A
Rps21	2.81858e-287	-0.917744	0.998	0.997	8.75255e-283	Lum-A
Timp4	2.73708e-286	0.839564	0.975	0.217	8.49946e-282	Lum-A
Kcnk3	1.94403e-285	0.791733	0.577	0.005	6.03679e-281	Lum-A
Hspa8	3.1528e-284	-0.895385	0.998	0.995	9.7904e-280	Lum-A
Aplp2	1.7662e-283	-1.06053	0.831	0.889	5.48457e-279	Lum-A
Pfn1	2.70022e-279	-0.861123	0.975	0.949	8.38498e-275	Lum-A
Fam25c	9.39756e-279	0.49937	0.768	0.067	2.91822e-274	Lum-A
Hmgn1	3.22439e-277	-0.773321	0.971	0.953	1.00127e-272	Lum-A
Nsa2	5.65128e-277	-0.811833	0.931	0.905	1.75489e-272	Lum-A
Anp32b	6.31078e-277	-0.829114	0.86	0.861	1.95969e-272	Lum-A
Rps29	1.41872e-276	-0.791493	1	0.999	4.40554e-272	Lum-A
Rpl39	3.13539e-275	-0.82899	0.996	0.994	9.73632e-271	Lum-A
Ptms	4.41904e-275	-1.00466	0.726	0.866	1.37224e-270	Lum-A
Wfdc3	2.2176e-273	1.71309	0.875	0.151	6.88631e-269	Lum-A
Serbp1	7.46622e-273	-0.779245	0.973	0.967	2.31849e-268	Lum-A
Set	1.92627e-272	-0.798836	0.953	0.917	5.98164e-268	Lum-A
Pgap2	1.82966e-269	0.909642	0.989	0.629	5.68163e-265	Lum-A
Fndc5	4.08092e-269	0.265722	0.733	0.07	1.26725e-264	Lum-A
H3f3a	2.76578e-267	-0.815489	0.991	0.979	8.58859e-263	Lum-A
Myl12a	3.63424e-267	-1.10027	0.897	0.917	1.12854e-262	Lum-A
Snrpb	1.64695e-266	-0.780028	0.898	0.874	5.11427e-262	Lum-A
Col6a3	2.43051e-266	0.589592	0.632	0.024	7.54748e-262	Lum-A
Dcaf12l1	1.89963e-265	0.419178	0.673	0.035	5.89894e-261	Lum-A
Arpc1b	9.09253e-265	-0.91451	0.902	0.895	2.8235e-260	Lum-A
Itgb1	1.61996e-264	-1.10497	0.574	0.847	5.03045e-260	Lum-A
Rbm39	1.52074e-263	-0.79482	0.962	0.952	4.72235e-259	Lum-A
Oat	1.77035e-263	-1.24517	0.884	0.908	5.49746e-259	Lum-A
Tpm1	2.8234e-260	-1.75044	0.804	0.87	8.76751e-256	Lum-A
Ctsd	3.78228e-260	-0.897525	0.938	0.893	1.17451e-255	Lum-A
Cdc42	9.43981e-260	-0.726241	0.933	0.885	2.93134e-255	Lum-A
Uqcrh	5.14202e-259	-0.672296	0.985	0.98	1.59675e-254	Lum-A
Ppia	1.10355e-258	-0.679272	0.998	0.992	3.42685e-254	Lum-A
Eef1b2	1.4802e-258	-0.64873	0.998	0.991	4.59645e-254	Lum-A
Ywhaz	3.19585e-257	-0.821207	0.873	0.862	9.92406e-253	Lum-A
Apoe	4.63875e-256	-3.82917	0.466	0.71	1.44047e-251	Lum-A
Aldh1a1	1.80851e-255	-0.902366	0.795	0.616	5.61596e-251	Lum-A
Id3	7.05406e-254	-1.88393	0.187	0.79	2.1905e-249	Lum-A
Scgb2b27	9.12189e-252	3.52218	0.835	0.208	2.83262e-247	Lum-A
Gclm	5.44229e-251	-0.720947	0.831	0.79	1.68999e-246	Lum-A
Slc9a2	7.32886e-251	0.360539	0.808	0.111	2.27583e-246	Lum-A
Chchd2	1.04601e-250	-0.665529	0.998	0.988	3.24817e-246	Lum-A
Hnrnpk	8.16878e-250	-0.758778	0.946	0.92	2.53665e-245	Lum-A
Rpl7a	1.24574e-249	-0.618227	0.996	0.992	3.8684e-245	Lum-A
Eif4g2	1.24271e-247	-0.758992	0.975	0.953	3.85898e-243	Lum-A
Snrpd2	1.32725e-247	-0.62857	0.926	0.86	4.12151e-243	Lum-A
Nupr1	3.69456e-247	1.56069	0.975	0.308	1.14727e-242	Lum-A
Hnrnpu	7.63977e-247	-0.914645	0.929	0.914	2.37238e-242	Lum-A
Dnaja1	2.01894e-246	-1.11281	0.975	0.959	6.26942e-242	Lum-A
Purb	3.8429e-246	-0.868908	0.907	0.894	1.19334e-241	Lum-A
Sfpq	1.44683e-245	-0.922005	0.833	0.85	4.49284e-241	Lum-A
Bmpr1b	1.5245e-245	0.413494	0.853	0.147	4.73403e-241	Lum-A
Ube2d3	2.92116e-245	-0.706832	0.944	0.905	9.07108e-241	Lum-A
Errfi1	1.27683e-243	-1.82507	0.719	0.85	3.96495e-239	Lum-A
Gnai2	2.6396e-242	-0.632478	0.891	0.828	8.19675e-238	Lum-A
Ktn1	1.04692e-240	-0.820999	0.82	0.834	3.251e-236	Lum-A
Pcbp2	3.0239e-240	-0.622095	0.884	0.841	9.39011e-236	Lum-A
Hnrnpab	8.03608e-240	-0.793571	0.927	0.891	2.49544e-235	Lum-A
Eif3e	9.81937e-240	-0.640063	0.935	0.889	3.04921e-235	Lum-A
Nedd4	8.74391e-239	-0.791656	0.935	0.909	2.71525e-234	Lum-A
Rpl31	9.01465e-239	-0.738078	0.995	0.985	2.79932e-234	Lum-A
Capns1	1.06716e-238	-0.771322	0.913	0.872	3.31386e-234	Lum-A
Rpl13a	1.2225e-238	-0.684007	0.906	0.881	3.79622e-234	Lum-A
Ifitm3	4.37019e-238	-1.56514	0.884	0.823	1.35708e-233	Lum-A
Atp5g2	1.23086e-237	-0.661003	0.985	0.961	3.8222e-233	Lum-A
Selenow	1.31185e-236	-0.713386	0.911	0.897	4.0737e-232	Lum-A
Hnrnpa1	2.87181e-236	-0.816887	0.797	0.836	8.91782e-232	Lum-A
Ubxn1	5.15426e-236	-0.608926	0.924	0.846	1.60055e-231	Lum-A
Oit1	7.46408e-236	0.607234	0.967	0.275	2.31782e-231	Lum-A
Nenf	2.01323e-235	-0.755595	0.779	0.838	6.25168e-231	Lum-A
Eef1d	4.00916e-235	-0.682155	0.989	0.954	1.24497e-230	Lum-A
Snrpe	1.26502e-234	-0.574912	0.917	0.827	3.92826e-230	Lum-A
Rpl37	2.29899e-234	-0.815499	1	0.997	7.13904e-230	Lum-A
Sat1	5.54233e-234	-1.25399	0.848	0.897	1.72106e-229	Lum-A
Nfix	7.34626e-233	-0.86845	0.92	0.895	2.28123e-228	Lum-A
Rhoa	2.18787e-232	-0.645264	0.955	0.914	6.794e-228	Lum-A
Atp5d	2.1954e-232	-0.652665	0.975	0.953	6.81736e-228	Lum-A
Tspo	1.77364e-231	-0.795768	0.897	0.864	5.50769e-227	Lum-A
Prrc2c	9.85209e-230	-0.809718	0.904	0.903	3.05937e-225	Lum-A
Ctnna1	2.11462e-229	-0.697084	0.799	0.791	6.56652e-225	Lum-A
Cmtm8	3.47803e-229	0.44624	0.902	0.2	1.08003e-224	Lum-A
Lrrc26	1.29573e-228	0.308024	0.915	0.276	4.02364e-224	Lum-A
Ywhae	1.4576e-228	-0.649563	0.953	0.918	4.5263e-224	Lum-A
Sf3b2	6.60413e-228	-0.485745	0.906	0.771	2.05078e-223	Lum-A
Csnk1a1	1.64332e-227	-0.650867	0.949	0.906	5.103e-223	Lum-A
Ank	4.29578e-227	0.690684	0.851	0.162	1.33397e-222	Lum-A
Srrm2	4.959e-227	-0.849152	0.955	0.962	1.53992e-222	Lum-A
Eef2	1.99006e-226	-0.714481	0.995	0.989	6.17974e-222	Lum-A
Ube2b	3.16139e-226	-0.607002	0.926	0.851	9.81706e-222	Lum-A
Slc25a4	1.02523e-225	-0.773169	0.686	0.781	3.18365e-221	Lum-A
Anxa2	1.81657e-225	-1.13835	0.882	0.842	5.64098e-221	Lum-A
Ramp1	2.72164e-225	0.400278	0.907	0.225	8.45152e-221	Lum-A
Smarca5	7.09725e-225	-0.744021	0.878	0.841	2.20391e-220	Lum-A
H2afz	1.73267e-224	-0.883289	0.984	0.948	5.38046e-220	Lum-A
Fam174b	3.40424e-224	0.415973	0.92	0.23	1.05712e-219	Lum-A
Mcl1	5.60579e-224	-0.869339	0.878	0.854	1.74076e-219	Lum-A
Id1	1.01016e-223	-2.03035	0.23	0.768	3.13686e-219	Lum-A
Fus	1.29695e-223	-0.777929	0.829	0.818	4.02741e-219	Lum-A
Mgst1	1.76872e-223	-1.09498	0.552	0.738	5.49239e-219	Lum-A
Snu13	7.31956e-222	-0.883087	0.904	0.885	2.27294e-217	Lum-A
Ywhab	1.02585e-221	-0.655261	0.819	0.79	3.18559e-217	Lum-A
Rpl38	1.04975e-221	-0.794649	1	0.995	3.2598e-217	Lum-A
Mrps6	1.15753e-221	-0.966533	0.633	0.769	3.59449e-217	Lum-A
Actn4	4.73809e-221	-0.66088	0.808	0.773	1.47132e-216	Lum-A
S100a16	6.41799e-221	-0.818849	0.768	0.779	1.99298e-216	Lum-A
Csde1	8.6653e-221	-0.56053	0.878	0.787	2.69083e-216	Lum-A
Slc25a3	1.12222e-220	-0.660233	0.98	0.948	3.48483e-216	Lum-A
Bzw1	1.29164e-220	-0.688028	0.857	0.797	4.01092e-216	Lum-A
Gmppb	2.70448e-220	0.274664	0.877	0.223	8.39821e-216	Lum-A
Cst3	4.18251e-220	-0.855007	0.985	0.967	1.29879e-215	Lum-A
Rock2	9.34196e-219	-1.00713	0.575	0.777	2.90096e-214	Lum-A
Ptp4a2	9.36519e-219	-0.614821	0.873	0.774	2.90817e-214	Lum-A
S100a11	1.13717e-218	-1.34177	0.877	0.886	3.53124e-214	Lum-A
Slc7a4	5.33913e-218	0.258593	0.887	0.235	1.65796e-213	Lum-A
Senp6	3.27177e-217	-0.562714	0.8	0.741	1.01598e-212	Lum-A
Eif3h	3.92994e-216	-0.628965	0.971	0.938	1.22036e-211	Lum-A
Nop53	1.10203e-215	-0.690601	0.739	0.78	3.42212e-211	Lum-A
5330417C22Rik	1.71944e-215	0.48001	0.958	0.293	5.33936e-211	Lum-A
G3bp1	2.11762e-215	-0.578906	0.762	0.712	6.57585e-211	Lum-A
C2cd4a	2.9915e-215	0.375613	0.501	0.013	9.28949e-211	Lum-A
Etf1	4.43185e-215	-0.742859	0.882	0.8	1.37622e-210	Lum-A
Ywhaq	5.67426e-215	-0.527042	0.887	0.786	1.76203e-210	Lum-A
Gdpd1	6.76145e-215	0.553088	0.953	0.277	2.09963e-210	Lum-A
Hnrnpa3	1.35316e-213	-0.772179	0.926	0.904	4.20197e-209	Lum-A
Hectd1	1.07352e-212	-0.542236	0.819	0.751	3.3336e-208	Lum-A
Ezr	1.54948e-212	-0.859664	0.973	0.94	4.8116e-208	Lum-A
Atxn7l3b	1.73022e-212	-0.568483	0.866	0.77	5.37284e-208	Lum-A
Eif6	2.39246e-212	-0.57795	0.824	0.75	7.42932e-208	Lum-A
Actg1	3.57186e-212	-1.03608	0.996	0.993	1.10917e-207	Lum-A
S100a6	1.42665e-211	-2.59871	0.245	0.728	4.43018e-207	Lum-A
Slc3a2	1.80128e-211	-0.72269	0.766	0.762	5.5935e-207	Lum-A
Wls	4.04147e-211	-0.966315	0.43	0.765	1.255e-206	Lum-A
Cebpb	2.71923e-210	-1.50423	0.432	0.781	8.44403e-206	Lum-A
Pdlim4	9.04647e-210	-0.977959	0.31	0.76	2.8092e-205	Lum-A
Pafah1b1	1.20413e-209	-0.645182	0.927	0.856	3.73918e-205	Lum-A
Ankrd11	1.36055e-209	-0.729079	0.757	0.769	4.22492e-205	Lum-A
Sub1	1.7329e-209	-0.669872	0.982	0.902	5.38117e-205	Lum-A
Eif3k	2.51006e-209	-0.585253	0.966	0.926	7.79448e-205	Lum-A
Sypl	3.7262e-209	-0.492578	0.768	0.691	1.1571e-204	Lum-A
Hsp90aa1	7.36649e-209	-0.959171	0.956	0.967	2.28752e-204	Lum-A
Cct3	5.20428e-208	-0.491763	0.844	0.731	1.61608e-203	Lum-A
Ccnl1	7.91252e-208	-0.948708	0.817	0.847	2.45708e-203	Lum-A
Cox7a2l	1.01579e-207	-0.643928	0.98	0.952	3.15432e-203	Lum-A
Comt	1.19911e-207	-0.642569	0.739	0.693	3.7236e-203	Lum-A
Capza2	1.32602e-207	-0.465391	0.895	0.751	4.11768e-203	Lum-A
Arpc5	2.06983e-207	-0.48885	0.838	0.727	6.42743e-203	Lum-A
Hnrnpa2b1	4.25289e-207	-0.856478	0.949	0.954	1.32065e-202	Lum-A
Tra2a	4.76317e-207	-0.804148	0.75	0.792	1.47911e-202	Lum-A
Tnfrsf12a	5.42899e-207	-1.51962	0.628	0.731	1.68586e-202	Lum-A
Tbca	9.66809e-207	-0.532812	0.926	0.853	3.00223e-202	Lum-A
F11r	2.11755e-206	-0.659527	0.773	0.752	6.57562e-202	Lum-A
Ybx3	2.56888e-206	-0.854918	0.857	0.833	7.97715e-202	Lum-A
Tst	1.59689e-205	-0.270574	0.864	0.433	4.95883e-201	Lum-A
Nop58	1.78334e-205	-0.982819	0.831	0.805	5.5378e-201	Lum-A
Rab14	3.25026e-205	-0.524902	0.92	0.825	1.0093e-200	Lum-A
U2af1	5.3663e-205	-0.518419	0.922	0.805	1.6664e-200	Lum-A
Prkar1a	1.35591e-204	-0.432018	0.862	0.7	4.2105e-200	Lum-A
Pak2	1.97777e-204	-0.514813	0.889	0.777	6.14156e-200	Lum-A
Dnaja2	5.3108e-204	-0.474195	0.902	0.784	1.64916e-199	Lum-A
Sem1	2.13578e-203	-0.617458	0.967	0.917	6.63224e-199	Lum-A
Use1	4.78596e-203	-0.505222	0.849	0.768	1.48619e-198	Lum-A
Rock1	5.07607e-203	-0.634051	0.824	0.787	1.57627e-198	Lum-A
Hnrnpc	5.48481e-203	-0.60798	0.838	0.802	1.7032e-198	Lum-A
Hspa9	5.55175e-203	-0.581277	0.76	0.724	1.72399e-198	Lum-A
Srsf2	8.90263e-203	-0.712963	0.831	0.816	2.76453e-198	Lum-A
Anxa5	1.48404e-202	-0.827163	0.768	0.769	4.60839e-198	Lum-A
Hspd1	1.59567e-202	-0.636723	0.9	0.835	4.95504e-198	Lum-A
Atf4	1.99178e-202	-0.712067	0.915	0.858	6.18508e-198	Lum-A
Dsp	1.6229e-201	-0.913835	0.615	0.748	5.03958e-197	Lum-A
Atp2b1	1.88419e-201	-0.679168	0.735	0.73	5.85098e-197	Lum-A
Metap2	4.00391e-201	-0.558897	0.895	0.815	1.24334e-196	Lum-A
Ptges3	7.4294e-201	-0.564442	0.913	0.834	2.30705e-196	Lum-A
Tpm3	8.81685e-200	-0.650155	0.846	0.802	2.7379e-195	Lum-A
Gucy2g	9.98881e-200	0.279021	0.534	0.027	3.10183e-195	Lum-A
Ube2i	1.04862e-199	-0.527666	0.815	0.739	3.25627e-195	Lum-A
Ddx3x	4.5562e-199	-0.706779	0.721	0.735	1.41484e-194	Lum-A
Cct7	4.9297e-199	-0.472647	0.902	0.784	1.53082e-194	Lum-A
Phb2	8.36056e-199	-0.475052	0.862	0.764	2.59621e-194	Lum-A
Aprt	1.4122e-198	-0.444915	0.837	0.716	4.38529e-194	Lum-A
Itm2c	1.52266e-198	-0.6622	0.82	0.755	4.72831e-194	Lum-A
Tspan8	1.87637e-198	-1.08612	0.811	0.378	5.8267e-194	Lum-A
Cct8	4.81991e-198	-0.497128	0.877	0.777	1.49673e-193	Lum-A
Trmt112	5.80097e-198	-0.482957	0.811	0.724	1.80138e-193	Lum-A
Sri	1.30849e-197	-0.496694	0.826	0.731	4.06325e-193	Lum-A
Rrp1	1.32994e-197	-0.41878	0.866	0.703	4.12986e-193	Lum-A
Atp5h	2.01906e-197	-0.563688	0.987	0.969	6.26978e-193	Lum-A
Vps28	2.65322e-197	-0.424255	0.878	0.717	8.23905e-193	Lum-A
Mrpl24	2.66642e-197	-0.466237	0.802	0.71	8.28002e-193	Lum-A
Sf3b1	3.87479e-197	-0.749453	0.893	0.896	1.20324e-192	Lum-A
Gsk3b	6.1005e-197	-0.488504	0.791	0.698	1.89439e-192	Lum-A
Pdcd10	6.12116e-197	-0.522176	0.77	0.701	1.9008e-192	Lum-A
Cct2	1.14437e-196	-0.504552	0.927	0.838	3.55362e-192	Lum-A
Nudc	3.72487e-196	-0.362014	0.848	0.676	1.15668e-191	Lum-A
Cnbp	7.10064e-196	-0.655119	0.962	0.923	2.20496e-191	Lum-A
Atox1	8.90158e-196	-0.584057	0.944	0.864	2.76421e-191	Lum-A
Ube2d2a	8.98793e-196	-0.469142	0.864	0.721	2.79102e-191	Lum-A
Eif3c	1.09462e-195	-0.561491	0.953	0.891	3.39914e-191	Lum-A
Ier3	1.90947e-195	-1.85618	0.584	0.82	5.92949e-191	Lum-A
Cct4	4.08226e-195	-0.522413	0.857	0.773	1.26766e-190	Lum-A
Ppp3ca	5.06016e-195	-0.662192	0.675	0.7	1.57133e-190	Lum-A
Ctnnb1	5.9332e-195	-0.610976	0.838	0.783	1.84244e-190	Lum-A
Dek	7.54993e-195	-0.718533	0.717	0.765	2.34448e-190	Lum-A
2007-09-01	8.32238e-195	-0.540658	0.871	0.796	2.58435e-190	Lum-A
Rbbp6	9.65336e-195	-0.730774	0.795	0.773	2.99766e-190	Lum-A
Ptov1	1.62773e-194	-0.41275	0.835	0.688	5.0546e-190	Lum-A
Pon2	1.80398e-194	-0.442858	0.679	0.568	5.60191e-190	Lum-A
Matr3	4.56666e-194	-0.497872	0.789	0.693	1.41809e-189	Lum-A
Sh3bgrl3	5.10643e-194	-0.586105	0.653	0.66	1.5857e-189	Lum-A
Prmt1	5.86286e-194	-0.453756	0.791	0.673	1.82059e-189	Lum-A
Top1	7.34e-194	-0.964545	0.944	0.918	2.27929e-189	Lum-A
Rpl29	8.80265e-194	-0.441822	0.868	0.746	2.73349e-189	Lum-A
Polr2f	1.15881e-193	-0.382991	0.829	0.677	3.59846e-189	Lum-A
Eif4h	1.76097e-193	-0.551127	0.74	0.716	5.46834e-189	Lum-A
Hras	1.92301e-193	-0.659384	0.878	0.766	5.97153e-189	Lum-A
Cbx1	4.04486e-193	-0.429054	0.755	0.656	1.25605e-188	Lum-A
Lsm4	5.6698e-193	-0.39948	0.84	0.696	1.76064e-188	Lum-A
Sfn	1.22987e-192	-2.23872	0.314	0.75	3.8191e-188	Lum-A
Trappc6b	3.84351e-192	-0.291334	0.795	0.573	1.19353e-187	Lum-A
Mrpl23	4.56398e-192	-0.500091	0.731	0.671	1.41725e-187	Lum-A
Mapre1	5.27309e-192	-0.666669	0.737	0.721	1.63745e-187	Lum-A
Vapa	6.39203e-192	-0.489768	0.94	0.825	1.98492e-187	Lum-A
Rbm8a	6.54627e-192	-0.360717	0.875	0.697	2.03281e-187	Lum-A
Ube2s	6.7322e-192	-0.810053	0.918	0.876	2.09055e-187	Lum-A
Ran	1.22952e-191	-0.594117	0.933	0.845	3.81803e-187	Lum-A
Etfb	1.24451e-191	-0.446074	0.956	0.831	3.86457e-187	Lum-A
Krt14	1.27405e-191	-2.60912	0.192	0.568	3.95632e-187	Lum-A
Fxyd3	1.59379e-191	-1.0707	0.953	0.926	4.94918e-187	Lum-A
Ssu72	2.42093e-191	-0.320149	0.891	0.672	7.5177e-187	Lum-A
1810058I24Rik	2.92119e-191	-0.578761	0.71	0.689	9.07117e-187	Lum-A
Ddx50	3.71018e-191	-0.613852	0.826	0.777	1.15212e-186	Lum-A
Ahnak	3.74141e-191	-1.15399	0.501	0.748	1.16182e-186	Lum-A
Snrpd1	9.63788e-191	-0.503587	0.791	0.71	2.99285e-186	Lum-A
Magoh	1.3268e-190	-0.606188	0.779	0.734	4.12013e-186	Lum-A
Gnb1	1.34012e-190	-0.488261	0.762	0.704	4.16146e-186	Lum-A
Rbbp7	1.50992e-190	-0.503275	0.9	0.782	4.68876e-186	Lum-A
Sf3b6	2.56878e-190	-0.426087	0.868	0.745	7.97682e-186	Lum-A
Pkn2	3.20457e-190	-0.604505	0.788	0.765	9.95114e-186	Lum-A
Capzb	3.62308e-190	-0.417268	0.857	0.708	1.12508e-185	Lum-A
Fkbp4	6.0911e-190	-0.476892	0.884	0.757	1.89147e-185	Lum-A
Strap	1.30704e-189	-0.429388	0.746	0.634	4.05874e-185	Lum-A
Tuba1c	1.48602e-189	-1.02877	0.735	0.788	4.61453e-185	Lum-A
Rpl22l1	1.49415e-189	-0.692791	0.962	0.957	4.6398e-185	Lum-A
Gstm1	2.21374e-189	-0.658294	0.797	0.732	6.87433e-185	Lum-A
Polr2j	2.38711e-189	-0.272286	0.869	0.633	7.41271e-185	Lum-A
Hadha	3.4588e-189	-0.4259	0.777	0.648	1.07406e-184	Lum-A
Tcp1	4.69803e-189	-0.382201	0.891	0.727	1.45888e-184	Lum-A
Psme2	5.24398e-189	-0.396415	0.775	0.638	1.62841e-184	Lum-A
Sgpp1	1.0967e-188	0.42897	0.869	0.225	3.40558e-184	Lum-A
Mt2	2.02751e-188	-1.39349	0.808	0.862	6.29602e-184	Lum-A
Rps28	2.13275e-188	-0.927539	1	0.994	6.62282e-184	Lum-A
Tmsb10	2.23068e-187	-1.31475	0.581	0.795	6.92693e-183	Lum-A
Atp1a1	2.29981e-187	-1.02846	0.906	0.867	7.14159e-183	Lum-A
Pla2g12a	2.35701e-187	0.303525	0.931	0.316	7.31921e-183	Lum-A
Sumo2	3.91291e-187	-0.580208	0.971	0.916	1.21508e-182	Lum-A
Copz2	5.37586e-187	0.63261	0.978	0.46	1.66937e-182	Lum-A
Krt5	5.50531e-187	-1.81139	0.06	0.568	1.70956e-182	Lum-A
Trir	9.97307e-187	-0.340139	0.906	0.718	3.09694e-182	Lum-A
Fkbp1a	3.10602e-186	-0.477446	0.691	0.642	9.64513e-182	Lum-A
Perp	3.26232e-186	-0.850835	0.853	0.767	1.01305e-181	Lum-A
Esd	3.95454e-186	-0.411722	0.889	0.761	1.228e-181	Lum-A
Fubp1	4.10714e-186	-0.637157	0.701	0.722	1.27539e-181	Lum-A
Hcfc1r1	5.12166e-186	-0.420833	0.887	0.738	1.59043e-181	Lum-A
Atp6v0e	6.53514e-186	-0.419477	0.935	0.81	2.02936e-181	Lum-A
Mlph	7.39947e-186	0.532515	0.904	0.265	2.29776e-181	Lum-A
Sdf2	1.03448e-185	-0.256491	0.797	0.536	3.21237e-181	Lum-A
Brd1	1.9178e-185	-0.551287	0.753	0.702	5.95534e-181	Lum-A
Rac1	1.93938e-185	-0.448516	0.904	0.735	6.02237e-181	Lum-A
Fkbp3	2.07163e-185	-0.481482	0.74	0.669	6.43302e-181	Lum-A
Tox3	4.63129e-185	0.342142	0.871	0.247	1.43816e-180	Lum-A
Arhgdia	5.10639e-185	-0.415188	0.753	0.643	1.58569e-180	Lum-A
Chic2	5.62276e-185	-0.473111	0.782	0.646	1.74604e-180	Lum-A
Pcmt1	6.30906e-185	-0.262564	0.806	0.56	1.95915e-180	Lum-A
Luzp1	6.36544e-185	-0.735012	0.77	0.733	1.97666e-180	Lum-A
Cct5	8.88673e-185	-0.451482	0.949	0.834	2.7596e-180	Lum-A
Ssb	1.0631e-184	-0.501067	0.944	0.857	3.30125e-180	Lum-A
Cggbp1	1.227e-184	-0.509822	0.86	0.746	3.8102e-180	Lum-A
Scaf11	1.89876e-184	-0.524137	0.795	0.719	5.89622e-180	Lum-A
Mme	1.97165e-184	0.574326	0.982	0.377	6.12257e-180	Lum-A
Sumo1	1.98698e-184	-0.482432	0.911	0.808	6.17016e-180	Lum-A
Anp32a	2.74995e-184	-0.400199	0.862	0.714	8.53943e-180	Lum-A
Dst	6.7647e-184	-1.5468	0.597	0.781	2.10064e-179	Lum-A
Adh5	9.91794e-184	-0.363898	0.844	0.668	3.07982e-179	Lum-A
Hmgb2	1.20496e-183	-0.93495	0.664	0.767	3.74175e-179	Lum-A
Glrx3	1.32497e-183	-0.370692	0.898	0.745	4.11442e-179	Lum-A
Siva1	1.59233e-183	-0.631305	0.633	0.673	4.94465e-179	Lum-A
Coq10b	2.06837e-183	-0.773759	0.566	0.672	6.42292e-179	Lum-A
Dgcr6	2.33258e-183	-0.309335	0.789	0.573	7.24336e-179	Lum-A
Spop	3.18108e-183	-0.439849	0.88	0.736	9.8782e-179	Lum-A
Ly6e	3.54938e-183	-1.16266	0.74	0.827	1.10219e-178	Lum-A
Hspe1	3.91318e-183	-0.607283	0.971	0.914	1.21516e-178	Lum-A
Gpx3	5.05305e-183	0.265427	0.679	0.115	1.56912e-178	Lum-A
Rab10	8.50901e-183	-0.376891	0.869	0.693	2.6423e-178	Lum-A
Son	4.85746e-182	-0.706845	0.942	0.951	1.50839e-177	Lum-A
Ppp1ca	5.96224e-182	-0.44931	0.935	0.82	1.85145e-177	Lum-A
Cd24a	7.64641e-182	-0.850901	0.849	0.59	2.37444e-177	Lum-A
Atp5a1	1.23667e-181	-0.571451	0.973	0.933	3.84024e-177	Lum-A
Txnl4a	1.34978e-181	-0.327914	0.8	0.606	4.19148e-177	Lum-A
Bclaf1	2.08357e-181	-0.478352	0.815	0.693	6.47012e-177	Lum-A
Npm3	2.57744e-181	-0.372732	0.721	0.596	8.00371e-177	Lum-A
Srrm1	2.63841e-181	-0.558561	0.911	0.856	8.19305e-177	Lum-A
Txndc17	3.38162e-181	-0.513754	0.942	0.847	1.0501e-176	Lum-A
Brk1	3.4381e-181	-0.358193	0.913	0.748	1.06763e-176	Lum-A
Hdgf	5.52208e-181	-0.426565	0.806	0.68	1.71477e-176	Lum-A
Timp3	5.61206e-181	-1.24978	0.102	0.671	1.74271e-176	Lum-A
Rsl1d1	5.97344e-181	-0.447479	0.819	0.679	1.85493e-176	Lum-A
Fmo2	9.32056e-181	-1.37391	0.247	0.679	2.89431e-176	Lum-A
Arpc3	1.22806e-180	-0.53086	0.949	0.874	3.81349e-176	Lum-A
Gng12	1.60096e-180	-0.584616	0.797	0.733	4.97146e-176	Lum-A
Hspa4	2.26751e-180	-0.496003	0.837	0.706	7.04128e-176	Lum-A
Cdc37	2.60999e-180	-0.375328	0.906	0.743	8.10479e-176	Lum-A
Ythdc1	4.69998e-180	-0.628755	0.71	0.716	1.45949e-175	Lum-A
Srsf11	5.21468e-180	-0.495819	0.898	0.796	1.61932e-175	Lum-A
Glmp	6.71803e-180	-0.268928	0.829	0.581	2.08615e-175	Lum-A
Pdcl3	1.21985e-179	-0.522335	0.635	0.633	3.788e-175	Lum-A
Nol7	1.40121e-179	-0.447676	0.936	0.823	4.35118e-175	Lum-A
Spag9	1.82663e-179	-0.836801	0.8	0.815	5.67224e-175	Lum-A
Eif1a	2.47965e-179	-0.676544	0.846	0.781	7.70005e-175	Lum-A
Snrpg	4.20473e-179	-0.598396	0.737	0.731	1.3057e-174	Lum-A
Actr3	4.80092e-179	-0.576005	0.786	0.706	1.49083e-174	Lum-A
Ccdc12	4.90935e-179	-0.371396	0.849	0.673	1.5245e-174	Lum-A
Ppp4r2	9.79517e-179	-0.492578	0.766	0.656	3.04169e-174	Lum-A
Rnf187	1.01264e-178	-0.427013	0.793	0.646	3.14454e-174	Lum-A
Tpr	1.01837e-178	-0.505883	0.891	0.803	3.16234e-174	Lum-A
Drap1	1.02162e-178	-0.464992	0.887	0.79	3.17244e-174	Lum-A
Pfdn2	1.17023e-178	-0.327798	0.924	0.742	3.63391e-174	Lum-A
Myh9	1.33543e-178	-0.796736	0.695	0.763	4.14691e-174	Lum-A
Rp9	1.53097e-178	-0.382819	0.844	0.664	4.75413e-174	Lum-A
Rbm25	1.57482e-178	-0.570448	0.873	0.811	4.89029e-174	Lum-A
Ar	1.99016e-178	-0.612778	0.838	0.783	6.18005e-174	Lum-A
Tac1	2.42649e-178	0.500301	0.579	0.057	7.53497e-174	Lum-A
Wac	3.67212e-178	-0.405439	0.744	0.616	1.1403e-173	Lum-A
Ppp1r14b	4.22311e-178	-0.537715	0.947	0.862	1.3114e-173	Lum-A
Sertad1	4.77459e-178	-0.873892	0.603	0.733	1.48265e-173	Lum-A
Usp34	4.9474e-178	-0.589429	0.759	0.742	1.53632e-173	Lum-A
Eprs	6.69725e-178	-0.348083	0.887	0.684	2.0797e-173	Lum-A
Ubap2l	9.43136e-178	-0.489692	0.775	0.696	2.92872e-173	Lum-A
Ndufa10	9.95849e-178	-0.294621	0.84	0.64	3.09241e-173	Lum-A
Dnajb6	1.50063e-177	-0.459814	0.911	0.783	4.65991e-173	Lum-A
Abhd12	2.09869e-177	-0.595816	0.764	0.665	6.51707e-173	Lum-A
Khdrbs1	3.63224e-177	-0.585214	0.659	0.67	1.12792e-172	Lum-A
Strn3	4.63149e-177	-0.556836	0.715	0.688	1.43822e-172	Lum-A
Ddx6	4.72729e-177	-0.422701	0.8	0.671	1.46797e-172	Lum-A
1600014C10Rik	6.08765e-177	-1.74177	0.143	0.589	1.8904e-172	Lum-A
Mrpl52	6.92249e-177	-0.580005	0.951	0.901	2.14964e-172	Lum-A
Eif3l	1.3243e-176	-0.288792	0.766	0.574	4.11234e-172	Lum-A
Mrps33	1.66696e-176	-0.358389	0.835	0.692	5.17641e-172	Lum-A
Atxn10	1.83601e-176	-0.345816	0.726	0.582	5.70136e-172	Lum-A
Dusp11	2.17576e-176	-0.40209	0.802	0.657	6.75639e-172	Lum-A
Egr1	2.23871e-176	-1.41272	0.719	0.888	6.95185e-172	Lum-A
Chd4	3.00018e-176	-0.57647	0.826	0.764	9.31647e-172	Lum-A
Wdr83os	3.36217e-176	-0.257474	0.735	0.527	1.04406e-171	Lum-A
Map2k2	3.69981e-176	-0.294765	0.886	0.668	1.1489e-171	Lum-A
Llph	4.58756e-176	-0.460682	0.915	0.774	1.42457e-171	Lum-A
C1qbp	4.67309e-176	-0.381268	0.819	0.67	1.45113e-171	Lum-A
Tagln2	5.00593e-176	-0.860273	0.757	0.746	1.55449e-171	Lum-A
Immt	5.69138e-176	-0.299769	0.735	0.552	1.76734e-171	Lum-A
Crip2	6.09713e-176	-0.541103	0.878	0.716	1.89334e-171	Lum-A
Tkt	1.25471e-175	-0.483267	0.842	0.718	3.89625e-171	Lum-A
Mrpl14	1.34826e-175	-0.254243	0.911	0.651	4.18676e-171	Lum-A
Rab7	1.67244e-175	-0.311276	0.858	0.656	5.19344e-171	Lum-A
Dph3	1.83277e-175	-0.260338	0.857	0.615	5.6913e-171	Lum-A
Ndufs8	2.10513e-175	-0.295649	0.811	0.613	6.53705e-171	Lum-A
Nedd8	2.49791e-175	-0.445913	0.964	0.877	7.75677e-171	Lum-A
Tubb4b	2.83573e-175	-0.701621	0.94	0.906	8.80578e-171	Lum-A
Ctdspl	3.49622e-175	-0.463738	0.762	0.622	1.08568e-170	Lum-A
Ppp1r11	3.6747e-175	-0.295985	0.848	0.63	1.1411e-170	Lum-A
Dctn2	3.68949e-175	-0.365274	0.877	0.721	1.1457e-170	Lum-A
Nxn	4.95286e-175	-0.697347	0.675	0.599	1.53801e-170	Lum-A
Anxa7	5.57256e-175	-0.296221	0.817	0.592	1.73045e-170	Lum-A
Smc1a	6.21133e-175	-0.597562	0.666	0.686	1.9288e-170	Lum-A
Eloc	6.68905e-175	-0.544691	0.868	0.764	2.07715e-170	Lum-A
Mbd3	7.68236e-175	-0.265883	0.846	0.611	2.3856e-170	Lum-A
Emg1	8.9672e-175	-0.265224	0.766	0.544	2.78458e-170	Lum-A
Mtdh	1.11647e-174	-0.476289	0.913	0.819	3.46698e-170	Lum-A
Vdac1	1.16095e-174	-0.379205	0.918	0.758	3.60511e-170	Lum-A
Slc38a2	1.55574e-174	-0.976437	0.88	0.845	4.83105e-170	Lum-A
Bnip3l	2.30906e-174	-0.374906	0.858	0.696	7.17034e-170	Lum-A
Rheb	2.33906e-174	-0.569673	0.922	0.81	7.26348e-170	Lum-A
Rap1b	2.50279e-174	-0.622561	0.619	0.684	7.77193e-170	Lum-A
Nucks1	2.78117e-174	-0.453965	0.936	0.815	8.63636e-170	Lum-A
Acbd6	3.51886e-174	-0.335135	0.813	0.64	1.09271e-169	Lum-A
Itga6	3.78532e-174	-0.911708	0.319	0.683	1.17546e-169	Lum-A
Polr2m	4.46067e-174	-0.385342	0.777	0.625	1.38517e-169	Lum-A
Nap1l1	5.13316e-174	-0.480082	0.84	0.705	1.594e-169	Lum-A
Cited1	6.87965e-174	0.263291	0.441	0.018	2.13634e-169	Lum-A
Srsf3	8.3175e-174	-0.602443	0.938	0.874	2.58283e-169	Lum-A
Snrpd3	2.37075e-173	-0.416485	0.857	0.722	7.3619e-169	Lum-A
Tra2b	2.82203e-173	-0.686004	0.844	0.842	8.76325e-169	Lum-A
Sugt1	3.10408e-173	-0.262956	0.773	0.538	9.6391e-169	Lum-A
Spink5	3.15425e-173	3.58407	0.57	0.094	9.79491e-169	Lum-A
Syf2	3.57371e-173	-0.31867	0.871	0.666	1.10974e-168	Lum-A
Pdha1	3.60523e-173	-0.315778	0.717	0.549	1.11953e-168	Lum-A
Plekhj1	3.77881e-173	-0.287328	0.777	0.57	1.17344e-168	Lum-A
Rbbp4	5.65188e-173	-0.379661	0.786	0.634	1.75508e-168	Lum-A
Sptbn1	7.61249e-173	-0.468269	0.777	0.659	2.36391e-168	Lum-A
Malat1	1.35811e-172	-1.0381	0.973	0.984	4.21734e-168	Lum-A
Mrps16	1.75869e-172	-0.300459	0.817	0.639	5.46126e-168	Lum-A
Eif4b	2.02947e-172	-0.392587	0.862	0.7	6.3021e-168	Lum-A
Wasl	2.80206e-172	-0.433703	0.666	0.582	8.70123e-168	Lum-A
Dnajc7	2.8425e-172	-0.26927	0.806	0.567	8.82681e-168	Lum-A
Arhgap5	4.23161e-172	-0.489457	0.797	0.702	1.31404e-167	Lum-A
Sdcbp	4.25594e-172	-0.398683	0.887	0.715	1.3216e-167	Lum-A
Csrp1	4.45124e-172	-1.06924	0.499	0.717	1.38224e-167	Lum-A
Rtf1	6.16283e-172	-0.424766	0.771	0.633	1.91374e-167	Lum-A
Cldn4	7.69686e-172	-1.12507	0.851	0.882	2.39011e-167	Lum-A
Wnk1	9.25303e-172	-0.568357	0.719	0.715	2.87334e-167	Lum-A
Wasf2	1.17887e-171	-0.420661	0.664	0.589	3.66076e-167	Lum-A
Txn1	1.34902e-171	-0.598115	0.976	0.939	4.1891e-167	Lum-A
1810022K09Rik	1.38508e-171	-0.363436	0.858	0.675	4.3011e-167	Lum-A
Ranbp1	2.01285e-171	-0.447534	0.829	0.701	6.25051e-167	Lum-A
Itm2b	2.34241e-171	-0.715784	0.996	0.994	7.27388e-167	Lum-A
Nipbl	2.49238e-171	-0.506077	0.706	0.666	7.7396e-167	Lum-A
Ghitm	3.24863e-171	-0.34225	0.82	0.65	1.0088e-166	Lum-A
Psma6	3.51383e-171	-0.28758	0.889	0.675	1.09115e-166	Lum-A
H2afy	4.85689e-171	-0.364056	0.788	0.655	1.50821e-166	Lum-A
Galnt18	5.39784e-171	-0.270368	0.762	0.472	1.67619e-166	Lum-A
Elf1	1.30319e-170	-0.474788	0.777	0.68	4.0468e-166	Lum-A
Ptbp3	1.36338e-170	-0.518094	0.613	0.608	4.23371e-166	Lum-A
Ppig	1.47633e-170	-0.517744	0.819	0.743	4.58446e-166	Lum-A
Laptm4a	1.93082e-170	-0.551523	0.987	0.936	5.99578e-166	Lum-A
Mpc2	2.13202e-170	-0.451583	0.944	0.828	6.62056e-166	Lum-A
Pak1ip1	2.14318e-170	-0.309457	0.724	0.556	6.65521e-166	Lum-A
Eif3g	2.159e-170	-0.303304	0.949	0.739	6.70436e-166	Lum-A
Bptf	2.16468e-170	-0.509174	0.748	0.676	6.72197e-166	Lum-A
Ube2q2	2.51088e-170	-0.309911	0.748	0.555	7.79704e-166	Lum-A
Agr2	3.19725e-170	0.494378	0.98	0.406	9.92841e-166	Lum-A
Bst2	3.39881e-170	0.280485	0.833	0.242	1.05543e-165	Lum-A
Ube2e1	3.63722e-170	-0.374374	0.706	0.587	1.12947e-165	Lum-A
Ifitm2	4.11908e-170	-0.754273	0.94	0.858	1.2791e-165	Lum-A
Arid4b	4.52503e-170	-0.527123	0.76	0.706	1.40516e-165	Lum-A
Aamp	8.14095e-170	-0.319467	0.915	0.73	2.52801e-165	Lum-A
Rdx	9.22255e-170	-0.504658	0.82	0.729	2.86388e-165	Lum-A
Arg2	1.17117e-169	0.291031	0.886	0.286	3.63682e-165	Lum-A
Ube3a	1.33875e-169	-0.338437	0.829	0.652	4.15723e-165	Lum-A
Trappc6a	1.38823e-169	-0.317592	0.909	0.726	4.31087e-165	Lum-A
Gstm2	1.54095e-169	-0.298111	0.811	0.588	4.78512e-165	Lum-A
Rad23b	1.7988e-169	-0.276862	0.828	0.594	5.58582e-165	Lum-A
Commd1	3.46256e-169	-0.277172	0.717	0.54	1.07523e-164	Lum-A
Dnajc21	3.59336e-169	-0.351082	0.733	0.559	1.11585e-164	Lum-A
Ddx21	3.97174e-169	-0.727233	0.662	0.703	1.23334e-164	Lum-A
Nars	4.28829e-169	-0.327732	0.884	0.651	1.33164e-164	Lum-A
Ceacam1	4.92548e-169	-0.287934	0.927	0.527	1.52951e-164	Lum-A
Pitpnb	9.59343e-169	-0.277082	0.815	0.58	2.97905e-164	Lum-A
Fmc1	1.05279e-168	-0.311496	0.735	0.555	3.26922e-164	Lum-A
Bcl7c	1.05904e-168	-0.590399	0.623	0.648	3.28863e-164	Lum-A
Impdh2	1.07445e-168	-0.509348	0.65	0.636	3.3365e-164	Lum-A
Luc7l2	1.37985e-168	-0.559114	0.862	0.799	4.28484e-164	Lum-A
Snx3	1.51934e-168	-0.303007	0.846	0.648	4.71801e-164	Lum-A
Aimp1	2.78288e-168	-0.356473	0.92	0.756	8.64169e-164	Lum-A
Tsen34	2.86326e-168	-0.366406	0.762	0.612	8.8913e-164	Lum-A
Klf6	3.27463e-168	-1.14022	0.864	0.889	1.01687e-163	Lum-A
Atp1b3	3.34585e-168	-0.86603	0.574	0.672	1.03899e-163	Lum-A
Clic1	3.39241e-168	-0.633528	0.947	0.861	1.05345e-163	Lum-A
Nfe2l2	3.70872e-168	-0.713031	0.595	0.645	1.15167e-163	Lum-A
Cfdp1	4.42416e-168	-0.342199	0.793	0.641	1.37383e-163	Lum-A
Yy1	6.17839e-168	-0.461928	0.891	0.791	1.91858e-163	Lum-A
Hnrnpm	1.34517e-167	-0.453601	0.766	0.668	4.17715e-163	Lum-A
Clstn1	1.37624e-167	-0.58483	0.691	0.67	4.27365e-163	Lum-A
Rtn3	1.39785e-167	-0.268505	0.82	0.593	4.34074e-163	Lum-A
Acrbp	1.71302e-167	0.328093	0.722	0.16	5.31945e-163	Lum-A
Zfhx3	1.98607e-167	-0.408297	0.746	0.585	6.16733e-163	Lum-A
Ap2s1	2.22375e-167	-0.274408	0.811	0.597	6.90542e-163	Lum-A
Srsf6	3.26926e-167	-0.374584	0.817	0.651	1.0152e-162	Lum-A
Cltb	4.9801e-167	-0.358173	0.849	0.674	1.54647e-162	Lum-A
Raly	5.40345e-167	-0.453791	0.82	0.697	1.67793e-162	Lum-A
Pfdn1	1.00559e-166	-0.317809	0.848	0.651	3.12265e-162	Lum-A
Rab11a	1.0399e-166	-0.333771	0.848	0.608	3.22921e-162	Lum-A
N4bp2l2	1.33966e-166	-0.401147	0.782	0.651	4.16003e-162	Lum-A
Mprip	1.59768e-166	-0.549182	0.673	0.655	4.96128e-162	Lum-A
Rnf149	1.64212e-166	-0.458676	0.855	0.579	5.09926e-162	Lum-A
Sqstm1	1.83632e-166	-0.471055	0.829	0.672	5.70234e-162	Lum-A
Hpgd	2.25515e-166	-1.04236	0.301	0.669	7.00292e-162	Lum-A
Ech1	2.447e-166	-0.494456	0.886	0.766	7.59865e-162	Lum-A
Ptpn1	2.95611e-166	-0.766332	0.673	0.707	9.1796e-162	Lum-A
Aig1	4.18419e-166	-0.32553	0.828	0.635	1.29932e-161	Lum-A
Zfp91	4.5561e-166	-0.351718	0.877	0.698	1.4148e-161	Lum-A
Yrdc	5.32257e-166	-0.343762	0.748	0.572	1.65282e-161	Lum-A
Pdcd6	6.24999e-166	-0.308255	0.815	0.637	1.94081e-161	Lum-A
Gspt1	7.61586e-166	-0.41798	0.882	0.739	2.36495e-161	Lum-A
Ppm1a	7.74891e-166	-0.390749	0.688	0.588	2.40627e-161	Lum-A
Hnrnpd	9.54301e-166	-0.533292	0.755	0.684	2.96339e-161	Lum-A
Smim11	9.94164e-166	-0.337887	0.67	0.554	3.08718e-161	Lum-A
Ddx39b	1.13007e-165	-0.478747	0.766	0.693	3.50919e-161	Lum-A
Syncrip	1.46799e-165	-0.488693	0.719	0.651	4.55854e-161	Lum-A
Acadl	1.73179e-165	-0.330096	0.895	0.685	5.37772e-161	Lum-A
Lmo4	2.5831e-165	-0.82482	0.735	0.767	8.02129e-161	Lum-A
Rala	2.63792e-165	-0.27787	0.838	0.633	8.19153e-161	Lum-A
Arfgef1	3.14099e-165	-0.398665	0.764	0.632	9.75372e-161	Lum-A
Psmc6	3.42459e-165	-0.318526	0.895	0.711	1.06344e-160	Lum-A
Ppp1cc	3.71284e-165	-0.298297	0.804	0.597	1.15295e-160	Lum-A
Tomm20	4.18324e-165	-0.542761	0.96	0.9	1.29902e-160	Lum-A
Eif3d	6.52888e-165	-0.25633	0.84	0.618	2.02741e-160	Lum-A
Phf5a	7.23304e-165	-0.254252	0.799	0.576	2.24607e-160	Lum-A
Txndc9	9.3804e-165	-0.300127	0.735	0.559	2.9129e-160	Lum-A
Ucp2	1.02767e-164	-0.526997	0.681	0.635	3.19123e-160	Lum-A
Cp	1.08557e-164	-1.45582	0.033	0.55	3.37101e-160	Lum-A
Dnajc8	1.10061e-164	-0.403855	0.713	0.614	3.41773e-160	Lum-A
Rbm42	1.19309e-164	-0.310808	0.766	0.599	3.70492e-160	Lum-A
Srsf10	1.25494e-164	-0.393168	0.842	0.691	3.89695e-160	Lum-A
Snw1	1.37381e-164	-0.319635	0.779	0.608	4.26609e-160	Lum-A
1110004F10Rik	1.66171e-164	-0.394264	0.813	0.676	5.16012e-160	Lum-A
Pcm1	1.92607e-164	-0.465427	0.657	0.606	5.98101e-160	Lum-A
Ets2	1.93696e-164	-0.915198	0.405	0.675	6.01485e-160	Lum-A
Ube2e3	2.04074e-164	-0.376422	0.77	0.629	6.33712e-160	Lum-A
Kmt2e	2.30079e-164	-0.500899	0.731	0.646	7.14463e-160	Lum-A
Junb	2.62823e-164	-1.26001	0.911	0.94	8.16143e-160	Lum-A
Eif3b	2.66831e-164	-0.253551	0.782	0.554	8.28589e-160	Lum-A
Ccdc47	3.21219e-164	-0.286933	0.797	0.596	9.97482e-160	Lum-A
Cetn3	3.33896e-164	-0.430092	0.673	0.621	1.03685e-159	Lum-A
Eif4g1	3.73111e-164	-0.293374	0.88	0.648	1.15862e-159	Lum-A
Gm11361	4.00512e-164	-0.377341	0.786	0.607	1.24371e-159	Lum-A
Acin1	7.20529e-164	-0.433866	0.753	0.656	2.23746e-159	Lum-A
Cbx3	8.24704e-164	-0.331866	0.838	0.65	2.56095e-159	Lum-A
Cirbp	8.64998e-164	-0.50279	0.757	0.667	2.68608e-159	Lum-A
Tpm4	9.01568e-164	-0.857008	0.394	0.653	2.79964e-159	Lum-A
Arglu1	9.54895e-164	-0.605443	0.864	0.785	2.96523e-159	Lum-A
Cd2ap	1.19995e-163	-0.569888	0.907	0.792	3.72621e-159	Lum-A
Snrnp70	1.7456e-163	-0.485679	0.886	0.779	5.4206e-159	Lum-A
Aff4	1.92212e-163	-0.576996	0.748	0.701	5.96877e-159	Lum-A
Eif1ax	2.30447e-163	-0.339859	0.842	0.662	7.15607e-159	Lum-A
Marcks	2.5241e-163	-0.86568	0.051	0.6	7.83808e-159	Lum-A
Pnn	2.86029e-163	-0.522269	0.762	0.683	8.88205e-159	Lum-A
Xrn2	3.37526e-163	-0.485637	0.686	0.63	1.04812e-158	Lum-A
Psmd8	3.47025e-163	-0.326905	0.927	0.738	1.07762e-158	Lum-A
Hsd17b10	3.59711e-163	-0.304612	0.92	0.726	1.11701e-158	Lum-A
Fam114a2	5.99307e-163	-0.254279	0.789	0.549	1.86103e-158	Lum-A
Ubn1	7.47008e-163	-0.420769	0.706	0.62	2.31969e-158	Lum-A
Prpf38b	8.35658e-163	-0.455312	0.719	0.639	2.59497e-158	Lum-A
Arl6ip1	9.72045e-163	-0.437305	0.864	0.745	3.01849e-158	Lum-A
Larp1b	1.08313e-162	-0.288145	0.833	0.596	3.36343e-158	Lum-A
Skp1a	1.24109e-162	-0.431057	0.933	0.8	3.85395e-158	Lum-A
Bud31	1.33395e-162	-0.352968	0.748	0.585	4.1423e-158	Lum-A
Cul3	1.52155e-162	-0.438756	0.751	0.656	4.72486e-158	Lum-A
Luc7l3	1.80293e-162	-0.517287	0.795	0.7	5.59862e-158	Lum-A
Kpna4	1.81191e-162	-0.492599	0.63	0.599	5.62654e-158	Lum-A
Pigr	1.85582e-162	1.02527	0.722	0.146	5.76288e-158	Lum-A
Egln2	2.03425e-162	-0.426471	0.739	0.601	6.31694e-158	Lum-A
Pbrm1	3.21359e-162	-0.392735	0.733	0.621	9.97917e-158	Lum-A
Sult5a1	3.64597e-162	-1.3135	0.083	0.565	1.13218e-157	Lum-A
Slc12a2	4.3665e-162	0.359173	0.989	0.441	1.35593e-157	Lum-A
Uqcrc1	5.63688e-162	-0.315826	0.86	0.666	1.75042e-157	Lum-A
Ndufa11	5.86252e-162	-0.682127	0.969	0.922	1.82049e-157	Lum-A
Arf5	6.08525e-162	-0.495578	0.966	0.916	1.88965e-157	Lum-A
Snx6	6.48821e-162	-0.307762	0.735	0.56	2.01478e-157	Lum-A
G3bp2	6.77787e-162	-0.339746	0.897	0.725	2.10473e-157	Lum-A
Pfdn6	7.64012e-162	-0.300667	0.699	0.544	2.37249e-157	Lum-A
Pten	8.34998e-162	-0.405925	0.657	0.583	2.59292e-157	Lum-A
Ptprf	1.06788e-161	-0.535885	0.601	0.645	3.31607e-157	Lum-A
Paip2	1.28942e-161	-0.30353	0.911	0.706	4.00402e-157	Lum-A
Puf60	1.429e-161	-0.36128	0.762	0.623	4.43748e-157	Lum-A
Kcmf1	2.20859e-161	-0.384486	0.797	0.662	6.85832e-157	Lum-A
Wsb1	2.25452e-161	-0.931169	0.481	0.696	7.00097e-157	Lum-A
Gpi1	3.08339e-161	-0.361333	0.866	0.714	9.57485e-157	Lum-A
Ctsl	3.34769e-161	-1.02776	0.955	0.803	1.03956e-156	Lum-A
Pdap1	3.72681e-161	-0.416485	0.911	0.767	1.15729e-156	Lum-A
Eif4a2	3.99773e-161	-0.384245	0.922	0.756	1.24142e-156	Lum-A
Lamtor4	4.21264e-161	-0.348042	0.922	0.756	1.30815e-156	Lum-A
Nono	4.57237e-161	-0.386941	0.686	0.598	1.41986e-156	Lum-A
Ssbp3	5.63995e-161	-0.446468	0.668	0.622	1.75137e-156	Lum-A
Psmc3	7.53122e-161	-0.308783	0.938	0.728	2.33867e-156	Lum-A
Ssrp1	8.7024e-161	-0.320954	0.67	0.531	2.70236e-156	Lum-A
Pdlim5	9.66753e-161	-0.568323	0.532	0.592	3.00206e-156	Lum-A
Bsg	1.17223e-160	-0.880066	0.989	0.965	3.64013e-156	Lum-A
Rassf1	1.28169e-160	-0.556773	0.67	0.595	3.98004e-156	Lum-A
Tmed5	1.62427e-160	-0.650747	0.735	0.641	5.04386e-156	Lum-A
Ctsb	1.80193e-160	-0.379803	0.715	0.572	5.59553e-156	Lum-A
Sf3b5	2.76734e-160	-0.286086	0.886	0.691	8.59343e-156	Lum-A
Papola	3.42295e-160	-0.268785	0.824	0.614	1.06293e-155	Lum-A
Cenpb	3.67932e-160	-0.418846	0.76	0.637	1.14254e-155	Lum-A
Rras	4.66385e-160	-0.806392	0.408	0.659	1.44827e-155	Lum-A
Rgs2	7.90041e-160	1.03173	0.773	0.208	2.45331e-155	Lum-A
Grpel1	8.53351e-160	-0.264709	0.898	0.684	2.64991e-155	Lum-A
Nhp2	9.45573e-160	-0.256224	0.875	0.634	2.93629e-155	Lum-A
Anapc16	1.03357e-159	-0.307025	0.715	0.544	3.20954e-155	Lum-A
Adipor1	1.05493e-159	-0.251639	0.833	0.608	3.27587e-155	Lum-A
Eci1	1.09507e-159	-0.282053	0.898	0.67	3.40053e-155	Lum-A
Vps4b	1.1969e-159	-0.272516	0.737	0.521	3.71673e-155	Lum-A
Srsf5	1.23176e-159	-0.617365	0.915	0.808	3.825e-155	Lum-A
Rnase4	1.62046e-159	-0.806049	0.025	0.564	5.03201e-155	Lum-A
Ppdpf	1.66573e-159	-0.265253	0.76	0.54	5.17259e-155	Lum-A
U2surp	1.91732e-159	-0.350784	0.742	0.597	5.95387e-155	Lum-A
Maff	1.95623e-159	-1.24773	0.374	0.677	6.07469e-155	Lum-A
Mtpn	2.17744e-159	-0.281447	0.637	0.481	6.76161e-155	Lum-A
Timm13	2.30751e-159	-0.378182	0.947	0.813	7.16552e-155	Lum-A
Fdx1	2.91934e-159	-0.26886	0.875	0.632	9.06543e-155	Lum-A
Palld	5.51656e-159	-1.03096	0.363	0.591	1.71306e-154	Lum-A
Cacybp	5.8728e-159	-0.35477	0.786	0.643	1.82368e-154	Lum-A
Snrpf	6.98778e-159	-0.403338	0.75	0.638	2.16992e-154	Lum-A
Zfand6	8.90262e-159	-0.32104	0.733	0.562	2.76453e-154	Lum-A
Rida	9.98134e-159	-0.605832	0.525	0.587	3.09951e-154	Lum-A
Bcl10	1.06226e-158	-0.565268	0.637	0.619	3.29864e-154	Lum-A
Tm2d2	1.27295e-158	-0.25142	0.813	0.589	3.95289e-154	Lum-A
Dnttip2	1.3403e-158	-0.357223	0.706	0.566	4.16204e-154	Lum-A
Rbp1	2.31919e-158	-1.18995	0.025	0.547	7.20179e-154	Lum-A
Cox14	3.53368e-158	-0.297483	0.946	0.761	1.09731e-153	Lum-A
Rnf130	4.21545e-158	0.428373	0.944	0.366	1.30902e-153	Lum-A
Huwe1	5.66959e-158	-0.426333	0.684	0.607	1.76058e-153	Lum-A
Cox4i1	6.96843e-158	-0.422018	1	0.989	2.16391e-153	Lum-A
Sap18	7.20243e-158	-0.261574	0.884	0.641	2.23657e-153	Lum-A
Tubb5	8.41323e-158	-0.621989	0.568	0.641	2.61256e-153	Lum-A
Vcp	9.97084e-158	-0.361499	0.913	0.74	3.09624e-153	Lum-A
Nufip2	1.1658e-157	-0.675862	0.684	0.71	3.62017e-153	Lum-A
Hnrnpr	1.76664e-157	-0.428011	0.653	0.596	5.48595e-153	Lum-A
Prelid1	2.44533e-157	-0.28923	0.911	0.704	7.59349e-153	Lum-A
Ift43	2.72208e-157	-0.429868	0.539	0.571	8.45289e-153	Lum-A
Tnks2	4.03184e-157	-0.481217	0.597	0.59	1.25201e-152	Lum-A
Ebna1bp2	6.15544e-157	-0.289234	0.668	0.524	1.91145e-152	Lum-A
Cyc1	8.08529e-157	-0.278968	0.882	0.678	2.51073e-152	Lum-A
Ppp2r2a	1.02479e-156	-0.434184	0.67	0.594	3.18229e-152	Lum-A
Utp3	1.09922e-156	-0.322805	0.74	0.566	3.4134e-152	Lum-A
Csnk2b	1.4323e-156	-0.284897	0.78	0.591	4.44771e-152	Lum-A
Ash1l	1.64711e-156	-0.484861	0.78	0.695	5.11479e-152	Lum-A
Hp1bp3	1.84931e-156	-0.366025	0.737	0.6	5.74267e-152	Lum-A
Rnf10	1.8631e-156	-0.319555	0.857	0.666	5.78549e-152	Lum-A
Ppp1r2	2.02775e-156	-0.398864	0.75	0.598	6.29676e-152	Lum-A
Prpf40a	2.42902e-156	-0.299446	0.829	0.64	7.54282e-152	Lum-A
Fbl	2.61749e-156	-0.401369	0.724	0.608	8.12809e-152	Lum-A
D17Wsu92e	3.13148e-156	-0.303758	0.706	0.524	9.72417e-152	Lum-A
Blnk	3.17796e-156	-0.291712	0.657	0.43	9.86852e-152	Lum-A
Pbx1	3.63681e-156	-0.627186	0.554	0.622	1.12934e-151	Lum-A
Pum1	3.6894e-156	-0.336944	0.688	0.552	1.14567e-151	Lum-A
Pgrmc1	3.81927e-156	-0.437305	0.853	0.728	1.186e-151	Lum-A
Eif5	5.12138e-156	-0.565554	0.953	0.906	1.59034e-151	Lum-A
Eif2s1	5.7549e-156	-0.276365	0.837	0.614	1.78707e-151	Lum-A
Mlf2	7.47773e-156	-0.254401	0.773	0.57	2.32206e-151	Lum-A
Iqgap1	8.32257e-156	-0.510617	0.624	0.622	2.58441e-151	Lum-A
Echs1	8.84594e-156	-0.277126	0.862	0.643	2.74693e-151	Lum-A
Bex3	9.23192e-156	-0.532003	0.906	0.742	2.86679e-151	Lum-A
Foxp1	1.00871e-155	-0.516485	0.808	0.727	3.13235e-151	Lum-A
Rnf6	1.13557e-155	-0.283368	0.764	0.563	3.52628e-151	Lum-A
Chordc1	1.59196e-155	-0.327011	0.686	0.548	4.94351e-151	Lum-A
Gsn	1.60373e-155	-1.24167	0.245	0.691	4.98007e-151	Lum-A
Sod1	1.65528e-155	-0.328256	0.88	0.66	5.14014e-151	Lum-A
Cuedc2	2.32114e-155	-0.299421	0.624	0.51	7.20782e-151	Lum-A
Hnrnpul2	3.13295e-155	-0.295188	0.744	0.542	9.72875e-151	Lum-A
Eif4e	3.44165e-155	-0.394129	0.748	0.588	1.06874e-150	Lum-A
Rtn4	3.70982e-155	-0.710899	0.688	0.719	1.15201e-150	Lum-A
Cux1	3.78992e-155	-0.282949	0.721	0.52	1.17688e-150	Lum-A
Zbtb7a	4.53567e-155	-0.390677	0.762	0.626	1.40846e-150	Lum-A
Nbeal1	9.20504e-155	-0.434507	0.603	0.564	2.85844e-150	Lum-A
Wdr26	1.09045e-154	-0.295872	0.726	0.553	3.38619e-150	Lum-A
Hnrnpdl	1.24904e-154	-0.418637	0.831	0.697	3.87865e-150	Lum-A
Zfp771	1.28136e-154	-0.333824	0.662	0.532	3.979e-150	Lum-A
Tcea1	1.43545e-154	-0.363036	0.822	0.658	4.45749e-150	Lum-A
Zrsr2	1.4665e-154	-0.326888	0.673	0.507	4.55394e-150	Lum-A
Ggnbp2	2.37313e-154	-0.266322	0.768	0.562	7.36929e-150	Lum-A
Cstb	2.89468e-154	-0.597743	0.927	0.835	8.98886e-150	Lum-A
Tbl1x	3.47858e-154	-0.374632	0.601	0.541	1.0802e-149	Lum-A
Prr13	3.55301e-154	-0.274031	0.701	0.503	1.10332e-149	Lum-A
Sbspon	4.83097e-154	-0.988811	0.02	0.547	1.50016e-149	Lum-A
Sec11a	4.94296e-154	-0.299034	0.938	0.745	1.53494e-149	Lum-A
Ncoa4	5.23887e-154	-0.493911	0.779	0.6	1.62683e-149	Lum-A
Ndufs7	5.92093e-154	-0.316139	0.938	0.765	1.83863e-149	Lum-A
Vdac3	7.47659e-154	-0.26017	0.875	0.663	2.32171e-149	Lum-A
Gdi2	8.3685e-154	-0.377868	0.917	0.783	2.59867e-149	Lum-A
Kitl	1.17834e-153	-1.02604	0.187	0.607	3.65909e-149	Lum-A
Trappc4	1.29426e-153	-0.250363	0.838	0.627	4.01906e-149	Lum-A
Bola2	1.83677e-153	-0.254284	0.849	0.61	5.70373e-149	Lum-A
Ppp1r12a	2.15577e-153	-0.533528	0.541	0.595	6.69432e-149	Lum-A
Cd63	2.31626e-153	-0.538625	0.993	0.945	7.19267e-149	Lum-A
Cltc	2.45788e-153	-0.284246	0.889	0.652	7.63245e-149	Lum-A
Psma1	2.98674e-153	-0.302533	0.887	0.701	9.27471e-149	Lum-A
Psmd12	3.13366e-153	-0.273327	0.9	0.698	9.73097e-149	Lum-A
Pnisr	3.6245e-153	-0.453506	0.686	0.6	1.12552e-148	Lum-A
Pdgfa	5.74006e-153	-1.08015	0.439	0.605	1.78246e-148	Lum-A
Pdcd6ip	6.85012e-153	-0.307199	0.744	0.563	2.12717e-148	Lum-A
Anapc5	7.16303e-153	-0.291318	0.726	0.55	2.22434e-148	Lum-A
Cul1	8.48076e-153	-0.375133	0.702	0.604	2.63353e-148	Lum-A
Sars	9.81414e-153	-0.272796	0.869	0.59	3.04758e-148	Lum-A
Ube2h	1.17687e-152	-0.349823	0.731	0.59	3.65454e-148	Lum-A
Ccni	1.30061e-152	-0.346103	0.719	0.574	4.03877e-148	Lum-A
Emp2	1.48334e-152	-0.543784	0.499	0.55	4.60621e-148	Lum-A
Pdcd5	1.78862e-152	-0.351942	0.884	0.727	5.55421e-148	Lum-A
Ndufs2	2.37249e-152	-0.312619	0.844	0.663	7.36728e-148	Lum-A
Naa50	3.47752e-152	-0.312674	0.77	0.573	1.07987e-147	Lum-A
Gm47283	3.61353e-152	-0.670064	0.711	0.715	1.12211e-147	Lum-A
Txnl1	4.00041e-152	-0.385978	0.929	0.808	1.24225e-147	Lum-A
Tiprl	4.70732e-152	-0.254727	0.664	0.487	1.46176e-147	Lum-A
Psap	5.25268e-152	-0.48942	0.906	0.811	1.63111e-147	Lum-A
Tmem123	7.02609e-152	-0.352724	0.644	0.52	2.18181e-147	Lum-A
Erbin	7.84089e-152	-0.361659	0.71	0.584	2.43483e-147	Lum-A
Ppp1cb	8.06479e-152	-0.254203	0.864	0.624	2.50436e-147	Lum-A
Rbx1	8.60473e-152	-0.394609	0.951	0.851	2.67203e-147	Lum-A
Pcnp	1.02238e-151	-0.313496	0.773	0.596	3.1748e-147	Lum-A
S100a1	1.15203e-151	-0.412368	0.768	0.575	3.5774e-147	Lum-A
Rtraf	1.20939e-151	-0.423287	0.967	0.872	3.75552e-147	Lum-A
Serpinb5	1.29059e-151	-0.865955	0.089	0.554	4.00766e-147	Lum-A
Znrd1	1.36987e-151	-0.252104	0.69	0.497	4.25385e-147	Lum-A
Ubxn6	1.67252e-151	-0.322329	0.661	0.533	5.19366e-147	Lum-A
Gm11808	1.68991e-151	-0.309991	0.78	0.585	5.24768e-147	Lum-A
Blvrb	1.71573e-151	-0.437137	0.606	0.595	5.32785e-147	Lum-A
D8Ertd738e	1.93308e-151	-0.330165	0.949	0.793	6.0028e-147	Lum-A
Sltm	3.28549e-151	-0.476799	0.715	0.648	1.02024e-146	Lum-A
Tma7	3.66293e-151	-0.444299	0.966	0.885	1.13745e-146	Lum-A
Fermt2	3.95219e-151	-0.351162	0.804	0.593	1.22727e-146	Lum-A
Plin3	4.11716e-151	-0.274618	0.744	0.559	1.2785e-146	Lum-A
B230219D22Rik	4.93243e-151	-0.408303	0.742	0.628	1.53167e-146	Lum-A
Pura	5.03707e-151	-0.408409	0.904	0.764	1.56416e-146	Lum-A
Gnl3	7.71522e-151	-0.667575	0.684	0.682	2.39581e-146	Lum-A
Elavl1	7.83187e-151	-0.310119	0.652	0.519	2.43203e-146	Lum-A
Wapl	9.24519e-151	-0.358806	0.842	0.697	2.87091e-146	Lum-A
Ccdc59	1.0377e-150	-0.311678	0.775	0.588	3.22237e-146	Lum-A
Myl12b	1.1261e-150	-0.46269	0.94	0.834	3.49688e-146	Lum-A
Taf10	1.16081e-150	-0.345672	0.94	0.791	3.60465e-146	Lum-A
Nr4a1	1.44463e-150	-1.0094	0.606	0.726	4.48601e-146	Lum-A
Zfp36l1	1.96e-150	-0.905876	0.799	0.839	6.08639e-146	Lum-A
Lpp	2.49471e-150	-0.50973	0.612	0.619	7.74682e-146	Lum-A
Gm10260	2.77367e-150	-0.675153	0.973	0.904	8.61307e-146	Lum-A
Dnajc10	2.80614e-150	-0.46588	0.915	0.493	8.7139e-146	Lum-A
Gnai3	2.8107e-150	-0.273741	0.711	0.508	8.72806e-146	Lum-A
Fxr1	2.93093e-150	-0.414737	0.653	0.586	9.10142e-146	Lum-A
Ergic3	3.32263e-150	-0.264847	0.898	0.692	1.03178e-145	Lum-A
Rpl27	3.81013e-150	-0.659846	0.98	0.943	1.18316e-145	Lum-A
BC005537	4.21636e-150	-0.449201	0.668	0.608	1.30931e-145	Lum-A
Idh3b	4.4234e-150	-0.287242	0.635	0.501	1.3736e-145	Lum-A
Eif4ebp1	4.50625e-150	0.585072	0.987	0.56	1.39932e-145	Lum-A
Atp5l	6.06214e-150	-0.53711	0.982	0.965	1.88248e-145	Lum-A
Tomm40	9.47726e-150	-0.277853	0.672	0.512	2.94297e-145	Lum-A
Psme1	1.01628e-149	-0.455484	0.862	0.759	3.15586e-145	Lum-A
Dbi	1.21862e-149	-0.843497	0.918	0.857	3.78418e-145	Lum-A
Eif4a3	1.45814e-149	-0.273225	0.717	0.546	4.52798e-145	Lum-A
Phf3	1.77023e-149	-0.45946	0.675	0.625	5.4971e-145	Lum-A
Smc3	1.90399e-149	-0.291741	0.788	0.596	5.91247e-145	Lum-A
Txn2	2.03208e-149	-0.301926	0.751	0.585	6.31022e-145	Lum-A
Sde2	2.10052e-149	-0.539483	0.672	0.651	6.52274e-145	Lum-A
Hif1a	2.27562e-149	-0.56361	0.555	0.548	7.06648e-145	Lum-A
Chrac1	2.58425e-149	-0.294011	0.699	0.525	8.02488e-145	Lum-A
Hmg20b	3.01035e-149	-0.290876	0.715	0.54	9.34804e-145	Lum-A
Hbegf	3.3193e-149	-1.46912	0.715	0.824	1.03074e-144	Lum-A
Hnrnph1	4.23559e-149	-0.611309	0.632	0.673	1.31528e-144	Lum-A
Erp44	4.5527e-149	-0.28525	0.884	0.608	1.41375e-144	Lum-A
Alad	4.56898e-149	-0.447995	0.574	0.546	1.41881e-144	Lum-A
Ubald2	5.78411e-149	-0.344848	0.642	0.53	1.79614e-144	Lum-A
Spag7	6.10617e-149	-0.258242	0.688	0.51	1.89615e-144	Lum-A
Pcmtd1	7.59072e-149	-0.261637	0.748	0.535	2.35715e-144	Lum-A
Ddx24	9.49123e-149	-0.421359	0.886	0.777	2.94731e-144	Lum-A
Caprin1	1.06454e-148	-0.319987	0.75	0.58	3.3057e-144	Lum-A
Ndfip2	1.17247e-148	-0.345436	0.67	0.55	3.64088e-144	Lum-A
Psma4	1.29936e-148	-0.33321	0.936	0.79	4.0349e-144	Lum-A
Phyh	1.44263e-148	-0.26038	0.831	0.457	4.47979e-144	Lum-A
Rbm3	1.65622e-148	-0.436498	0.971	0.869	5.14306e-144	Lum-A
Ten1	1.66585e-148	-0.266374	0.697	0.51	5.17296e-144	Lum-A
Plec	1.74244e-148	-0.666671	0.39	0.595	5.4108e-144	Lum-A
Rb1cc1	1.83025e-148	-0.357291	0.693	0.546	5.68349e-144	Lum-A
Ppp2ca	2.40041e-148	-0.364239	0.933	0.789	7.45398e-144	Lum-A
Ankrd17	2.57344e-148	-0.338686	0.744	0.571	7.99131e-144	Lum-A
Sdc1	3.56557e-148	-0.927206	0.098	0.573	1.10722e-143	Lum-A
Cox8a	3.74053e-148	-0.497267	0.993	0.98	1.16155e-143	Lum-A
Mycbp2	4.0281e-148	-0.482173	0.824	0.732	1.25084e-143	Lum-A
Arid5b	4.03102e-148	-0.740518	0.648	0.676	1.25175e-143	Lum-A
Denr	4.57316e-148	-0.260653	0.895	0.667	1.4201e-143	Lum-A
Phax	5.14293e-148	-0.251281	0.664	0.484	1.59704e-143	Lum-A
Papss2	5.87305e-148	0.382592	0.893	0.336	1.82376e-143	Lum-A
Pigyl	6.49577e-148	-0.303119	0.599	0.477	2.01713e-143	Lum-A
Pafah1b3	6.51003e-148	-0.257227	0.777	0.577	2.02156e-143	Lum-A
Sarnp	6.89461e-148	-0.319182	0.791	0.606	2.14098e-143	Lum-A
Thrap3	7.97372e-148	-0.40157	0.748	0.64	2.47608e-143	Lum-A
Ppil4	1.08619e-147	-0.314807	0.675	0.515	3.37294e-143	Lum-A
Serinc1	1.48643e-147	-0.295376	0.646	0.498	4.6158e-143	Lum-A
Tprgl	1.55202e-147	-0.398919	0.655	0.579	4.81948e-143	Lum-A
Glud1	1.85914e-147	-0.360429	0.637	0.524	5.77319e-143	Lum-A
Srsf7	2.00653e-147	-0.337736	0.771	0.595	6.23088e-143	Lum-A
Nxf1	2.09798e-147	-0.271098	0.884	0.672	6.51484e-143	Lum-A
Rnf11	2.10558e-147	-0.266726	0.838	0.617	6.53846e-143	Lum-A
Rhoc	2.88575e-147	-0.416036	0.662	0.473	8.96112e-143	Lum-A
Tuba1b	3.09579e-147	-0.743379	0.377	0.661	9.61335e-143	Lum-A
Csnk1g2	6.02351e-147	-0.259707	0.682	0.49	1.87048e-142	Lum-A
Emc3	6.36604e-147	-0.254738	0.684	0.5	1.97685e-142	Lum-A
Dync1i2	6.93486e-147	-0.410545	0.78	0.649	2.15348e-142	Lum-A
Birc6	8.70631e-147	-0.365436	0.793	0.627	2.70357e-142	Lum-A
Rab18	1.06859e-146	-0.345621	0.909	0.713	3.3183e-142	Lum-A
Msi2	1.66948e-146	-0.299684	0.722	0.526	5.18424e-142	Lum-A
Tmco1	2.07759e-146	-0.270968	0.833	0.615	6.45155e-142	Lum-A
Cap1	2.60828e-146	-0.385089	0.626	0.552	8.0995e-142	Lum-A
Zbtb20	2.71341e-146	-0.504004	0.831	0.746	8.42597e-142	Lum-A
Cdk4	4.48805e-146	-0.303928	0.697	0.553	1.39367e-141	Lum-A
Hk2	4.7085e-146	-0.305494	0.795	0.467	1.46213e-141	Lum-A
Jak1	9.20716e-146	-0.433774	0.717	0.632	2.8591e-141	Lum-A
Cyb5b	1.2058e-145	-0.273717	0.655	0.468	3.74437e-141	Lum-A
Gtpbp4	1.40161e-145	-0.551506	0.586	0.617	4.35242e-141	Lum-A
Lmo7	1.43894e-145	-0.667933	0.697	0.451	4.46833e-141	Lum-A
Rsbn1l	1.6595e-145	-0.250574	0.74	0.516	5.15325e-141	Lum-A
Uba52	2.20964e-145	-0.544702	0.944	0.867	6.86161e-141	Lum-A
Man2a1	2.73073e-145	-0.311912	0.717	0.473	8.47974e-141	Lum-A
Dynll2	3.8291e-145	-0.268453	0.857	0.64	1.18905e-140	Lum-A
Pard3	3.92553e-145	-0.542526	0.541	0.6	1.21899e-140	Lum-A
Hnrnpl	4.09239e-145	-0.294186	0.819	0.603	1.27081e-140	Lum-A
Adipor2	4.6641e-145	-0.252566	0.613	0.392	1.44834e-140	Lum-A
Rab6a	4.88665e-145	-0.291956	0.682	0.524	1.51745e-140	Lum-A
Wbp4	4.95586e-145	-0.278518	0.771	0.569	1.53894e-140	Lum-A
Tmem11	6.77017e-145	-0.267615	0.628	0.472	2.10234e-140	Lum-A
Cox7a2	8.03349e-145	-0.474779	0.976	0.943	2.49464e-140	Lum-A
Gar1	1.00266e-144	-0.287126	0.563	0.451	3.11357e-140	Lum-A
Cmas	1.02964e-144	0.492831	0.951	0.41	3.19733e-140	Lum-A
Gpbp1	1.09422e-144	-0.405809	0.67	0.605	3.39787e-140	Lum-A
Golph3	1.17202e-144	-0.288927	0.71	0.541	3.63947e-140	Lum-A
Timp2	1.27284e-144	-0.393773	0.895	0.7	3.95254e-140	Lum-A
Ndufb4	1.41006e-144	-0.375915	0.946	0.82	4.37866e-140	Lum-A
Dstn	1.66564e-144	-0.739992	0.987	0.974	5.17232e-140	Lum-A
Dcun1d5	1.87051e-144	-0.303484	0.735	0.577	5.8085e-140	Lum-A
Pawr	2.09401e-144	-0.373269	0.71	0.537	6.50253e-140	Lum-A
Nsd3	2.55776e-144	-0.313426	0.806	0.614	7.94261e-140	Lum-A
Pcf11	2.68789e-144	-0.645721	0.597	0.653	8.3467e-140	Lum-A
Hopx	2.71185e-144	0.352404	0.973	0.444	8.42111e-140	Lum-A
Cnn3	3.12754e-144	-0.408179	0.657	0.576	9.71194e-140	Lum-A
Glul	3.26313e-144	-0.534257	0.886	0.757	1.0133e-139	Lum-A
Dhx15	3.50753e-144	-0.423561	0.628	0.573	1.08919e-139	Lum-A
Baz2b	4.93705e-144	-0.286283	0.661	0.481	1.5331e-139	Lum-A
Nckap1	6.74941e-144	-0.284885	0.648	0.497	2.0959e-139	Lum-A
Sfr1	7.53241e-144	-0.817249	0.931	0.846	2.33904e-139	Lum-A
Dnajb1	9.60461e-144	-0.969772	0.681	0.747	2.98252e-139	Lum-A
Clic4	1.07795e-143	-0.592724	0.642	0.6	3.34737e-139	Lum-A
Nfia	1.34523e-143	-0.438238	0.574	0.557	4.17733e-139	Lum-A
Cyb5r3	1.78337e-143	-0.441347	0.748	0.632	5.53791e-139	Lum-A
Mbnl2	2.07773e-143	-0.346372	0.835	0.679	6.45197e-139	Lum-A
Canx	2.23895e-143	-0.33371	0.936	0.757	6.95262e-139	Lum-A
Mdh2	2.38091e-143	-0.313181	0.915	0.755	7.39345e-139	Lum-A
Tmem30a	2.45174e-143	-0.254733	0.791	0.577	7.61338e-139	Lum-A
Mpzl2	2.62028e-143	-0.60764	0.456	0.572	8.13674e-139	Lum-A
Mier1	3.08967e-143	-0.457333	0.619	0.586	9.59434e-139	Lum-A
Supt16	3.53873e-143	-0.311249	0.617	0.498	1.09888e-138	Lum-A
Avpi1	3.7057e-143	-0.36759	0.642	0.476	1.15073e-138	Lum-A
Ctcf	4.14043e-143	-0.330921	0.668	0.553	1.28573e-138	Lum-A
Hoxb13	4.45709e-143	0.611076	0.993	0.749	1.38406e-138	Lum-A
Cast	5.02127e-143	-0.390841	0.642	0.529	1.55926e-138	Lum-A
Afdn	6.48116e-143	-0.341544	0.755	0.571	2.01259e-138	Lum-A
Thoc7	1.11251e-142	-0.272957	0.844	0.622	3.45469e-138	Lum-A
Defb1	1.75819e-142	-1.6991	0.191	0.639	5.45971e-138	Lum-A
Ndufa5	1.81578e-142	-0.353924	0.918	0.779	5.63853e-138	Lum-A
Brd4	1.94182e-142	-0.345464	0.606	0.524	6.02993e-138	Lum-A
Gabarapl2	2.31506e-142	-0.308643	0.933	0.767	7.18894e-138	Lum-A
Selenop	2.46722e-142	-0.544487	0.548	0.545	7.66146e-138	Lum-A
Anxa1	2.86986e-142	-0.451728	0.853	0.479	8.91177e-138	Lum-A
Trim2	2.93292e-142	-0.305341	0.877	0.631	9.10761e-138	Lum-A
Zfp644	4.12625e-142	-0.534954	0.492	0.593	1.28132e-137	Lum-A
Akt1	4.51269e-142	-0.253359	0.664	0.484	1.40133e-137	Lum-A
Bcap31	4.54428e-142	-0.361609	0.936	0.803	1.41113e-137	Lum-A
Fam104a	4.89871e-142	-0.300765	0.909	0.731	1.5212e-137	Lum-A
Cd81	4.91373e-142	-0.564026	0.849	0.797	1.52586e-137	Lum-A
Klf5	5.23886e-142	-0.538182	0.726	0.554	1.62682e-137	Lum-A
Esf1	6.60018e-142	-0.361923	0.699	0.58	2.04955e-137	Lum-A
Picalm	9.78334e-142	-0.621445	0.546	0.599	3.03802e-137	Lum-A
Usp16	1.03307e-141	-0.305397	0.882	0.605	3.20799e-137	Lum-A
Kmt2a	1.05667e-141	-0.500486	0.584	0.601	3.28127e-137	Lum-A
Zc3h15	1.33612e-141	-0.43816	0.958	0.81	4.14905e-137	Lum-A
Tbx3	1.42434e-141	-0.432251	0.691	0.556	4.42299e-137	Lum-A
Ccar1	1.51242e-141	-0.32304	0.686	0.531	4.69651e-137	Lum-A
Nasp	1.72018e-141	-0.704157	0.461	0.63	5.34168e-137	Lum-A
Dguok	1.74514e-141	-0.388727	0.555	0.55	5.41918e-137	Lum-A
Arhgef5	2.40394e-141	-0.441563	0.713	0.634	7.46494e-137	Lum-A
Hadh	3.52627e-141	-0.330611	0.65	0.549	1.09501e-136	Lum-A
Brd2	3.53113e-141	-0.467623	0.791	0.708	1.09652e-136	Lum-A
Ddx17	3.55166e-141	-0.447579	0.673	0.612	1.1029e-136	Lum-A
Banf1	3.65478e-141	-0.307598	0.61	0.509	1.13492e-136	Lum-A
Tes	4.51835e-141	-0.46339	0.65	0.587	1.40308e-136	Lum-A
Ewsr1	6.0703e-141	-0.339788	0.731	0.596	1.88501e-136	Lum-A
Kdm1a	7.82422e-141	-0.295366	0.742	0.568	2.42965e-136	Lum-A
Vgll4	8.05244e-141	-0.328668	0.577	0.495	2.50052e-136	Lum-A
Sec11c	1.27604e-140	0.615028	0.995	0.693	3.96248e-136	Lum-A
Sesn3	1.38927e-140	-0.286225	0.668	0.484	4.3141e-136	Lum-A
Smim10l1	1.47496e-140	-0.253031	0.679	0.499	4.5802e-136	Lum-A
Wdr1	1.57972e-140	-0.319598	0.65	0.531	4.9055e-136	Lum-A
Ctbp1	1.59537e-140	-0.301461	0.65	0.529	4.95411e-136	Lum-A
Mapk3	2.17368e-140	-0.372703	0.628	0.51	6.74994e-136	Lum-A
Csnk2a2	2.28405e-140	-0.333938	0.588	0.521	7.09267e-136	Lum-A
Dazap2	2.55819e-140	-0.318665	0.653	0.521	7.94395e-136	Lum-A
R3hdm2	2.73894e-140	-0.351151	0.639	0.538	8.50525e-136	Lum-A
Sf1	3.87773e-140	-0.440346	0.568	0.552	1.20415e-135	Lum-A
Rab21	4.02715e-140	-0.333234	0.697	0.556	1.25055e-135	Lum-A
Alyref	4.66287e-140	-0.347926	0.626	0.52	1.44796e-135	Lum-A
Rab11b	5.5392e-140	-0.343015	0.568	0.512	1.72009e-135	Lum-A
Crebbp	5.65726e-140	-0.474248	0.543	0.586	1.75675e-135	Lum-A
Ap2m1	5.84973e-140	-0.321706	0.588	0.508	1.81652e-135	Lum-A
Ddx46	6.3154e-140	-0.385061	0.652	0.572	1.96112e-135	Lum-A
Eea1	6.96099e-140	-0.322012	0.739	0.563	2.1616e-135	Lum-A
Cd151	7.78197e-140	-0.452511	0.577	0.547	2.41654e-135	Lum-A
Baiap2	1.00088e-139	-0.308764	0.757	0.569	3.10805e-135	Lum-A
Chd3	1.03813e-139	-0.381063	0.686	0.568	3.22369e-135	Lum-A
Tmem256	1.15434e-139	-0.309085	0.918	0.75	3.58457e-135	Lum-A
Larp4	1.63783e-139	-0.320709	0.817	0.631	5.08596e-135	Lum-A
Chmp2a	2.61043e-139	-0.352567	0.969	0.832	8.10618e-135	Lum-A
Chmp4b	3.0243e-139	-0.327642	0.949	0.765	9.39136e-135	Lum-A
Jup	3.62016e-139	-0.384746	0.639	0.57	1.12417e-134	Lum-A
Man1a2	3.91218e-139	-0.597362	0.258	0.588	1.21485e-134	Lum-A
Hnrnph2	4.32453e-139	-0.343284	0.548	0.49	1.3429e-134	Lum-A
Kif5b	5.95354e-139	-0.466096	0.922	0.847	1.84875e-134	Lum-A
Psmd4	7.00949e-139	-0.29564	0.944	0.773	2.17666e-134	Lum-A
Ctnnal1	7.29029e-139	-0.579243	0.586	0.603	2.26386e-134	Lum-A
Fnta	7.45952e-139	-0.332351	0.575	0.501	2.3164e-134	Lum-A
Ranbp2	7.51127e-139	-0.401735	0.695	0.586	2.33247e-134	Lum-A
Cops9	8.87137e-139	-0.301457	0.918	0.732	2.75482e-134	Lum-A
Tsc22d1	9.04605e-139	-0.622006	0.653	0.61	2.80907e-134	Lum-A
Pcbp1	9.32955e-139	-0.360356	0.946	0.815	2.89711e-134	Lum-A
Top2b	1.5848e-138	-0.418869	0.592	0.546	4.92128e-134	Lum-A
Gne	1.74894e-138	0.505905	0.789	0.233	5.43099e-134	Lum-A
Cdk12	1.77042e-138	-0.436964	0.691	0.62	5.4977e-134	Lum-A
Clta	2.0216e-138	-0.436192	0.973	0.905	6.27768e-134	Lum-A
Rsrc2	2.08547e-138	-0.309192	0.886	0.681	6.476e-134	Lum-A
Rnps1	3.46563e-138	-0.29224	0.623	0.492	1.07618e-133	Lum-A
Chd1	4.67922e-138	-0.605612	0.432	0.58	1.45304e-133	Lum-A
Cnot4	6.32397e-138	-0.303313	0.63	0.513	1.96378e-133	Lum-A
Igbp1	6.93461e-138	-0.277256	0.632	0.497	2.1534e-133	Lum-A
Smndc1	6.96636e-138	-0.34136	0.577	0.512	2.16326e-133	Lum-A
Cmpk1	1.01047e-137	0.258945	0.94	0.428	3.13782e-133	Lum-A
Ttc3	1.04532e-137	-0.400894	0.595	0.533	3.24604e-133	Lum-A
Zcchc7	1.21339e-137	-0.317901	0.735	0.559	3.76794e-133	Lum-A
Sbds	1.66285e-137	-0.370646	0.866	0.703	5.16363e-133	Lum-A
Anxa3	1.72315e-137	-1.28327	0.267	0.643	5.35091e-133	Lum-A
Ankrd12	1.87133e-137	-0.48582	0.806	0.66	5.81105e-133	Lum-A
Tcf25	2.06687e-137	-0.392226	0.955	0.814	6.41825e-133	Lum-A
Thap12	2.10905e-137	-0.347622	0.575	0.492	6.54922e-133	Lum-A
Eif2s2	2.45289e-137	-0.593419	0.969	0.914	7.61696e-133	Lum-A
Ubn2	3.68338e-137	-0.278157	0.682	0.495	1.1438e-132	Lum-A
Dnajb9	3.75538e-137	-0.452677	0.802	0.638	1.16616e-132	Lum-A
Snrpc	5.46643e-137	-0.290967	0.617	0.522	1.69749e-132	Lum-A
Lcn2	5.75198e-137	-1.22405	0.042	0.517	1.78616e-132	Lum-A
Gng5	7.60894e-137	-0.584538	0.989	0.97	2.3628e-132	Lum-A
Gpx4	9.4107e-137	-0.46881	0.985	0.941	2.9223e-132	Lum-A
H2-T23	1.09991e-136	-0.362067	0.726	0.567	3.41555e-132	Lum-A
Tinagl1	1.21852e-136	-0.718935	0.038	0.526	3.78388e-132	Lum-A
Ascc3	2.1162e-136	-0.348318	0.71	0.565	6.57142e-132	Lum-A
Sh3bgrl	2.46491e-136	-0.424703	0.515	0.534	7.65429e-132	Lum-A
Ctsz	3.12109e-136	-0.323127	0.637	0.506	9.69193e-132	Lum-A
2007-03-01	3.64096e-136	-0.299875	0.77	0.578	1.13063e-131	Lum-A
Sbno1	4.89939e-136	-0.384453	0.642	0.563	1.52141e-131	Lum-A
2900097C17Rik	4.93318e-136	-0.264294	0.646	0.48	1.5319e-131	Lum-A
Atrx	5.00313e-136	-0.428675	0.878	0.76	1.55362e-131	Lum-A
Lamp2	6.55687e-136	-0.313771	0.947	0.78	2.03611e-131	Lum-A
Foxa1	7.94352e-136	-0.325455	0.789	0.622	2.4667e-131	Lum-A
Lsm8	7.98097e-136	-0.338958	0.613	0.489	2.47833e-131	Lum-A
Cnih4	1.08413e-135	-0.26895	0.653	0.496	3.36656e-131	Lum-A
Atp2a2	1.14451e-135	-0.41123	0.768	0.651	3.55406e-131	Lum-A
Vdac2	1.54496e-135	-0.343172	0.933	0.807	4.79756e-131	Lum-A
Klf9	1.56877e-135	-0.464955	0.799	0.657	4.87149e-131	Lum-A
Cdh1	1.60116e-135	-0.47716	0.681	0.576	4.97208e-131	Lum-A
Ptp4a1	1.69831e-135	-0.519114	0.606	0.592	5.27376e-131	Lum-A
Dnajc5	1.8368e-135	-0.320685	0.624	0.499	5.70381e-131	Lum-A
Tnrc6b	2.54366e-135	-0.380696	0.655	0.565	7.89884e-131	Lum-A
Cdk11b	2.63e-135	-0.339415	0.628	0.54	8.16694e-131	Lum-A
Ccdc50	3.06134e-135	-0.252656	0.644	0.454	9.50637e-131	Lum-A
Ndufa6	3.96131e-135	-0.492854	0.969	0.931	1.23011e-130	Lum-A
Wdr45b	6.7192e-135	-0.326666	0.588	0.488	2.08651e-130	Lum-A
Usp9x	9.83137e-135	-0.35484	0.642	0.531	3.05294e-130	Lum-A
Tshz2	1.04264e-134	-0.82794	0.421	0.655	3.23771e-130	Lum-A
Gnb2	1.04472e-134	-0.384111	0.967	0.854	3.24417e-130	Lum-A
Snrnp48	1.10423e-134	-0.375011	0.592	0.534	3.42896e-130	Lum-A
Urah	1.55268e-134	-0.329034	0.597	0.471	4.82152e-130	Lum-A
Nfic	1.61818e-134	-0.395478	0.583	0.509	5.02493e-130	Lum-A
Ncor1	1.74959e-134	-0.338859	0.926	0.786	5.433e-130	Lum-A
Enah	1.77532e-134	-0.428264	0.626	0.566	5.51291e-130	Lum-A
Nap1l4	1.79805e-134	-0.279048	0.623	0.49	5.58349e-130	Lum-A
Srm	2.00936e-134	0.309224	0.891	0.351	6.23968e-130	Lum-A
Secisbp2l	2.30656e-134	-0.340874	0.603	0.484	7.16256e-130	Lum-A
Hint1	2.50617e-134	-0.495956	0.985	0.969	7.78241e-130	Lum-A
Ndufb8	3.24242e-134	-0.375894	0.967	0.871	1.00687e-129	Lum-A
Calu	4.27452e-134	-0.258817	0.601	0.454	1.32737e-129	Lum-A
Zfp131	4.34726e-134	-0.605211	0.517	0.59	1.34995e-129	Lum-A
Dtymk	5.10299e-134	-0.275497	0.612	0.467	1.58463e-129	Lum-A
Arpc4	5.47283e-134	-0.265273	0.648	0.511	1.69948e-129	Lum-A
Ccnl2	6.01705e-134	-0.285044	0.652	0.489	1.86847e-129	Lum-A
Prrc2a	6.56309e-134	-0.280777	0.642	0.504	2.03804e-129	Lum-A
Mrto4	9.56468e-134	-0.280256	0.566	0.434	2.97012e-129	Lum-A
Wwp1	1.0446e-133	-0.39216	0.621	0.529	3.2438e-129	Lum-A
Azin1	1.20453e-133	-0.646425	0.806	0.695	3.74043e-129	Lum-A
Cldnd1	1.30178e-133	-0.350036	0.552	0.484	4.04241e-129	Lum-A
Krt19	1.74406e-133	-1.16429	0.975	0.682	5.41583e-129	Lum-A
Bod1l	1.78814e-133	-0.346895	0.697	0.582	5.55272e-129	Lum-A
Eif3a	2.36416e-133	-0.464013	0.927	0.852	7.34141e-129	Lum-A
Aldoa	2.72969e-133	-0.499132	0.964	0.875	8.47651e-129	Lum-A
Papss1	2.78489e-133	-0.278988	0.915	0.696	8.64793e-129	Lum-A
Lsm7	3.89612e-133	-0.28995	0.563	0.458	1.20986e-128	Lum-A
Smarca2	4.61192e-133	-0.520905	0.519	0.557	1.43214e-128	Lum-A
Twistnb	4.71755e-133	-0.28223	0.586	0.456	1.46494e-128	Lum-A
Ubl3	4.98192e-133	-0.278385	0.603	0.469	1.54703e-128	Lum-A
Thoc2	4.98804e-133	-0.263681	0.838	0.625	1.54894e-128	Lum-A
Gpx1	5.79516e-133	-0.719294	0.966	0.908	1.79957e-128	Lum-A
Jund	5.98289e-133	-0.811429	0.985	0.976	1.85787e-128	Lum-A
Rnaseh2c	6.53362e-133	-0.256355	0.693	0.518	2.02889e-128	Lum-A
Ankhd1	6.74745e-133	-0.266524	0.61	0.447	2.09529e-128	Lum-A
Dhx9	1.37416e-132	-0.397368	0.61	0.55	4.26718e-128	Lum-A
Ppp4r3b	1.42357e-132	-0.299525	0.599	0.496	4.4206e-128	Lum-A
Fam133b	1.80371e-132	-0.310309	0.623	0.462	5.60105e-128	Lum-A
Tox4	2.17049e-132	-0.267585	0.621	0.469	6.74001e-128	Lum-A
Vezf1	2.85156e-132	-0.434915	0.517	0.538	8.85494e-128	Lum-A
Phf20l1	3.33987e-132	-0.321743	0.637	0.509	1.03713e-127	Lum-A
Aggf1	4.0251e-132	-0.310046	0.564	0.473	1.24991e-127	Lum-A
Usp7	4.65028e-132	-0.293893	0.617	0.491	1.44405e-127	Lum-A
Atp5o.1	5.34955e-132	-0.338853	0.975	0.861	1.6612e-127	Lum-A
Eno1	5.66563e-132	-0.302038	0.681	0.509	1.75935e-127	Lum-A
Morf4l2	5.87055e-132	-0.2642	0.875	0.66	1.82298e-127	Lum-A
Ehd4	6.03088e-132	-0.275752	0.804	0.53	1.87277e-127	Lum-A
Atp6v1c2	6.34381e-132	-0.369728	0.452	0.21	1.96994e-127	Lum-A
Inmt	1.34347e-131	-1.21827	0.027	0.493	4.17189e-127	Lum-A
Ube2v2	1.56938e-131	-0.264365	0.595	0.465	4.87339e-127	Lum-A
Scgb2b7	1.79374e-131	2.95687	0.51	0.089	5.5701e-127	Lum-A
Ptges	1.80436e-131	-0.437508	0.641	0.605	5.60307e-127	Lum-A
Prrc2b	1.82896e-131	-0.262685	0.574	0.443	5.67946e-127	Lum-A
Nolc1	2.05814e-131	-0.341073	0.672	0.522	6.39115e-127	Lum-A
Tulp4	2.2225e-131	-0.340231	0.662	0.537	6.90153e-127	Lum-A
Atp5j	2.49025e-131	-0.422928	0.978	0.933	7.73298e-127	Lum-A
Dusp6	3.31043e-131	-1.14996	0.067	0.527	1.02799e-126	Lum-A
Mif	3.57049e-131	-0.454299	0.958	0.842	1.10874e-126	Lum-A
Emd	4.66939e-131	-0.445295	0.586	0.541	1.44998e-126	Lum-A
Ppp2r2d	4.86326e-131	-0.253155	0.637	0.456	1.51019e-126	Lum-A
Ptpn11	6.04736e-131	-0.322009	0.51	0.468	1.87789e-126	Lum-A
Yme1l1	7.8111e-131	-0.262188	0.65	0.476	2.42558e-126	Lum-A
Zcchc6	8.03122e-131	-0.266515	0.706	0.513	2.49393e-126	Lum-A
Erp29	8.31939e-131	-0.307245	0.96	0.729	2.58342e-126	Lum-A
Pgls	8.95325e-131	-0.31254	0.958	0.813	2.78025e-126	Lum-A
Idh2	9.69234e-131	-0.299726	0.706	0.54	3.00976e-126	Lum-A
Ebpl	9.77477e-131	-0.273398	0.637	0.479	3.03536e-126	Lum-A
Ndufb7	1.1211e-130	-0.258015	0.962	0.78	3.48136e-126	Lum-A
Mbnl1	1.14688e-130	-0.574773	0.372	0.566	3.56141e-126	Lum-A
Zfp664	1.2076e-130	-0.257076	0.642	0.47	3.74998e-126	Lum-A
Capg	1.50434e-130	-0.56192	0.535	0.561	4.67142e-126	Lum-A
Rbm5	1.80276e-130	-0.295889	0.623	0.485	5.5981e-126	Lum-A
Park7	1.81739e-130	-0.43999	0.98	0.931	5.64353e-126	Lum-A
Anp32e	2.32727e-130	-0.331494	0.555	0.497	7.22687e-126	Lum-A
Clu	2.78405e-130	-1.98115	0.73	0.413	8.64531e-126	Lum-A
Alcam	2.80918e-130	-0.469718	0.544	0.417	8.72336e-126	Lum-A
Scp2	3.847e-130	-0.291778	0.947	0.793	1.19461e-125	Lum-A
Clk4	4.01001e-130	-0.299836	0.672	0.505	1.24523e-125	Lum-A
Arl6ip5	4.65301e-130	-0.376479	0.721	0.546	1.4449e-125	Lum-A
Tln1	5.13677e-130	-0.527127	0.465	0.578	1.59512e-125	Lum-A
Ccser2	5.48826e-130	-0.381014	0.581	0.476	1.70427e-125	Lum-A
Btbd7	8.68616e-130	-0.402999	0.554	0.545	2.69731e-125	Lum-A
Stag2	1.10094e-129	-0.430877	0.501	0.53	3.41874e-125	Lum-A
Akirin2	1.32755e-129	-0.279844	0.644	0.489	4.12243e-125	Lum-A
Med13	1.51772e-129	-0.445841	0.53	0.507	4.71297e-125	Lum-A
Ntan1	1.98439e-129	-0.269568	0.57	0.449	6.16214e-125	Lum-A
Spty2d1	2.3428e-129	-0.284128	0.737	0.54	7.27508e-125	Lum-A
Csad	2.85584e-129	-0.28397	0.623	0.478	8.86825e-125	Lum-A
Wdr43	2.98051e-129	-0.324883	0.668	0.508	9.25538e-125	Lum-A
Plet1	3.53502e-129	-0.440299	0.702	0.446	1.09773e-124	Lum-A
Tgm2	4.18619e-129	-0.828075	0.018	0.482	1.29994e-124	Lum-A
Acadvl	4.50855e-129	-0.274137	0.568	0.464	1.40004e-124	Lum-A
Rbpms	7.13343e-129	-0.677921	0.263	0.543	2.21514e-124	Lum-A
Eif3i	1.22426e-128	-0.37553	0.962	0.862	3.80168e-124	Lum-A
Psmb2	1.56284e-128	-0.336969	0.967	0.842	4.85307e-124	Lum-A
Map2k3	1.65296e-128	-0.601503	0.483	0.562	5.13292e-124	Lum-A
Wnt4	2.06501e-128	-0.835903	0.172	0.576	6.41246e-124	Lum-A
Gm10073	2.2638e-128	-0.260977	0.61	0.432	7.02979e-124	Lum-A
Dhx36	2.31047e-128	-0.31144	0.699	0.555	7.17472e-124	Lum-A
Ypel3	2.75121e-128	-0.296113	0.721	0.525	8.54334e-124	Lum-A
Kdm6b	3.61134e-128	-0.533776	0.592	0.567	1.12143e-123	Lum-A
Stat3	3.93287e-128	-0.553091	0.541	0.555	1.22128e-123	Lum-A
Psmb6	4.42116e-128	-0.349574	0.962	0.865	1.3729e-123	Lum-A
Aldh1a7	4.49642e-128	-0.557679	0.385	0.437	1.39627e-123	Lum-A
Senp2	5.09481e-128	-0.38854	0.632	0.566	1.58209e-123	Lum-A
Ier5	5.31854e-128	-1.04666	0.109	0.564	1.65157e-123	Lum-A
Pole4	5.8258e-128	-0.327415	0.681	0.532	1.80909e-123	Lum-A
Csnk2a1	7.50391e-128	-0.251751	0.628	0.473	2.33019e-123	Lum-A
Macf1	1.32739e-127	-0.421099	0.59	0.549	4.12193e-123	Lum-A
Dync1h1	1.35847e-127	-0.294157	0.673	0.506	4.21845e-123	Lum-A
Lmna	1.56079e-127	-0.629007	0.938	0.858	4.84671e-123	Lum-A
Tm9sf3	1.62747e-127	-0.481362	0.956	0.843	5.05377e-123	Lum-A
Csrnp1	1.73596e-127	-0.671821	0.377	0.548	5.39068e-123	Lum-A
Tax1bp3	5.15992e-127	-0.339377	0.517	0.478	1.60231e-122	Lum-A
Mrpl30	5.34065e-127	-0.266827	0.929	0.754	1.65843e-122	Lum-A
Abi1	5.74126e-127	-0.27538	0.581	0.457	1.78283e-122	Lum-A
Nans	6.08427e-127	0.28924	0.975	0.494	1.88935e-122	Lum-A
2010111I01Rik	6.45042e-127	-0.295682	0.642	0.48	2.00305e-122	Lum-A
Arf6	7.21662e-127	-0.308244	0.621	0.502	2.24098e-122	Lum-A
Car2	1.22825e-126	-1.1226	0.074	0.559	3.81409e-122	Lum-A
Setd5	1.25504e-126	-0.348485	0.55	0.487	3.89728e-122	Lum-A
Celf1	2.69965e-126	-0.273744	0.581	0.449	8.38323e-122	Lum-A
Dcxr	3.2746e-126	0.572471	0.985	0.599	1.01686e-121	Lum-A
Elob	3.34866e-126	-0.423131	0.989	0.941	1.03986e-121	Lum-A
Mfge8	3.78059e-126	-0.645378	0.528	0.586	1.17399e-121	Lum-A
Srek1	4.19858e-126	-0.256989	0.719	0.522	1.30378e-121	Lum-A
Nfat5	4.46762e-126	-0.521998	0.635	0.63	1.38733e-121	Lum-A
Nop56	5.66918e-126	-0.257866	0.679	0.49	1.76045e-121	Lum-A
Stx7	6.15253e-126	-0.251917	0.583	0.446	1.91054e-121	Lum-A
mt-Nd2	7.27244e-126	-0.622017	0.969	0.993	2.25831e-121	Lum-A
Nrd1	8.49855e-126	-0.28942	0.612	0.487	2.63905e-121	Lum-A
Atp5g3	1.07504e-125	-0.320163	0.949	0.824	3.33833e-121	Lum-A
Tram1	1.37022e-125	0.305948	0.971	0.489	4.25496e-121	Lum-A
Rhob	2.77882e-125	-0.500301	0.603	0.553	8.62906e-121	Lum-A
Kif21a	2.78576e-125	-0.269207	0.577	0.443	8.65062e-121	Lum-A
Cxadr	3.33407e-125	-0.739275	0.537	0.599	1.03533e-120	Lum-A
Zfand5	3.77068e-125	-0.713979	0.887	0.856	1.17091e-120	Lum-A
Serpinb6a	4.04543e-125	-0.288939	0.922	0.721	1.25623e-120	Lum-A
Wbp11	4.06346e-125	-0.325783	0.579	0.499	1.26183e-120	Lum-A
Klf13	5.60483e-125	-0.608016	0.285	0.546	1.74047e-120	Lum-A
Dnajb4	7.78964e-125	-0.417335	0.639	0.542	2.41892e-120	Lum-A
Sh3glb1	7.88172e-125	-0.260725	0.931	0.733	2.44751e-120	Lum-A
Rbm26	8.23854e-125	-0.327868	0.677	0.539	2.55831e-120	Lum-A
Mgst3	8.60976e-125	-0.394254	0.884	0.727	2.67359e-120	Lum-A
Nipa2	9.67002e-125	-0.324673	0.632	0.479	3.00283e-120	Lum-A
Manbal	1.24074e-124	-0.260777	0.579	0.443	3.85286e-120	Lum-A
Txnrd1	1.35261e-124	-0.616805	0.572	0.589	4.20027e-120	Lum-A
Fosb	1.42509e-124	-1.05137	0.739	0.838	4.42534e-120	Lum-A
Zfr	2.02815e-124	-0.352418	0.566	0.51	6.29801e-120	Lum-A
Prdx1	2.36757e-124	-0.52404	0.985	0.967	7.35201e-120	Lum-A
Pttg1ip	2.37033e-124	-0.288429	0.586	0.474	7.36058e-120	Lum-A
Id2	4.08508e-124	-0.968481	0.359	0.621	1.26854e-119	Lum-A
Zmynd11	5.03552e-124	-0.274021	0.608	0.468	1.56368e-119	Lum-A
Ndel1	5.09952e-124	-0.344527	0.566	0.495	1.58355e-119	Lum-A
Oser1	5.40709e-124	-0.325846	0.751	0.582	1.67906e-119	Lum-A
Arid4a	5.58557e-124	-0.256858	0.628	0.454	1.73449e-119	Lum-A
Anapc11	6.75316e-124	-0.257824	0.584	0.476	2.09706e-119	Lum-A
Naa15	7.51746e-124	-0.398395	0.568	0.533	2.3344e-119	Lum-A
Atp6ap2	8.23607e-124	-0.347178	0.822	0.56	2.55755e-119	Lum-A
Tmem159	8.44098e-124	-0.297631	0.748	0.511	2.62118e-119	Lum-A
Tmod3	1.00715e-123	-0.285852	0.541	0.438	3.12749e-119	Lum-A
Ppp1r10	1.18055e-123	-0.593222	0.748	0.693	3.66596e-119	Lum-A
Creld2	1.21716e-123	-0.340185	0.829	0.38	3.77966e-119	Lum-A
Gnas	1.48871e-123	-0.510482	0.989	0.976	4.62289e-119	Lum-A
Prpf38a	1.54814e-123	-0.326076	0.53	0.465	4.80745e-119	Lum-A
Krtcap3	2.26156e-123	-0.253776	0.532	0.418	7.02283e-119	Lum-A
Mllt10	2.80755e-123	-0.254677	0.564	0.433	8.71827e-119	Lum-A
Larp4b	3.15414e-123	-0.251205	0.539	0.421	9.79456e-119	Lum-A
Gata3	3.19156e-123	-0.622936	0.416	0.534	9.91076e-119	Lum-A
Syne2	3.89685e-123	-0.486825	0.508	0.522	1.21009e-118	Lum-A
Nsd1	3.9223e-123	-0.255808	0.675	0.497	1.21799e-118	Lum-A
Zfp148	4.87002e-123	-0.260873	0.628	0.476	1.51229e-118	Lum-A
Slk	6.27891e-123	-0.522267	0.448	0.543	1.94979e-118	Lum-A
Pold4	7.21259e-123	-0.302326	0.552	0.474	2.23972e-118	Lum-A
Lbp	7.64276e-123	-0.91023	0.537	0.648	2.37331e-118	Lum-A
Bri3	1.03538e-122	-0.39457	0.944	0.807	3.21517e-118	Lum-A
Ptbp1	1.08597e-122	-0.306421	0.619	0.51	3.37225e-118	Lum-A
Srsf1	1.1598e-122	-0.309682	0.544	0.461	3.60154e-118	Lum-A
Mkln1	1.16964e-122	-0.288852	0.659	0.505	3.63207e-118	Lum-A
Atp5k	1.21393e-122	-0.284543	0.955	0.783	3.76961e-118	Lum-A
Ubtf	1.72002e-122	-0.311765	0.574	0.498	5.34119e-118	Lum-A
St13	1.78907e-122	-0.264975	0.96	0.767	5.55559e-118	Lum-A
Supt6	3.27063e-122	-0.306977	0.641	0.504	1.01563e-117	Lum-A
Sms	5.08376e-122	-0.37792	0.515	0.478	1.57866e-117	Lum-A
Fbxw2	5.68013e-122	-0.250383	0.534	0.412	1.76385e-117	Lum-A
Akr1b3	6.98305e-122	-0.664814	0.897	0.545	2.16845e-117	Lum-A
Kdm5a	1.44117e-121	-0.305692	0.566	0.48	4.47525e-117	Lum-A
Taok1	2.25359e-121	-0.362004	0.479	0.47	6.99808e-117	Lum-A
Akap13	2.4704e-121	-0.385218	0.682	0.517	7.67134e-117	Lum-A
Ptpn14	2.55849e-121	-0.623986	0.272	0.47	7.94489e-117	Lum-A
Arih1	2.59884e-121	-0.369447	0.554	0.51	8.07017e-117	Lum-A
Nectin2	2.7312e-121	-0.386222	0.555	0.513	8.48119e-117	Lum-A
Sf3b3	3.75622e-121	-0.363266	0.544	0.498	1.16642e-116	Lum-A
Eml4	4.83531e-121	-0.374343	0.512	0.473	1.50151e-116	Lum-A
Nisch	5.04159e-121	-0.301997	0.552	0.46	1.56557e-116	Lum-A
Cab39	7.10072e-121	-0.272528	0.628	0.512	2.20499e-116	Lum-A
Wdr89	7.54741e-121	-0.252476	0.635	0.469	2.3437e-116	Lum-A
Dynll1	9.31529e-121	-0.659331	0.985	0.954	2.89268e-116	Lum-A
Bzw2	1.27573e-120	-0.256865	0.706	0.496	3.96152e-116	Lum-A
Acadm	3.21044e-120	-0.327777	0.568	0.497	9.96938e-116	Lum-A
Selenok	4.29172e-120	-0.450933	0.975	0.899	1.33271e-115	Lum-A
Foxn3	4.3753e-120	-0.416704	0.468	0.508	1.35866e-115	Lum-A
Cpne3	4.97371e-120	-0.27277	0.559	0.442	1.54449e-115	Lum-A
Lima1	6.69461e-120	-0.47277	0.897	0.805	2.07888e-115	Lum-A
Add3	7.26755e-120	-0.331904	0.662	0.534	2.25679e-115	Lum-A
Tnrc6c	7.74069e-120	-0.445621	0.523	0.556	2.40372e-115	Lum-A
Atp5b	9.24821e-120	-0.474809	0.975	0.946	2.87185e-115	Lum-A
Rps27rt	1.3518e-119	-0.424425	0.535	0.547	4.19775e-115	Lum-A
Ddx3y	1.36996e-119	-0.415574	0.561	0.543	4.25415e-115	Lum-A
Mark3	1.74301e-119	-0.258108	0.577	0.443	5.41258e-115	Lum-A
Smchd1	1.81838e-119	-0.388175	0.519	0.509	5.64661e-115	Lum-A
Pam	2.04433e-119	-0.287122	0.583	0.443	6.34826e-115	Lum-A
Sntb2	2.67269e-119	-0.447007	0.501	0.523	8.2995e-115	Lum-A
Mthfd2	3.58594e-119	-0.278952	0.497	0.398	1.11354e-114	Lum-A
Uqcrb	4.11783e-119	-0.406065	0.967	0.917	1.27871e-114	Lum-A
Marcksl1	5.16843e-119	-0.758673	0.049	0.488	1.60495e-114	Lum-A
Tob1	5.68512e-119	-0.392593	0.675	0.573	1.7654e-114	Lum-A
Fam220a	6.64834e-119	-0.254845	0.603	0.429	2.06451e-114	Lum-A
Rnf128	9.14103e-119	-0.337296	0.51	0.469	2.83856e-114	Lum-A
Scarb2	1.06393e-118	-0.284512	0.546	0.444	3.30381e-114	Lum-A
Hes1	1.09984e-118	-0.720944	0.76	0.703	3.41534e-114	Lum-A
Bdp1	1.17232e-118	-0.461228	0.439	0.498	3.6404e-114	Lum-A
Sox9	1.37329e-118	-0.573465	0.682	0.592	4.26448e-114	Lum-A
Ttc14	1.43833e-118	-0.370093	0.639	0.56	4.46644e-114	Lum-A
Fam120a	1.84022e-118	-0.26222	0.49	0.413	5.71444e-114	Lum-A
Mapkapk2	2.36056e-118	-0.354818	0.505	0.49	7.33026e-114	Lum-A
Gsta4	2.69533e-118	-0.397459	0.808	0.516	8.36981e-114	Lum-A
Pum2	4.16852e-118	-0.346744	0.474	0.458	1.29445e-113	Lum-A
Bag1	4.68228e-118	-0.313156	0.947	0.802	1.45399e-113	Lum-A
Suco	4.72344e-118	-0.283078	0.886	0.678	1.46677e-113	Lum-A
Psma3	5.01438e-118	-0.350466	0.958	0.859	1.55712e-113	Lum-A
Tfdp2	5.11027e-118	-0.289474	0.506	0.416	1.58689e-113	Lum-A
Ccnt1	5.3326e-118	-0.307253	0.543	0.461	1.65593e-113	Lum-A
Amotl1	5.75679e-118	-0.542073	0.465	0.532	1.78766e-113	Lum-A
Hook3	8.42604e-118	-0.289938	0.623	0.491	2.61654e-113	Lum-A
Gtf2i	9.02408e-118	-0.391682	0.434	0.493	2.80225e-113	Lum-A
Tardbp	9.63446e-118	-0.316016	0.621	0.509	2.99179e-113	Lum-A
Taf1d	1.19758e-117	-0.415536	0.735	0.636	3.71885e-113	Lum-A
Kmt2c	1.31809e-117	-0.277219	0.682	0.532	4.09306e-113	Lum-A
Cyb5a	1.48263e-117	-0.281541	0.971	0.803	4.604e-113	Lum-A
Pqlc1	2.54794e-117	-0.48955	0.617	0.501	7.91212e-113	Lum-A
Man1a	3.9067e-117	-0.577802	0.721	0.451	1.21315e-112	Lum-A
Akr1a1	4.79647e-117	-0.311446	0.964	0.818	1.48945e-112	Lum-A
Psmb3	5.2271e-117	-0.277193	0.953	0.805	1.62317e-112	Lum-A
Stag1	5.76838e-117	-0.426389	0.49	0.521	1.79125e-112	Lum-A
Chtop	8.05278e-117	-0.277358	0.532	0.446	2.50063e-112	Lum-A
Atp13a3	9.7321e-117	-0.499019	0.465	0.529	3.02211e-112	Lum-A
Bbx	1.04443e-116	-0.292904	0.574	0.476	3.24328e-112	Lum-A
Wars	1.59478e-116	-0.291954	0.557	0.339	4.95226e-112	Lum-A
Tmem45a	1.80634e-116	-0.256161	0.525	0.27	5.60923e-112	Lum-A
Cwc22	2.10709e-116	-0.394036	0.713	0.587	6.54315e-112	Lum-A
Pik3r1	2.37141e-116	-0.547427	0.497	0.53	7.36393e-112	Lum-A
Wwc2	2.85742e-116	-0.255632	0.523	0.403	8.87313e-112	Lum-A
Igfbp5	3.05786e-116	-0.992454	0.031	0.462	9.49557e-112	Lum-A
Rabep1	3.66987e-116	-0.332316	0.505	0.465	1.13961e-111	Lum-A
Nop14	3.74155e-116	-0.33198	0.572	0.487	1.16186e-111	Lum-A
Serinc3	9.02306e-116	-0.403761	0.96	0.834	2.80193e-111	Lum-A
Myo6	9.26235e-116	-0.410589	0.534	0.505	2.87624e-111	Lum-A
Nktr	1.06187e-115	-0.317366	0.891	0.702	3.29743e-111	Lum-A
Pnrc1	1.23128e-115	-0.714373	0.985	0.943	3.82349e-111	Lum-A
Tsc22d2	1.33085e-115	-0.577814	0.624	0.592	4.13269e-111	Lum-A
Smad1	1.4652e-115	-0.371124	0.461	0.483	4.54988e-111	Lum-A
Smad7	1.51091e-115	-0.702932	0.374	0.582	4.69184e-111	Lum-A
Tomm7	1.62828e-115	-0.396144	0.967	0.882	5.05629e-111	Lum-A
Mef2a	2.25957e-115	-0.420334	0.461	0.513	7.01664e-111	Lum-A
Fip1l1	2.4306e-115	-0.275738	0.552	0.448	7.54774e-111	Lum-A
Rpl10	2.44465e-115	-0.500702	0.998	0.996	7.59137e-111	Lum-A
Sptssa	3.1997e-115	-0.352669	0.964	0.769	9.93604e-111	Lum-A
Runx1	4.04796e-115	-0.709106	0.372	0.549	1.25701e-110	Lum-A
Itpk1	4.68491e-115	-0.288651	0.537	0.392	1.45481e-110	Lum-A
Zfp36l2	6.76368e-115	-0.829745	0.114	0.524	2.10033e-110	Lum-A
Safb	7.24258e-115	-0.284042	0.563	0.451	2.24904e-110	Lum-A
Cldn7	8.83178e-115	-0.458614	0.94	0.713	2.74253e-110	Lum-A
Zfp652	1.04864e-114	-0.262741	0.557	0.44	3.25634e-110	Lum-A
Acsl4	1.2929e-114	-0.400485	0.517	0.483	4.01486e-110	Lum-A
Rsf1	1.51027e-114	-0.307236	0.548	0.462	4.68985e-110	Lum-A
Ppp1r15a	1.52404e-114	-0.576607	0.704	0.686	4.73262e-110	Lum-A
Sppl2a	1.5758e-114	0.319307	0.906	0.411	4.89333e-110	Lum-A
Ccdc86	1.89103e-114	-0.259848	0.525	0.381	5.87221e-110	Lum-A
Trim44	2.19747e-114	-0.369095	0.534	0.485	6.82381e-110	Lum-A
Vmp1	3.25401e-114	-0.446126	0.92	0.775	1.01047e-109	Lum-A
Phb	4.66827e-114	-0.254455	0.485	0.4	1.44964e-109	Lum-A
Larp1	4.77779e-114	-0.268856	0.548	0.43	1.48365e-109	Lum-A
Cdk13	4.89449e-114	-0.33198	0.508	0.451	1.51989e-109	Lum-A
Smc6	5.94835e-114	-0.32972	0.488	0.455	1.84714e-109	Lum-A
Fnbp1l	6.20265e-114	-0.468151	0.452	0.531	1.92611e-109	Lum-A
Cyfip1	7.21609e-114	-0.25608	0.526	0.426	2.24081e-109	Lum-A
Ubxn4	7.26431e-114	-0.306313	0.931	0.79	2.25579e-109	Lum-A
mt-Atp8	8.5034e-114	-0.260569	0.864	0.641	2.64056e-109	Lum-A
Vcl	1.03814e-113	-0.304151	0.563	0.447	3.22375e-109	Lum-A
Slc25a36	1.09639e-113	-0.26306	0.557	0.401	3.40463e-109	Lum-A
Frg1	1.21174e-113	-0.263187	0.561	0.445	3.7628e-109	Lum-A
Smarce1	1.34505e-113	-0.257729	0.495	0.414	4.17679e-109	Lum-A
Ralbp1	1.36997e-113	-0.446562	0.949	0.825	4.25417e-109	Lum-A
Trp53	1.44109e-113	-0.327082	0.466	0.445	4.47502e-109	Lum-A
Psma2	1.72937e-113	-0.274451	0.964	0.829	5.37021e-109	Lum-A
Adss	2.08534e-113	-0.262362	0.495	0.421	6.47562e-109	Lum-A
Fermt1	2.98125e-113	-0.3774	0.381	0.375	9.25768e-109	Lum-A
Bmpr1a	3.79626e-113	-0.334533	0.466	0.458	1.17885e-108	Lum-A
Cuedc1	6.19133e-113	-0.313406	0.517	0.443	1.92259e-108	Lum-A
Pdia4	1.20862e-112	-0.341599	0.846	0.543	3.75313e-108	Lum-A
Pbxip1	1.27367e-112	-0.26884	0.534	0.411	3.95512e-108	Lum-A
Cox6a1	1.29341e-112	-0.251248	0.971	0.804	4.01642e-108	Lum-A
Stk17b	1.53473e-112	-0.660616	0.461	0.562	4.7658e-108	Lum-A
Arhgef12	1.78107e-112	-0.416522	0.45	0.499	5.53074e-108	Lum-A
2010107E04Rik	1.92663e-112	-0.287023	0.949	0.803	5.98275e-108	Lum-A
2002-03-01	2.10983e-112	-0.326724	0.958	0.827	6.55165e-108	Lum-A
Mdm2	2.49385e-112	-0.341355	0.495	0.445	7.74416e-108	Lum-A
Plscr1	2.82619e-112	-0.325195	0.673	0.479	8.77616e-108	Lum-A
Irf2bp2	3.39285e-112	-0.359834	0.495	0.469	1.05358e-107	Lum-A
Rlim	3.92228e-112	-0.353335	0.519	0.465	1.21798e-107	Lum-A
Tiparp	5.95609e-112	-0.741754	0.361	0.562	1.84954e-107	Lum-A
Cnot7	1.40457e-111	-0.281186	0.517	0.447	4.3616e-107	Lum-A
Zranb1	2.17462e-111	-0.306248	0.503	0.434	6.75286e-107	Lum-A
Aes	2.294e-111	-0.319038	0.969	0.841	7.12355e-107	Lum-A
Cox6b1	2.48851e-111	-0.41425	0.973	0.94	7.72758e-107	Lum-A
Ints6	2.92127e-111	-0.361949	0.648	0.537	9.07141e-107	Lum-A
Reep5	3.20698e-111	-0.364019	0.956	0.836	9.95865e-107	Lum-A
Psmb4	6.67129e-111	-0.319528	0.956	0.847	2.07164e-106	Lum-A
Polr2h	7.90927e-111	-0.250022	0.466	0.385	2.45607e-106	Lum-A
Dag1	8.97477e-111	-0.30751	0.492	0.442	2.78694e-106	Lum-A
Tmpo	1.17236e-110	-0.358326	0.461	0.457	3.64052e-106	Lum-A
Ibsp	1.82759e-110	1.54172	0.29	0.012	5.6752e-106	Lum-A
Tgif1	2.31492e-110	-0.459697	0.592	0.527	7.18852e-106	Lum-A
Slc7a1	4.37988e-110	-0.528358	0.26	0.499	1.36008e-105	Lum-A
Nmd3	5.84523e-110	-0.263286	0.477	0.392	1.81512e-105	Lum-A
Taf7	6.55448e-110	-0.36908	0.481	0.471	2.03536e-105	Lum-A
Eif5b	7.27834e-110	-0.350328	0.936	0.801	2.26014e-105	Lum-A
Baz1b	8.27991e-110	-0.294361	0.561	0.463	2.57116e-105	Lum-A
Cpd	9.02854e-110	-0.528027	0.078	0.487	2.80363e-105	Lum-A
Scmh1	9.33379e-110	-0.261231	0.506	0.402	2.89842e-105	Lum-A
Gnaq	2.25466e-109	-0.355635	0.419	0.458	7.0014e-105	Lum-A
Sgk1	2.3035e-109	-1.00985	0.532	0.643	7.15304e-105	Lum-A
Far1	2.54641e-109	-0.269916	0.55	0.45	7.90738e-105	Lum-A
Gtf2f1	2.74651e-109	-0.265918	0.512	0.403	8.52873e-105	Lum-A
Zfp36	2.8012e-109	-0.626858	0.684	0.704	8.69855e-105	Lum-A
Slc5a3	3.28502e-109	-0.736139	0.256	0.518	1.0201e-104	Lum-A
Nrip1	4.41552e-109	-0.467622	0.846	0.732	1.37115e-104	Lum-A
Atp5c1	5.09775e-109	-0.340707	0.973	0.878	1.583e-104	Lum-A
Elf2	5.39273e-109	-0.321509	0.499	0.452	1.67461e-104	Lum-A
Tcf4	9.08405e-109	-0.369428	0.457	0.432	2.82087e-104	Lum-A
Cnot6l	1.42956e-108	-0.376409	0.403	0.473	4.43923e-104	Lum-A
Fndc3b	2.72272e-108	-0.299298	0.477	0.424	8.45487e-104	Lum-A
Cdc42ep5	3.55602e-108	-0.468367	0.561	0.521	1.10425e-103	Lum-A
Mafk	3.56339e-108	-0.41631	0.437	0.484	1.10654e-103	Lum-A
Mrfap1	4.2353e-108	-0.357971	0.96	0.872	1.31519e-103	Lum-A
Dnajc2	4.26902e-108	-0.338018	0.501	0.436	1.32566e-103	Lum-A
Trip12	4.28952e-108	-0.284104	0.561	0.451	1.33203e-103	Lum-A
Cstf3	5.66059e-108	-0.340431	0.537	0.452	1.75778e-103	Lum-A
Zfp326	7.40816e-108	-0.401527	0.445	0.502	2.30046e-103	Lum-A
Lancl1	7.57076e-108	-0.282987	0.461	0.396	2.35095e-103	Lum-A
Slbp	7.98748e-108	-0.478021	0.461	0.52	2.48035e-103	Lum-A
Pgk1	1.03604e-107	-0.338501	0.833	0.734	3.21721e-103	Lum-A
Apc	1.17858e-107	-0.271195	0.546	0.432	3.65986e-103	Lum-A
Atp5j2	1.20898e-107	-0.406904	0.982	0.943	3.75423e-103	Lum-A
Asph	1.66506e-107	-0.449488	0.479	0.52	5.1705e-103	Lum-A
Cd3eap	2.66422e-107	-0.297281	0.521	0.418	8.27321e-103	Lum-A
Ubap2	2.95252e-107	-0.303026	0.452	0.415	9.16845e-103	Lum-A
Arid1a	3.13749e-107	-0.27265	0.535	0.448	9.74284e-103	Lum-A
Cyth2	3.25276e-107	-0.295609	0.454	0.436	1.01008e-102	Lum-A
Zmym5	4.28367e-107	-0.3203	0.49	0.439	1.33021e-102	Lum-A
Cd59a	4.754e-107	-0.592315	0.525	0.273	1.47626e-102	Lum-A
Clk1	6.85767e-107	-0.480671	0.828	0.773	2.12951e-102	Lum-A
Klf4	8.21258e-107	-0.826905	0.653	0.714	2.55025e-102	Lum-A
Ndufb11	8.22744e-107	-0.377445	0.976	0.925	2.55487e-102	Lum-A
Jmjd1c	1.78293e-106	-0.406808	0.543	0.512	5.53652e-102	Lum-A
Taf15	2.45377e-106	-0.277097	0.572	0.469	7.61971e-102	Lum-A
Dapk1	2.9193e-106	-0.470889	0.296	0.492	9.06531e-102	Lum-A
Zbtb11	3.29295e-106	-0.292643	0.546	0.436	1.02256e-101	Lum-A
Pltp	3.43594e-106	-0.685659	0.015	0.408	1.06696e-101	Lum-A
Rbms1	3.82603e-106	-0.509729	0.238	0.457	1.1881e-101	Lum-A
Mafg	4.57501e-106	-0.287319	0.501	0.426	1.42068e-101	Lum-A
Thra	5.83783e-106	-0.283878	0.457	0.395	1.81282e-101	Lum-A
Col18a1	9.19506e-106	-0.747603	0.031	0.424	2.85534e-101	Lum-A
Midn	9.34925e-106	-0.50881	0.374	0.513	2.90322e-101	Lum-A
Rnf111	1.08542e-105	-0.310681	0.477	0.447	3.37054e-101	Lum-A
Camk1	1.16376e-105	-0.300783	0.419	0.402	3.61381e-101	Lum-A
Utrn	1.31408e-105	-0.540979	0.125	0.493	4.08062e-101	Lum-A
Ing1	1.6722e-105	-0.317933	0.492	0.424	5.19269e-101	Lum-A
Bnip2	2.19649e-105	-0.516435	0.212	0.455	6.82077e-101	Lum-A
Ccnd1	2.46834e-105	-0.76853	0.074	0.47	7.66494e-101	Lum-A
Kdm2a	3.78754e-105	-0.282072	0.517	0.441	1.17614e-100	Lum-A
Zc3h13	9.23677e-105	-0.329363	0.515	0.465	2.8683e-100	Lum-A
Cbx4	1.01098e-104	-0.314589	0.532	0.435	3.1394e-100	Lum-A
Sertad2	1.10884e-104	-0.45186	0.365	0.497	3.44327e-100	Lum-A
Ryk	1.19458e-104	-0.337503	0.454	0.458	3.70953e-100	Lum-A
Bcam	1.25444e-104	-0.63935	0.036	0.425	3.8954e-100	Lum-A
Ttc19	1.50531e-104	-0.258365	0.459	0.38	4.67445e-100	Lum-A
Paxbp1	1.76523e-104	-0.31551	0.445	0.411	5.48157e-100	Lum-A
Cav2	2.13448e-104	-0.500647	0.142	0.485	6.6282e-100	Lum-A
Hmgn3	2.56252e-104	-0.433302	0.523	0.563	7.95738e-100	Lum-A
Rsu1	3.48471e-104	-0.340542	0.328	0.425	1.08211e-99	Lum-A
Epb41l4aos	3.66067e-104	-0.310294	0.486	0.455	1.13675e-99	Lum-A
Fam208a	3.77975e-104	-0.375841	0.472	0.48	1.17373e-99	Lum-A
Snhg12	3.83008e-104	-0.296732	0.561	0.462	1.18935e-99	Lum-A
Birc2	4.1259e-104	-0.352311	0.492	0.44	1.28122e-99	Lum-A
U2af2	4.68118e-104	-0.306898	0.515	0.461	1.45365e-99	Lum-A
Rbmxl1	7.26292e-104	-0.275366	0.446	0.411	2.25535e-99	Lum-A
Ptpn2	8.82252e-104	-0.297512	0.45	0.417	2.73966e-99	Lum-A
Add1	1.05414e-103	-0.271392	0.43	0.402	3.27341e-99	Lum-A
Crk	1.50397e-103	-0.258004	0.49	0.426	4.67029e-99	Lum-A
Cdv3	1.66631e-103	-0.334793	0.94	0.803	5.17439e-99	Lum-A
Igf1r	1.90016e-103	-0.445492	0.372	0.513	5.90058e-99	Lum-A
Klf3	1.91885e-103	-0.408377	0.532	0.48	5.95861e-99	Lum-A
Shoc2	2.06723e-103	-0.344734	0.465	0.466	6.41938e-99	Lum-A
Eef1g	2.31402e-103	-0.435369	0.991	0.961	7.18571e-99	Lum-A
Smg6	4.48227e-103	-0.309124	0.51	0.45	1.39188e-98	Lum-A
Cox5b	4.93311e-103	-0.312149	0.976	0.89	1.53188e-98	Lum-A
Ppid	6.05441e-103	-0.376941	0.405	0.461	1.88007e-98	Lum-A
Sdc4	9.72356e-103	-0.602717	0.922	0.853	3.01946e-98	Lum-A
Cebpg	1.27892e-102	-0.336138	0.441	0.451	3.97144e-98	Lum-A
Prss23	1.39837e-102	-0.610637	0.024	0.416	4.34236e-98	Lum-A
Phip	2.01945e-102	-0.518222	0.343	0.53	6.27099e-98	Lum-A
Plp2	2.54168e-102	-0.39684	0.363	0.468	7.89269e-98	Lum-A
Ndufb10	2.69497e-102	-0.296311	0.973	0.863	8.36869e-98	Lum-A
Nras	2.96103e-102	-0.265548	0.459	0.392	9.19489e-98	Lum-A
Kin	3.20055e-102	-0.280311	0.474	0.419	9.93867e-98	Lum-A
Ppp2r5a	3.83354e-102	-0.394047	0.372	0.47	1.19043e-97	Lum-A
Mt1	3.93805e-102	-1.27046	0.985	0.957	1.22288e-97	Lum-A
Sparc	4.20028e-102	-0.877939	0.027	0.401	1.30431e-97	Lum-A
Itgb4	4.79859e-102	-0.507331	0.16	0.434	1.49011e-97	Lum-A
Mtus1	4.94141e-102	-0.279901	0.474	0.385	1.53445e-97	Lum-A
Tpp2	1.03952e-101	-0.307738	0.466	0.432	3.22802e-97	Lum-A
Ilf2	1.044e-101	-0.317587	0.446	0.449	3.24195e-97	Lum-A
Peli1	1.16897e-101	-0.296585	0.479	0.422	3.63e-97	Lum-A
Unc45a	1.19801e-101	-0.370043	0.425	0.43	3.72017e-97	Lum-A
Dlk2	2.01823e-101	-0.691223	0.009	0.393	6.26721e-97	Lum-A
Gapvd1	2.37943e-101	-0.256604	0.495	0.411	7.38885e-97	Lum-A
Eif5a	4.69318e-101	-0.465781	0.985	0.951	1.45737e-96	Lum-A
Pnp	4.82393e-101	-0.462838	0.363	0.479	1.49797e-96	Lum-A
Tnfaip8	5.9436e-101	-0.613605	0.083	0.438	1.84567e-96	Lum-A
Rabac1	6.88743e-101	-0.448568	0.978	0.919	2.13875e-96	Lum-A
Gadd45a	7.03125e-101	-0.320754	0.575	0.384	2.18341e-96	Lum-A
Nrtn	8.34887e-101	-0.613725	0.272	0.482	2.59257e-96	Lum-A
Slc2a1	9.00457e-101	-0.433328	0.434	0.456	2.79619e-96	Lum-A
Epc2	1.26372e-100	-0.284612	0.483	0.422	3.92424e-96	Lum-A
Ubr5	1.61459e-100	-0.304105	0.446	0.418	5.01379e-96	Lum-A
Zzz3	1.76308e-100	-0.33604	0.419	0.428	5.4749e-96	Lum-A
Ptprd	1.89792e-100	-0.546414	0.163	0.425	5.89362e-96	Lum-A
Sox4	2.15005e-100	-0.796882	0.08	0.47	6.67656e-96	Lum-A
Thbs1	3.70191e-100	-1.05831	0.064	0.447	1.14955e-95	Lum-A
Uqcr10	4.23188e-100	-0.41837	0.98	0.932	1.31413e-95	Lum-A
Rybp	4.65635e-100	-0.339614	0.365	0.417	1.44594e-95	Lum-A
Hnrnph3	6.22098e-100	-0.350058	0.425	0.448	1.9318e-95	Lum-A
Atxn1	6.97072e-100	-0.29446	0.468	0.425	2.16462e-95	Lum-A
Baz1a	1.06732e-99	-0.399301	0.446	0.421	3.31433e-95	Lum-A
Lamc2	1.08889e-99	-0.34238	0.535	0.443	3.38134e-95	Lum-A
Lamp1	1.17071e-99	-0.362211	0.978	0.892	3.6354e-95	Lum-A
Tjp1	1.9437e-99	-0.318381	0.434	0.424	6.03576e-95	Lum-A
Map7	2.04452e-99	-0.28034	0.466	0.405	6.34885e-95	Lum-A
Ltbp4	3.8304e-99	-0.569091	0.024	0.399	1.18945e-94	Lum-A
Pkp3	4.16573e-99	-0.386858	0.412	0.453	1.29358e-94	Lum-A
Appbp2	4.17721e-99	-0.278539	0.503	0.432	1.29715e-94	Lum-A
Gls	8.04541e-99	-0.42554	0.465	0.495	2.49834e-94	Lum-A
Frmd4b	8.32505e-99	-0.331903	0.508	0.446	2.58518e-94	Lum-A
Chd2	9.97753e-99	-0.289825	0.579	0.461	3.09832e-94	Lum-A
Smg1	1.0403e-98	-0.306067	0.485	0.439	3.23044e-94	Lum-A
Ssbp2	1.04317e-98	-0.292569	0.314	0.312	3.23936e-94	Lum-A
Srrt	1.89815e-98	-0.264608	0.454	0.384	5.89432e-94	Lum-A
Skil	2.23695e-98	-0.455608	0.436	0.484	6.94641e-94	Lum-A
Scgb1b27	3.39586e-98	1.56326	0.298	0.019	1.05452e-93	Lum-A
Fcho2	3.43507e-98	-0.290882	0.452	0.422	1.06669e-93	Lum-A
Pdpn	4.82456e-98	-0.61655	0.009	0.382	1.49817e-93	Lum-A
Abhd2	4.95268e-98	-0.42865	0.426	0.458	1.53796e-93	Lum-A
Morf4l1	6.82187e-98	-0.359975	0.984	0.917	2.11839e-93	Lum-A
Cdkn1a	6.95859e-98	-0.921895	0.47	0.606	2.16085e-93	Lum-A
Hmgn2	7.67326e-98	-0.286232	0.432	0.396	2.38278e-93	Lum-A
Zcchc11	1.03318e-97	-0.289694	0.495	0.424	3.20834e-93	Lum-A
Cyr61	1.87339e-97	-1.14836	0.624	0.653	5.81745e-93	Lum-A
Ythdf2	1.88765e-97	-0.299928	0.408	0.406	5.86171e-93	Lum-A
Il6st	2.43375e-97	-0.390572	0.328	0.403	7.55752e-93	Lum-A
Mknk2	4.12447e-97	-0.369963	0.414	0.482	1.28077e-92	Lum-A
Gatad2b	6.1186e-97	-0.250188	0.463	0.392	1.90001e-92	Lum-A
Nek7	9.01719e-97	-0.265726	0.512	0.406	2.80011e-92	Lum-A
Arl5b	1.00755e-96	-0.340569	0.485	0.418	3.12874e-92	Lum-A
Mob1a	1.01357e-96	-0.280515	0.434	0.414	3.14743e-92	Lum-A
Rsbn1	1.30226e-96	-0.267785	0.481	0.419	4.0439e-92	Lum-A
Vasp	1.33389e-96	-0.284697	0.45	0.404	4.14214e-92	Lum-A
Nab1	1.45841e-96	-0.391793	0.356	0.439	4.52879e-92	Lum-A
Arl4a	1.90587e-96	-0.431988	0.746	0.588	5.9183e-92	Lum-A
Rest	5.79858e-96	-0.287123	0.441	0.41	1.80063e-91	Lum-A
Krt17	8.43998e-96	-1.59664	0.058	0.422	2.62087e-91	Lum-A
Ppp4r3a	9.29503e-96	-0.28991	0.446	0.41	2.88639e-91	Lum-A
Arf1	1.01538e-95	-0.310203	0.971	0.876	3.15305e-91	Lum-A
Fgfr2	1.19673e-95	-0.521405	0.067	0.421	3.71621e-91	Lum-A
Edf1	2.89017e-95	-0.360959	0.975	0.905	8.97485e-91	Lum-A
Ensa	3.30538e-95	-0.250647	0.454	0.386	1.02642e-90	Lum-A
Eif3m	7.29085e-95	-0.262417	0.969	0.846	2.26403e-90	Lum-A
Rere	1.29858e-94	-0.265221	0.512	0.44	4.03247e-90	Lum-A
Cfl2	1.52267e-94	-0.348209	0.485	0.457	4.72836e-90	Lum-A
Ier2	1.98005e-94	-0.812257	0.913	0.912	6.14866e-90	Lum-A
Ethe1	2.14534e-94	-0.322486	0.383	0.395	6.66192e-90	Lum-A
Sprr1a	5.11044e-94	-2.03551	0.216	0.44	1.58694e-89	Lum-A
Brwd1	5.98497e-94	-0.266578	0.539	0.414	1.85851e-89	Lum-A
Kcnq1ot1	8.25743e-94	-0.603904	0.78	0.685	2.56418e-89	Lum-A
Rapgef6	1.21714e-93	-0.284906	0.417	0.393	3.77959e-89	Lum-A
Bag3	1.27543e-93	-0.477813	0.289	0.469	3.96058e-89	Lum-A
Fosl1	1.832e-93	-0.637342	0.031	0.398	5.68891e-89	Lum-A
Lncpint	2.47526e-93	-0.331017	0.416	0.377	7.68641e-89	Lum-A
Gt(ROSA)26Sor	3.84475e-93	-0.271836	0.481	0.361	1.19391e-88	Lum-A
Kpnb1	5.34973e-93	-0.250108	0.45	0.379	1.66125e-88	Lum-A
Pik3c2a	6.42596e-93	-0.262757	0.412	0.373	1.99545e-88	Lum-A
Cyp2f2	8.85305e-93	-1.01221	0.298	0.485	2.74914e-88	Lum-A
Sipa1l1	1.10645e-92	-0.348742	0.381	0.446	3.43586e-88	Lum-A
Gm20186	1.36738e-92	-0.709559	0.359	0.471	4.24612e-88	Lum-A
Tubb2a	1.83551e-92	-0.49996	0.363	0.486	5.69982e-88	Lum-A
Mast4	2.00877e-92	-0.619517	0.303	0.499	6.23784e-88	Lum-A
Tead1	2.47369e-92	-0.377176	0.314	0.368	7.68155e-88	Lum-A
Eps8l2	2.63202e-92	-0.37819	0.339	0.449	8.1732e-88	Lum-A
Lsm5	3.62233e-92	-0.262689	0.407	0.387	1.12484e-87	Lum-A
Efhd2	3.65377e-92	-0.450055	0.367	0.489	1.13461e-87	Lum-A
Crebzf	4.91425e-92	-0.287748	0.49	0.424	1.52602e-87	Lum-A
Itgav	5.70671e-92	-0.478216	0.283	0.468	1.7721e-87	Lum-A
Fmr1	6.63138e-92	-0.360133	0.336	0.432	2.05924e-87	Lum-A
Flna	8.38017e-92	-0.515011	0.058	0.395	2.6023e-87	Lum-A
Crim1	1.28353e-91	-0.498702	0.06	0.427	3.98575e-87	Lum-A
Nfkb1	1.53982e-91	-0.433069	0.436	0.444	4.7816e-87	Lum-A
Slc6a6	3.2829e-91	-0.442917	0.24	0.37	1.01944e-86	Lum-A
Gapdh	3.96568e-91	-0.411406	0.973	0.925	1.23146e-86	Lum-A
Zfp703	5.05983e-91	-0.283469	0.47	0.371	1.57123e-86	Lum-A
Srp14	5.2964e-91	-0.311493	0.984	0.853	1.64469e-86	Lum-A
Rbms3	7.18e-91	-0.466339	0.024	0.381	2.2296e-86	Lum-A
F2rl1	8.8637e-91	-0.33743	0.327	0.363	2.75244e-86	Lum-A
Cep164	9.04843e-91	-0.324199	0.325	0.396	2.80981e-86	Lum-A
Tnfrsf1a	9.73522e-91	-0.343854	0.334	0.406	3.02308e-86	Lum-A
Fhl2	1.08136e-90	-0.619269	0.036	0.398	3.35796e-86	Lum-A
Minos1	1.48949e-90	-0.3116	0.966	0.849	4.62531e-86	Lum-A
Fosl2	1.57218e-90	-0.322514	0.519	0.447	4.8821e-86	Lum-A
Phpt1	2.21354e-90	-0.263888	0.475	0.39	6.87372e-86	Lum-A
Spon2	3.75046e-90	-0.920634	0.031	0.376	1.16463e-85	Lum-A
Fryl	3.87122e-90	-0.269592	0.383	0.361	1.20213e-85	Lum-A
Camk2n1	4.20283e-90	-0.478088	0.071	0.412	1.30511e-85	Lum-A
Zfp800	4.95089e-90	-0.270516	0.377	0.369	1.5374e-85	Lum-A
Tgfbr3	5.95776e-90	-0.409238	0.292	0.438	1.85006e-85	Lum-A
Ndufa7	6.74e-90	-0.387414	0.98	0.938	2.09297e-85	Lum-A
Psmb1	1.07753e-89	-0.333911	0.982	0.926	3.34607e-85	Lum-A
Zfp704	1.7396e-89	-0.45082	0.18	0.465	5.40198e-85	Lum-A
Srf	2.0285e-89	-0.379584	0.343	0.417	6.2991e-85	Lum-A
Map2k4	2.40101e-89	-0.251815	0.397	0.34	7.45584e-85	Lum-A
Mybbp1a	3.34454e-89	-0.27244	0.419	0.393	1.03858e-84	Lum-A
Zmiz1	4.37399e-89	-0.265131	0.443	0.396	1.35826e-84	Lum-A
Actn1	5.04412e-89	-0.287072	0.39	0.381	1.56635e-84	Lum-A
Rbm27	5.61987e-89	-0.272326	0.436	0.392	1.74514e-84	Lum-A
Sord	6.95615e-89	-0.440211	0.247	0.419	2.16009e-84	Lum-A
Rrs1	7.07516e-89	-0.282015	0.437	0.379	2.19705e-84	Lum-A
Nampt	7.41806e-89	-0.361935	0.37	0.425	2.30353e-84	Lum-A
Ilk	8.65192e-89	-0.277327	0.377	0.379	2.68668e-84	Lum-A
Brd3	9.51147e-89	-0.256147	0.43	0.377	2.9536e-84	Lum-A
Nptn	1.19694e-88	-0.351341	0.332	0.428	3.71687e-84	Lum-A
Nfyb	1.42128e-88	-0.272081	0.405	0.364	4.4135e-84	Lum-A
Cnn2	1.42418e-88	-0.518485	0.045	0.386	4.4225e-84	Lum-A
Uqcr11	1.99757e-88	-0.387892	0.976	0.927	6.20306e-84	Lum-A
Vegfb	2.11513e-88	-0.275236	0.394	0.394	6.56813e-84	Lum-A
4930523C07Rik	2.32735e-88	-0.469022	0.044	0.392	7.22711e-84	Lum-A
Wdfy1	5.75723e-88	-0.294855	0.347	0.384	1.78779e-83	Lum-A
Txnip	8.41149e-88	-0.478427	0.646	0.418	2.61202e-83	Lum-A
Rela	8.51895e-88	-0.291508	0.358	0.38	2.64539e-83	Lum-A
Tcf7l2	1.0601e-87	-0.334961	0.358	0.411	3.29194e-83	Lum-A
Sik1	1.17877e-87	-0.490061	0.192	0.431	3.66045e-83	Lum-A
Maf	1.27477e-87	-0.565833	0.018	0.361	3.95854e-83	Lum-A
Cwc25	1.71375e-87	-0.261491	0.407	0.373	5.32169e-83	Lum-A
Ndrg2	2.68267e-87	-0.516427	0.198	0.396	8.33048e-83	Lum-A
Irf2bpl	2.68927e-87	-0.347666	0.367	0.41	8.35098e-83	Lum-A
Ehf	3.45664e-87	-0.263597	0.949	0.699	1.07339e-82	Lum-A
Cpne8	3.97404e-87	-0.453056	0.034	0.382	1.23406e-82	Lum-A
Ano1	1.06924e-86	-0.433755	0.396	0.443	3.32031e-82	Lum-A
Mga	1.24342e-86	-0.324277	0.379	0.413	3.86118e-82	Lum-A
Sptan1	2.05047e-86	-0.359457	0.434	0.445	6.36733e-82	Lum-A
Tle1	2.17324e-86	-0.36705	0.307	0.431	6.74855e-82	Lum-A
Rap2b	2.22641e-86	-0.685085	0.152	0.431	6.91367e-82	Lum-A
Rnd3	3.10523e-86	-0.579555	0.031	0.373	9.64268e-82	Lum-A
Krt8	3.17772e-86	-0.925222	0.975	0.947	9.86776e-82	Lum-A
S100a13	3.2304e-86	-0.46706	0.281	0.451	1.00314e-81	Lum-A
Stmn1	3.95881e-86	-0.637215	0.132	0.475	1.22933e-81	Lum-A
Rasa1	3.99644e-86	-0.273479	0.403	0.383	1.24102e-81	Lum-A
Nfkbia	6.7558e-86	-0.821423	0.746	0.815	2.09788e-81	Lum-A
Rab20	6.83144e-86	-0.288738	0.397	0.354	2.12137e-81	Lum-A
Bex1	9.57825e-86	-0.410701	0.399	0.267	2.97433e-81	Lum-A
Nbl1	1.13891e-85	-0.442126	0.254	0.449	3.53667e-81	Lum-A
Mdm4	1.23575e-85	-0.259831	0.379	0.362	3.83737e-81	Lum-A
Ifi27	1.36664e-85	0.439906	0.891	0.468	4.24383e-81	Lum-A
Smc5	1.47844e-85	-0.297598	0.394	0.38	4.59099e-81	Lum-A
Trp63	1.48447e-85	-0.506437	0.002	0.328	4.60973e-81	Lum-A
Acaa2	1.54001e-85	0.423812	0.96	0.651	4.7822e-81	Lum-A
Ndufa2	2.32772e-85	-0.339851	0.967	0.898	7.22827e-81	Lum-A
Prdx2	7.3049e-85	-0.308299	0.971	0.897	2.26839e-80	Lum-A
Dido1	8.26806e-85	-0.251497	0.381	0.344	2.56748e-80	Lum-A
Bcl2l14	9.70926e-85	-0.334111	0.376	0.249	3.01502e-80	Lum-A
Nup98	1.31148e-84	-0.254231	0.419	0.371	4.07254e-80	Lum-A
Trib1	2.33821e-84	-0.490755	0.537	0.531	7.26083e-80	Lum-A
Lactb	4.11512e-84	-0.320594	0.407	0.381	1.27787e-79	Lum-A
Hexim1	4.20039e-84	-0.412145	0.465	0.435	1.30435e-79	Lum-A
Phlda3	4.43324e-84	-0.596996	0.241	0.437	1.37665e-79	Lum-A
Rin2	4.77449e-84	-0.272774	0.377	0.361	1.48262e-79	Lum-A
Iws1	5.10355e-84	-0.29	0.348	0.372	1.58481e-79	Lum-A
Ep400	7.03125e-84	-0.25795	0.454	0.403	2.18341e-79	Lum-A
mt-Nd1	7.10201e-84	-0.460686	0.973	0.993	2.20539e-79	Lum-A
Xiap	1.54788e-83	-0.260971	0.336	0.36	4.80665e-79	Lum-A
Itpr1	2.71136e-83	-0.458904	0.111	0.417	8.41959e-79	Lum-A
Zyx	2.91601e-83	-0.453512	0.191	0.433	9.05507e-79	Lum-A
Arid1b	4.65642e-83	-0.263118	0.425	0.404	1.44596e-78	Lum-A
Agrn	4.91492e-83	-0.457781	0.094	0.389	1.52623e-78	Lum-A
Fabp5	5.24422e-83	-0.658358	0.675	0.579	1.62849e-78	Lum-A
Acsl3	6.28601e-83	-0.504754	0.492	0.48	1.95199e-78	Lum-A
Lims1	1.44541e-82	-0.271543	0.309	0.368	4.48842e-78	Lum-A
Tns3	1.98613e-82	-0.421523	0.089	0.385	6.16754e-78	Lum-A
Tuft1	2.05919e-82	-0.362551	0.327	0.396	6.3944e-78	Lum-A
Tacstd2	2.47842e-82	-0.681928	0.425	0.446	7.69625e-78	Lum-A
Ppfibp1	2.76632e-82	-0.482301	0.16	0.431	8.59027e-78	Lum-A
Trim24	2.78425e-82	-0.263671	0.392	0.368	8.64594e-78	Lum-A
Krit1	3.08524e-82	-0.261298	0.381	0.355	9.5806e-78	Lum-A
Alas1	3.14608e-82	-0.378012	0.367	0.412	9.76953e-78	Lum-A
Setbp1	4.42856e-82	-0.38342	0.281	0.416	1.3752e-77	Lum-A
Fam107b	4.60582e-82	-0.722858	0.238	0.453	1.43025e-77	Lum-A
Irx2	4.77834e-82	-0.282387	0.385	0.349	1.48382e-77	Lum-A
Hspb8	4.88627e-82	-0.26023	0.348	0.299	1.51733e-77	Lum-A
Sar1b	5.40586e-82	0.28589	0.966	0.601	1.67868e-77	Lum-A
Gm10076	6.58461e-82	-0.267384	0.8	0.626	2.04472e-77	Lum-A
Usp25	9.00776e-82	-0.343664	0.296	0.413	2.79718e-77	Lum-A
Zc3h18	9.97058e-82	-0.265734	0.397	0.361	3.09616e-77	Lum-A
Anxa4	1.1097e-81	-0.284875	0.951	0.742	3.44595e-77	Lum-A
Tnfaip1	1.146e-81	-0.37695	0.247	0.421	3.55868e-77	Lum-A
Icam1	1.40906e-81	-0.673375	0.044	0.365	4.37557e-77	Lum-A
Myc	1.53682e-81	-0.535256	0.37	0.478	4.77227e-77	Lum-A
Slc39a8	1.89332e-81	-0.25458	0.41	0.276	5.87933e-77	Lum-A
Hmgcs1	2.14568e-81	-0.532131	0.163	0.426	6.66298e-77	Lum-A
Arl4c	2.27952e-81	-0.478824	0.013	0.343	7.07859e-77	Lum-A
Phlda1	2.50758e-81	-0.450201	0.873	0.746	7.78678e-77	Lum-A
Nr3c1	4.22219e-81	-0.386336	0.289	0.419	1.31112e-76	Lum-A
Topors	7.05636e-81	-0.278081	0.501	0.408	2.19121e-76	Lum-A
Ubc	7.79869e-81	-0.855475	0.975	0.956	2.42173e-76	Lum-A
Adgrb1	7.98081e-81	-0.491602	0.025	0.343	2.47828e-76	Lum-A
Zfp503	1.21969e-80	-0.348213	0.412	0.408	3.78749e-76	Lum-A
Magi3	1.51196e-80	-0.251624	0.368	0.346	4.69509e-76	Lum-A
Qk	1.56582e-80	-0.422931	0.183	0.41	4.86235e-76	Lum-A
Cish	2.0736e-80	-0.401803	0.249	0.382	6.43914e-76	Lum-A
Hsph1	2.4262e-80	-0.356898	0.423	0.385	7.53408e-76	Lum-A
Lamb3	3.30997e-80	-0.476243	0.015	0.332	1.02785e-75	Lum-A
Frmd6	3.44733e-80	-0.462371	0.147	0.403	1.0705e-75	Lum-A
Rexo1	8.49554e-80	-0.262712	0.385	0.369	2.63812e-75	Lum-A
F3	9.55421e-80	-0.684465	0.024	0.356	2.96687e-75	Lum-A
Ephx1	1.86361e-79	-0.257696	0.456	0.413	5.78708e-75	Lum-A
Tmbim1	2.29047e-79	-0.303524	0.339	0.392	7.11259e-75	Lum-A
Vamp8	3.03637e-79	-0.273518	0.989	0.891	9.42884e-75	Lum-A
Ctbp2	1.10626e-78	-0.3574	0.276	0.417	3.43526e-74	Lum-A
Slco2a1	2.34962e-78	-0.47652	0.011	0.325	7.29629e-74	Lum-A
Net1	3.53651e-78	-0.442132	0.165	0.39	1.09819e-73	Lum-A
Pxn	3.77782e-78	-0.367535	0.25	0.403	1.17313e-73	Lum-A
Col17a1	8.55912e-78	-0.454114	0.013	0.317	2.65786e-73	Lum-A
Ddah2	1.41246e-77	-0.369411	0.243	0.383	4.3861e-73	Lum-A
Yap1	1.59876e-77	-0.258803	0.381	0.354	4.96463e-73	Lum-A
Col16a1	1.77395e-77	-0.439947	0.018	0.321	5.50865e-73	Lum-A
Ldha	1.98056e-77	-0.305803	0.949	0.838	6.15024e-73	Lum-A
Nectin1	3.5151e-77	-0.454515	0.06	0.352	1.09154e-72	Lum-A
Gm1673	3.63074e-77	-0.489113	0.011	0.317	1.12745e-72	Lum-A
Ifrd1	4.18625e-77	-0.713251	0.806	0.783	1.29996e-72	Lum-A
Tmed2	5.14715e-77	-0.258774	0.98	0.869	1.59835e-72	Lum-A
Cpe	8.4707e-77	-0.573648	0.016	0.321	2.63041e-72	Lum-A
Adh1	9.11291e-77	-0.302935	0.414	0.384	2.82983e-72	Lum-A
Rel	9.88036e-77	-0.456204	0.258	0.405	3.06815e-72	Lum-A
2810403A07Rik	1.87061e-76	-0.284036	0.314	0.362	5.8088e-72	Lum-A
Map4k4	1.96194e-76	-0.393201	0.029	0.344	6.09242e-72	Lum-A
Ski	2.0538e-76	-0.352625	0.234	0.381	6.37767e-72	Lum-A
Scand1	2.28999e-76	-0.279558	0.978	0.871	7.11111e-72	Lum-A
Golim4	4.23935e-76	-0.251822	0.376	0.328	1.31644e-71	Lum-A
Pcbd1	4.25767e-76	-0.299639	0.31	0.403	1.32214e-71	Lum-A
Slc25a5	5.43583e-76	-0.447899	0.978	0.927	1.68799e-71	Lum-A
Ly6a	6.81872e-76	-1.16821	0.256	0.514	2.11742e-71	Lum-A
Cd55	7.55453e-76	-0.309656	0.381	0.263	2.34591e-71	Lum-A
Swi5	9.4541e-76	-0.252129	0.982	0.889	2.93578e-71	Lum-A
Tmem65	1.49132e-75	-0.253673	0.321	0.338	4.63101e-71	Lum-A
Gadd45b	1.76026e-75	-0.75077	0.481	0.509	5.46613e-71	Lum-A
Adm	3.17782e-75	-0.698379	0.047	0.363	9.86808e-71	Lum-A
Arap2	3.26756e-75	-0.297531	0.309	0.37	1.01468e-70	Lum-A
Rflnb	7.16293e-75	-0.518915	0.06	0.37	2.2243e-70	Lum-A
Il33	9.03221e-75	-0.502676	0.004	0.299	2.80477e-70	Lum-A
Prelp	9.52577e-75	-0.466758	0.004	0.298	2.95804e-70	Lum-A
Lgals7	9.88576e-75	-1.17805	0.038	0.33	3.06983e-70	Lum-A
Cers5	1.03748e-74	-0.308465	0.221	0.337	3.22168e-70	Lum-A
Tnrc18	1.60535e-74	-0.276073	0.272	0.331	4.9851e-70	Lum-A
Hspa1b	1.73684e-74	-0.751146	0.639	0.657	5.3934e-70	Lum-A
Cxcl16	1.98748e-74	-0.314277	0.347	0.356	6.17172e-70	Lum-A
Nav2	2.76064e-74	-0.382247	0.178	0.39	8.57261e-70	Lum-A
Ifngr1	4.00213e-74	-0.308583	0.249	0.374	1.24278e-69	Lum-A
Cacna2d1	4.82409e-74	-0.401178	0.009	0.303	1.49803e-69	Lum-A
Coro2a	7.38031e-74	-0.278735	0.354	0.378	2.29181e-69	Lum-A
Ssr4	9.63371e-74	0.327115	0.996	0.897	2.99156e-69	Lum-A
Neat1	9.7042e-74	-0.583669	0.9	0.851	3.01345e-69	Lum-A
Svil	9.98845e-74	-0.343572	0.245	0.354	3.10171e-69	Lum-A
Rab12	1.73732e-73	-0.312112	0.207	0.345	5.39491e-69	Lum-A
Tanc2	2.22176e-73	-0.337064	0.214	0.369	6.89923e-69	Lum-A
Setd2	2.36396e-73	-0.252539	0.374	0.359	7.34079e-69	Lum-A
Csnk1e	2.4083e-73	-0.276123	0.298	0.354	7.47849e-69	Lum-A
Larp7	2.87421e-73	-0.330484	0.287	0.381	8.92528e-69	Lum-A
Ubl5	3.38466e-73	-0.290553	0.989	0.918	1.05104e-68	Lum-A
Cdc42ep3	5.8037e-73	-0.32768	0.339	0.282	1.80222e-68	Lum-A
Sh2d4a	6.50218e-73	-0.28993	0.336	0.359	2.01912e-68	Lum-A
Jag2	1.58883e-72	-0.427778	0.022	0.314	4.93381e-68	Lum-A
Lgals3	1.9764e-72	-0.976046	0.456	0.343	6.13733e-68	Lum-A
Atp5f1	2.49624e-72	-0.268941	0.973	0.907	7.75157e-68	Lum-A
Plek2	3.31105e-72	-0.38562	0.163	0.37	1.02818e-67	Lum-A
Arl3	7.18829e-72	-0.295486	0.269	0.386	2.23218e-67	Lum-A
mt-Nd3	8.74038e-72	-0.401043	0.933	0.867	2.71415e-67	Lum-A
Dsg2	1.46558e-71	-0.273781	0.352	0.365	4.55108e-67	Lum-A
Aebp2	1.56357e-71	-0.349145	0.336	0.384	4.85534e-67	Lum-A
Esyt2	1.86498e-71	-0.267269	0.334	0.371	5.79133e-67	Lum-A
2810474O19Rik	2.80268e-71	-0.425582	0.221	0.391	8.70317e-67	Lum-A
Lars2	3.29782e-71	-0.38536	0.873	0.662	1.02407e-66	Lum-A
Auts2	3.69526e-71	-0.389142	0.203	0.336	1.14749e-66	Lum-A
Prkx	4.24656e-71	-0.360656	0.167	0.375	1.31868e-66	Lum-A
Cbs	5.19221e-71	-0.284792	0.316	0.33	1.61234e-66	Lum-A
Hspa1a	2.01779e-70	-1.09207	0.544	0.648	6.26584e-66	Lum-A
Herpud1	3.0263e-70	0.342901	0.978	0.694	9.39758e-66	Lum-A
Foxq1	5.29191e-70	-0.929531	0.189	0.446	1.6433e-65	Lum-A
Wee1	6.07993e-70	-0.29276	0.318	0.343	1.888e-65	Lum-A
Egr3	7.12964e-70	-0.578095	0.069	0.36	2.21397e-65	Lum-A
Hivep2	7.37284e-70	-0.339086	0.301	0.38	2.28949e-65	Lum-A
Mia	7.83044e-70	-0.511079	0.332	0.332	2.43159e-65	Lum-A
Calm1	8.8965e-70	-0.398227	0.993	0.973	2.76263e-65	Lum-A
Cmip	1.37405e-69	-0.266356	0.258	0.333	4.26683e-65	Lum-A
Tjp2	1.39576e-69	-0.295426	0.294	0.348	4.33424e-65	Lum-A
Tshz1	1.71743e-69	-0.341699	0.162	0.368	5.33313e-65	Lum-A
Car8	3.54585e-69	-0.490674	0.171	0.378	1.10109e-64	Lum-A
Rbbp8	7.62596e-69	-0.358486	0.152	0.365	2.36809e-64	Lum-A
Igfbp7	1.01096e-68	-0.610283	0.049	0.351	3.13933e-64	Lum-A
9930021J03Rik	1.01933e-68	-0.303756	0.321	0.375	3.16532e-64	Lum-A
mt-Nd4	1.49968e-68	-0.369997	0.985	0.998	4.65697e-64	Lum-A
Gsto1	1.71537e-68	-0.481779	0.171	0.405	5.32674e-64	Lum-A
Spred2	5.99572e-68	-0.293622	0.192	0.317	1.86185e-63	Lum-A
Map1b	8.3963e-68	-0.44317	0.223	0.401	2.6073e-63	Lum-A
Nr4a2	1.36742e-67	-0.548383	0.314	0.413	4.24625e-63	Lum-A
Abcc3	4.85487e-67	-0.367627	0.181	0.361	1.50758e-62	Lum-A
Vangl1	6.18467e-67	-0.362445	0.044	0.319	1.92053e-62	Lum-A
Ahr	1.11068e-66	-0.401856	0.454	0.448	3.44901e-62	Lum-A
Serpinh1	1.39012e-66	-0.387572	0.016	0.29	4.31672e-62	Lum-A
Camk4	1.59456e-66	-0.374782	0.007	0.279	4.95157e-62	Lum-A
Crip1	1.83457e-66	-1.10849	0.201	0.448	5.69688e-62	Lum-A
Ptprs	4.16609e-66	-0.372576	0.091	0.329	1.2937e-61	Lum-A
Relb	4.46064e-66	-0.264615	0.22	0.301	1.38516e-61	Lum-A
Pmepa1	8.19314e-66	-0.710827	0.025	0.308	2.54422e-61	Lum-A
Phc2	8.71567e-66	-0.253236	0.296	0.334	2.70648e-61	Lum-A
Tceal9	1.11086e-65	-0.290875	0.971	0.851	3.44955e-61	Lum-A
Stk40	1.70136e-65	-0.334372	0.276	0.372	5.28324e-61	Lum-A
Tax1bp1	2.52587e-65	-0.373122	0.98	0.926	7.84359e-61	Lum-A
Ahctf1	3.47892e-65	-0.259816	0.234	0.319	1.08031e-60	Lum-A
Ncam1	3.71404e-65	-0.381939	0.011	0.28	1.15332e-60	Lum-A
Epha2	8.34473e-65	-0.333015	0.015	0.288	2.59129e-60	Lum-A
Pde4b	8.48207e-65	-0.477107	0.04	0.33	2.63394e-60	Lum-A
Hdgfl3	1.9908e-64	-0.333837	0.103	0.346	6.18202e-60	Lum-A
Uqcrq	2.02837e-64	-0.310048	0.978	0.902	6.29871e-60	Lum-A
Arc	3.28879e-64	-0.594242	0.06	0.333	1.02127e-59	Lum-A
Cox7b	3.95233e-64	-0.267149	0.984	0.901	1.22732e-59	Lum-A
Med13l	5.02819e-64	-0.253328	0.283	0.326	1.5614e-59	Lum-A
Ets1	5.65368e-64	-0.362363	0.004	0.263	1.75564e-59	Lum-A
Swap70	8.22155e-64	-0.333783	0.145	0.353	2.55304e-59	Lum-A
Cebpd	1.3929e-63	-0.803146	0.296	0.508	4.32537e-59	Lum-A
Bace2	1.71622e-63	-0.252793	0.365	0.28	5.32937e-59	Lum-A
Sema5a	3.33528e-63	-0.321332	0.009	0.279	1.0357e-58	Lum-A
Lor	5.24431e-63	-0.382635	0.007	0.267	1.62852e-58	Lum-A
Notch1	5.50006e-63	-0.322969	0.174	0.347	1.70793e-58	Lum-A
Arl13b	1.28701e-62	-0.359011	0.23	0.364	3.99655e-58	Lum-A
Rnf19a	1.39744e-62	-0.300935	0.218	0.334	4.33947e-58	Lum-A
Spry1	1.69528e-62	-0.357778	0.218	0.331	5.26437e-58	Lum-A
Tuba1a	2.29607e-62	-0.402611	0.053	0.317	7.12998e-58	Lum-A
Mepce	2.34294e-62	-0.254364	0.278	0.318	7.27554e-58	Lum-A
Ppl	2.3972e-62	-0.298395	0.201	0.312	7.44402e-58	Lum-A
Nkx3-1	3.27195e-62	-0.276517	0.341	0.218	1.01604e-57	Lum-A
Met	3.63369e-62	-0.335546	0.114	0.345	1.12837e-57	Lum-A
9530053A07Rik	5.98286e-62	-3.18846	0.595	0.411	1.85786e-57	Lum-A
Vps37b	9.22454e-62	-0.306602	0.265	0.322	2.8645e-57	Lum-A
Gm7714	9.87447e-62	1.4096	0.263	0.033	3.06632e-57	Lum-A
Socs2	1.36017e-61	-0.325097	0.047	0.309	4.22375e-57	Lum-A
Furin	1.59741e-61	-0.309604	0.209	0.346	4.96042e-57	Lum-A
Plk2	2.71416e-61	-0.455125	0.162	0.363	8.42827e-57	Lum-A
Col4a1	1.77365e-60	-0.443881	0.098	0.307	5.50772e-56	Lum-A
Pbsn	1.99209e-60	-2.67168	0.544	0.453	6.18604e-56	Lum-A
mt-Co3	2.6137e-60	-0.303011	0.998	0.998	8.11632e-56	Lum-A
Cdo1	2.63269e-60	-0.443578	0.134	0.364	8.1753e-56	Lum-A
Mecom	6.12789e-60	-0.337414	0.015	0.267	1.90289e-55	Lum-A
Igsf3	6.16928e-60	-0.33105	0.044	0.294	1.91575e-55	Lum-A
Cxcl14	6.65424e-60	-0.572961	0.013	0.272	2.06634e-55	Lum-A
Rab34	1.2125e-59	-0.28183	0.163	0.299	3.76519e-55	Lum-A
Apoc1	1.24304e-59	-1.13766	0.359	0.518	3.86e-55	Lum-A
Ccdc3	1.48639e-59	-0.305343	0.018	0.266	4.61569e-55	Lum-A
Gabarap	1.81399e-59	-0.294439	0.985	0.917	5.63298e-55	Lum-A
Ripk4	2.18012e-59	-0.267196	0.211	0.315	6.76992e-55	Lum-A
Sema3c	3.12826e-59	-0.346348	0.038	0.301	9.71418e-55	Lum-A
Fgf1	4.19712e-59	-0.304749	0.191	0.359	1.30333e-54	Lum-A
Ext1	1.057e-58	-0.308745	0.18	0.317	3.2823e-54	Lum-A
Rnase1	1.07923e-58	-1.57604	0.114	0.319	3.35134e-54	Lum-A
Tfap2c	1.35971e-58	-0.355689	0.047	0.294	4.22232e-54	Lum-A
Spred1	1.87667e-58	-0.307974	0.085	0.321	5.82762e-54	Lum-A
Sbno2	1.87824e-58	-0.333412	0.294	0.34	5.83251e-54	Lum-A
Dusp7	2.59211e-58	-0.392642	0.096	0.295	8.04927e-54	Lum-A
Vav3	2.87415e-58	-0.314939	0.113	0.271	8.92509e-54	Lum-A
Idh1	3.02023e-58	-0.307639	0.236	0.325	9.37873e-54	Lum-A
Utp14b	3.75645e-58	-0.33974	0.387	0.377	1.16649e-53	Lum-A
Rgs12	3.94803e-58	-0.344207	0.024	0.268	1.22598e-53	Lum-A
Dab2ip	4.08293e-58	-0.255712	0.211	0.32	1.26787e-53	Lum-A
Bmp7	4.48987e-58	-0.281355	0.154	0.302	1.39424e-53	Lum-A
Cavin1	8.28852e-58	-0.335364	0.136	0.329	2.57383e-53	Lum-A
Hspa2	8.31282e-58	-0.305211	0.29	0.297	2.58138e-53	Lum-A
Slc25a25	1.07891e-57	-0.295959	0.216	0.312	3.35035e-53	Lum-A
AC160336.1	1.24175e-57	-0.285056	0.499	0.352	3.85601e-53	Lum-A
Nab2	1.60942e-57	-0.312006	0.229	0.322	4.99774e-53	Lum-A
Hilpda	5.56254e-57	-0.399818	0.338	0.3	1.72733e-52	Lum-A
Mgat4b	6.16123e-57	-0.297893	0.074	0.317	1.91325e-52	Lum-A
Cd44	7.03797e-57	-0.395437	0.029	0.283	2.1855e-52	Lum-A
Fut8	8.77784e-57	-0.357339	0.08	0.335	2.72578e-52	Lum-A
Itga3	1.55647e-56	-0.31489	0.094	0.313	4.83329e-52	Lum-A
Lama5	2.81233e-55	-0.256505	0.178	0.299	8.73314e-51	Lum-A
Mex3c	3.49324e-55	-0.255631	0.201	0.289	1.08475e-50	Lum-A
Irs2	4.63383e-55	-0.350194	0.076	0.283	1.43894e-50	Lum-A
Tns1	6.06995e-55	-0.307915	0.024	0.265	1.8849e-50	Lum-A
Klf7	6.62588e-55	-0.295711	0.25	0.312	2.05754e-50	Lum-A
Aqp5	7.57974e-55	-0.293822	0.252	0.145	2.35374e-50	Lum-A
Adgrg6	9.4708e-55	-0.294297	0.078	0.319	2.94097e-50	Lum-A
Il6ra	1.05751e-54	-0.307512	0.058	0.283	3.28388e-50	Lum-A
mt-Nd4l	1.56043e-54	-0.36721	0.94	0.895	4.8456e-50	Lum-A
Chka	1.59317e-54	-0.457141	0.92	0.824	4.94726e-50	Lum-A
Cyba	5.43029e-54	-0.453506	0.176	0.387	1.68627e-49	Lum-A
Rarg	5.85334e-54	-0.298319	0.147	0.321	1.81764e-49	Lum-A
Trip6	1.24453e-53	-0.26143	0.025	0.252	3.86465e-49	Lum-A
Rpl41	2.07143e-53	-0.354649	1	0.998	6.43241e-49	Lum-A
Noct	1.00761e-52	-0.264483	0.243	0.257	3.12894e-48	Lum-A
Serpine2	2.6055e-52	-0.360546	0.024	0.257	8.09086e-48	Lum-A
Man2a2	3.16613e-52	-0.3162	0.098	0.285	9.83179e-48	Lum-A
Srd5a1	5.54367e-52	-0.373202	0.056	0.262	1.72148e-47	Lum-A
Emp1	8.65822e-52	-0.353373	0.024	0.255	2.68864e-47	Lum-A
Arl4d	2.04536e-51	-0.261735	0.252	0.256	6.35146e-47	Lum-A
Csrp2	4.30896e-51	-0.327956	0.149	0.314	1.33806e-46	Lum-A
Lpar6	4.67931e-51	-0.304738	0.142	0.282	1.45307e-46	Lum-A
Cdcp1	8.28665e-51	-0.255517	0.143	0.29	2.57325e-46	Lum-A
Cox7c	8.77837e-51	-0.299968	0.987	0.931	2.72595e-46	Lum-A
Id4	2.30564e-50	-0.325113	0.142	0.299	7.15969e-46	Lum-A
Gm26532	2.97499e-50	-0.405416	0.114	0.289	9.23823e-46	Lum-A
Rsrp1	6.37372e-50	-0.371362	0.944	0.898	1.97923e-45	Lum-A
mt-Co2	8.11167e-50	-0.304335	0.987	0.999	2.51892e-45	Lum-A
Npc2	1.93018e-49	0.250186	0.987	0.776	5.99378e-45	Lum-A
AY036118	2.55979e-49	-0.593415	0.828	0.743	7.9489e-45	Lum-A
Efnb2	3.27064e-49	-0.324413	0.078	0.312	1.01563e-44	Lum-A
Tgfb1	3.60187e-49	-0.250463	0.127	0.26	1.11849e-44	Lum-A
Atp1b1	5.5465e-49	-0.264386	0.982	0.856	1.72236e-44	Lum-A
Pim1	1.23998e-48	-0.291477	0.267	0.217	3.85052e-44	Lum-A
Arid5a	1.57144e-48	-0.275409	0.214	0.29	4.87981e-44	Lum-A
Itgb8	2.25355e-48	-0.262895	0.038	0.257	6.99796e-44	Lum-A
Sash1	2.35742e-48	-0.272216	0.098	0.294	7.32048e-44	Lum-A
Wwtr1	7.93289e-48	-0.267097	0.047	0.265	2.4634e-43	Lum-A
Upk1b	2.10686e-47	-0.474959	0.131	0.301	6.54245e-43	Lum-A
Stat5a	2.37877e-47	-0.272533	0.22	0.281	7.38678e-43	Lum-A
Mical3	4.61322e-47	-0.268523	0.136	0.281	1.43254e-42	Lum-A
Socs3	6.46235e-47	-0.497097	0.147	0.293	2.00675e-42	Lum-A
mt-Nd5	1.23409e-46	-0.390374	0.949	0.946	3.83223e-42	Lum-A
4631405K08Rik	1.31237e-46	-0.368061	0.062	0.251	4.0753e-42	Lum-A
Pdia3	1.59172e-46	-0.26537	0.984	0.887	4.94278e-42	Lum-A
Adamts1	2.01423e-46	-0.619303	0.129	0.307	6.2548e-42	Lum-A
Irx5	3.29029e-46	-0.271822	0.147	0.279	1.02173e-41	Lum-A
Pik3ip1	5.73184e-46	-0.293615	0.151	0.327	1.77991e-41	Lum-A
Lpcat2	8.79591e-46	-0.260855	0.103	0.274	2.73139e-41	Lum-A
Nr4a3	1.09532e-45	-0.35618	0.16	0.307	3.40131e-41	Lum-A
Ackr3	2.50666e-45	-0.300636	0.053	0.252	7.78394e-41	Lum-A
Bcl2	4.525e-45	-0.281869	0.076	0.263	1.40515e-40	Lum-A
Rdh10	5.28971e-45	-0.273443	0.113	0.276	1.64261e-40	Lum-A
Cldn8	1.05952e-44	-0.29157	0.143	0.279	3.29014e-40	Lum-A
Dusp1	1.28724e-44	-0.286537	0.623	0.486	3.99727e-40	Lum-A
Btg1	2.03105e-44	-0.324	0.96	0.91	6.30702e-40	Lum-A
mt-Atp6	2.19826e-44	-0.29381	0.996	0.998	6.82626e-40	Lum-A
Tgm4	8.69035e-44	-2.84583	0.419	0.387	2.69861e-39	Lum-A
S100a14	9.79964e-44	-0.462599	0.123	0.289	3.04308e-39	Lum-A
Dusp5	9.8095e-44	-0.294205	0.25	0.286	3.04615e-39	Lum-A
Gsta3	9.87454e-44	-0.52781	0.094	0.276	3.06634e-39	Lum-A
Atp5e	4.17873e-43	-0.300674	0.987	0.967	1.29762e-38	Lum-A
Egfr	2.59235e-42	-0.253696	0.065	0.264	8.05003e-38	Lum-A
Cdkn1c	4.21014e-42	-0.423704	0.138	0.286	1.30738e-37	Lum-A
Pebp1	5.54839e-41	-0.251844	0.984	0.933	1.72294e-36	Lum-A
Jun	1.20054e-40	-0.677232	0.887	0.922	3.72803e-36	Lum-A
Klf10	1.30209e-40	-0.277172	0.085	0.256	4.04338e-36	Lum-A
Hsp90b1	1.0022e-39	-0.51593	0.98	0.927	3.11212e-35	Lum-A
Fos	3.5914e-39	-0.843392	0.78	0.822	1.11524e-34	Lum-A
Mal	3.90794e-39	-0.372511	0.076	0.258	1.21353e-34	Lum-A
Msmb	7.53068e-39	-1.74468	0.47	0.243	2.3385e-34	Lum-A
Krt7	1.27709e-38	-0.520639	0.278	0.266	3.96574e-34	Lum-A
Ier5l	2.97795e-38	-0.337979	0.093	0.252	9.24743e-34	Lum-A
Ubb	6.05151e-37	-0.352536	1	0.995	1.87918e-32	Lum-A
Gm26917	3.28567e-36	-0.346477	0.624	0.432	1.0203e-31	Lum-A
Tcaf2	8.36309e-36	-0.379723	0.151	0.257	2.59699e-31	Lum-A
Serpinb1a	3.20741e-35	-0.378215	0.172	0.268	9.95996e-31	Lum-A
Gm12840	8.49179e-35	-0.414987	0.181	0.28	2.63696e-30	Lum-A
Calr	9.42961e-33	-0.284369	0.989	0.885	2.92818e-28	Lum-A
Atf3	4.76173e-32	-0.617468	0.871	0.907	1.47866e-27	Lum-A
Epcam	1.41527e-30	-0.444353	0.996	0.969	4.39484e-26	Lum-A
Krt18	1.08213e-28	-0.555111	0.995	0.975	3.36033e-24	Lum-A
Hspa5	1.13e-27	-0.451849	0.987	0.986	3.50899e-23	Lum-A
Gm42418	1.29435e-26	-0.619015	1	1	4.01934e-22	Lum-A
Pdia6	2.95237e-23	-0.299844	0.989	0.866	9.16799e-19	Lum-A
Wfdc2	2.22485e-22	-0.863879	0.232	0.315	6.90884e-18	Lum-A
Btg2	1.38944e-20	-0.407206	0.915	0.871	4.31463e-16	Lum-A
Prdx6	4.27645e-16	-0.906068	0.993	0.915	1.32797e-11	Lum-A
9530053A07Rik	0	4.94923	0.995	0.377	0	Lum-B
Tgm4	0	4.52452	0.997	0.325	0	Lum-B
Pbsn	0	3.6617	0.992	0.409	0	Lum-B
Gm5615	0	3.25698	0.992	0.117	0	Lum-B
Chn2	0	2.89178	0.974	0.079	0	Lum-B
C1rb	0	2.75993	0.947	0.039	0	Lum-B
Prdx6	0	2.71812	1	0.918	0	Lum-B
Gm37223	0	2.5651	0.907	0.038	0	Lum-B
Akr1b3	0	2.23501	0.976	0.554	0	Lum-B
Gsdma	0	2.1707	0.955	0.062	0	Lum-B
Pdia6	0	2.01026	0.979	0.874	0	Lum-B
Cd59a	0	2.00977	0.921	0.243	0	Lum-B
Dnajc10	0	1.93718	1	0.505	0	Lum-B
Man1a	0	1.81386	0.968	0.438	0	Lum-B
Fkbp11	0	1.72295	0.897	0.354	0	Lum-B
Glb1l3	0	1.65356	0.87	0.035	0	Lum-B
Hsp90b1	0	1.60484	0.984	0.929	0	Lum-B
Sdf2l1	0	1.59321	0.915	0.387	0	Lum-B
Tmed3	0	1.55381	0.944	0.745	0	Lum-B
Ssr4	0	1.51743	0.966	0.905	0	Lum-B
Atp6v1c2	0	1.50663	0.894	0.173	0	Lum-B
Manf	0	1.47956	0.952	0.753	0	Lum-B
Pgm2l1	0	1.47954	0.87	0.1	0	Lum-B
Dnajc3	0	1.47914	0.96	0.782	0	Lum-B
Pdia4	0	1.41846	0.91	0.551	0	Lum-B
Calr	0	1.37386	0.981	0.891	0	Lum-B
Sec61b	0	1.18753	0.955	0.913	0	Lum-B
Fkbp2	0	1.13934	0.952	0.807	0	Lum-B
Krtcap2	0	1.12811	0.939	0.846	0	Lum-B
Ift20	0	1.01909	0.96	0.816	0	Lum-B
Agr2	3.89817794568744e-321	2.19149	0.95	0.438	1.21050119747432e-316	Lum-B
[truncated: 6,070 more rows]
