# Supplementary figures and images for: RUNX1 marks a luminal castration-resistant lineage established at the onset of prostate development
Source: eLife journal article supplement (doi:10.7554/elife.60225), 2020-10-07

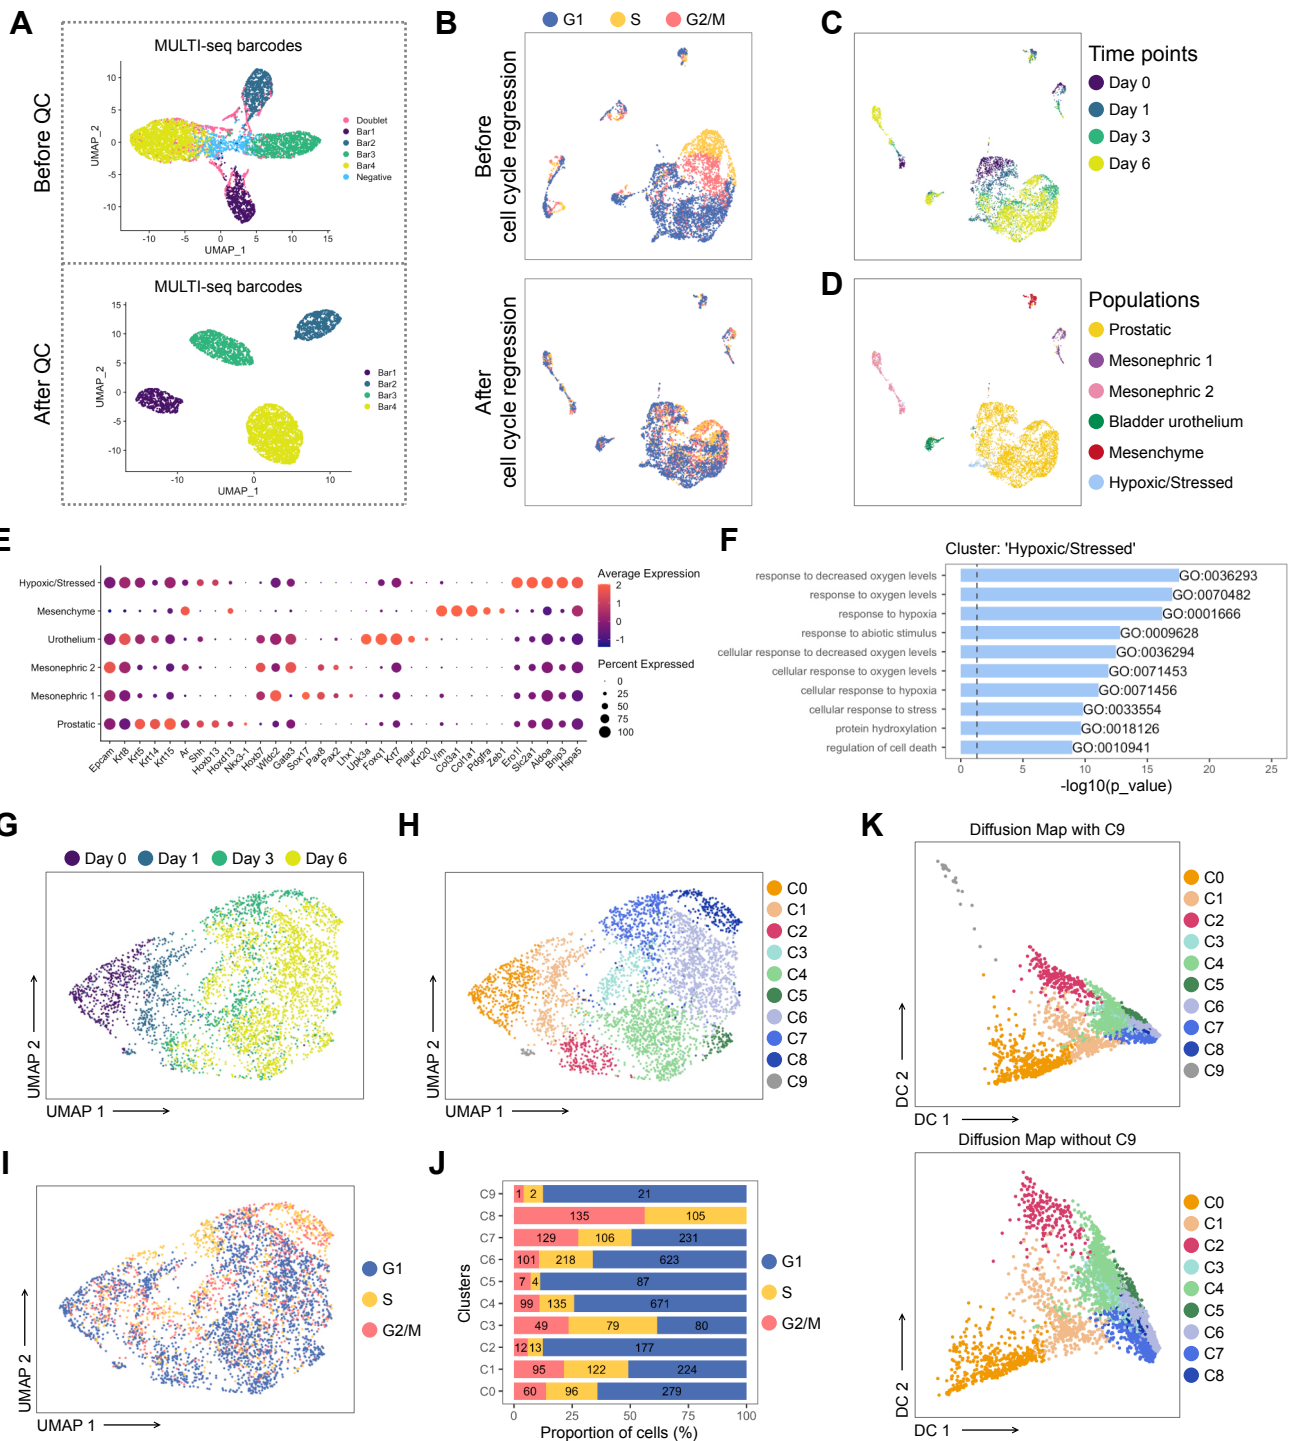

Supplement: supp [file elife-60225-supp-v1.zip]

**A**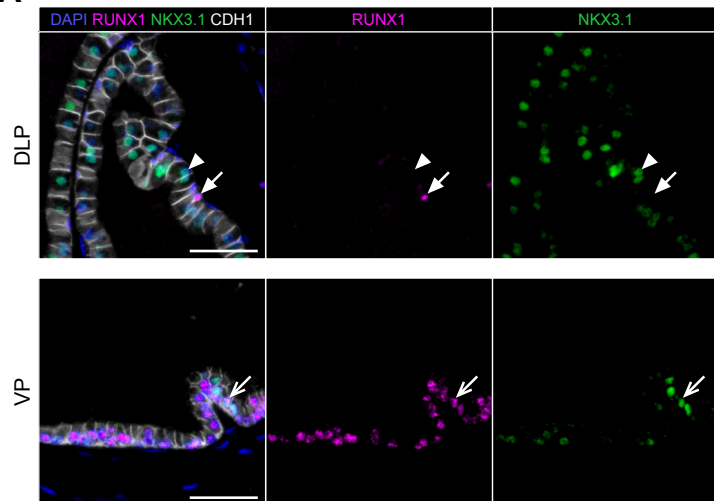**B**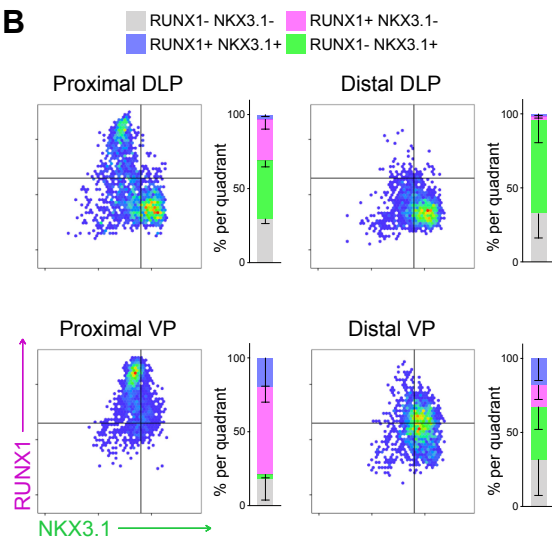**C**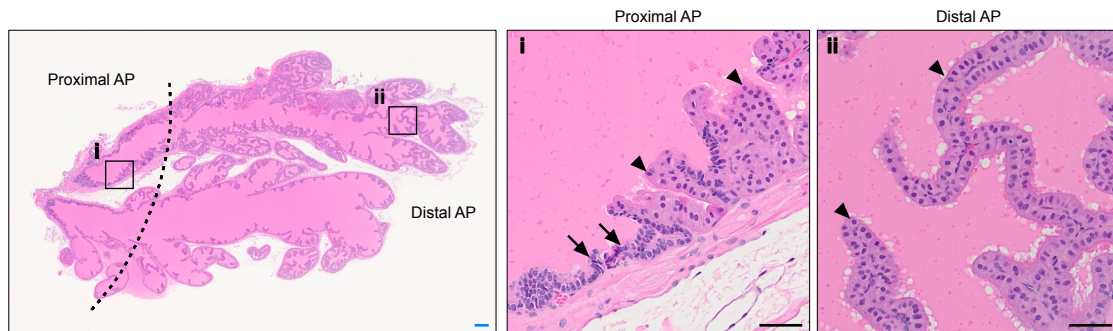

Supplement: supp [file elife-60225-supp-v1.zip]

**A**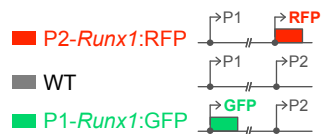**C**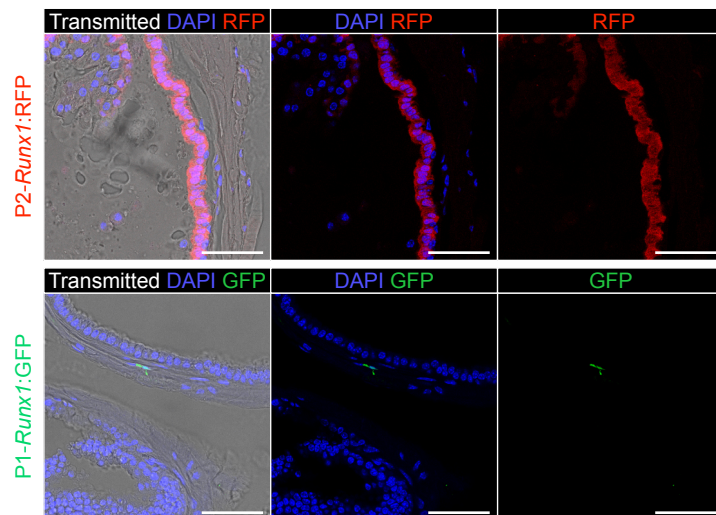**B**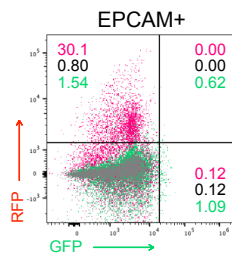**D**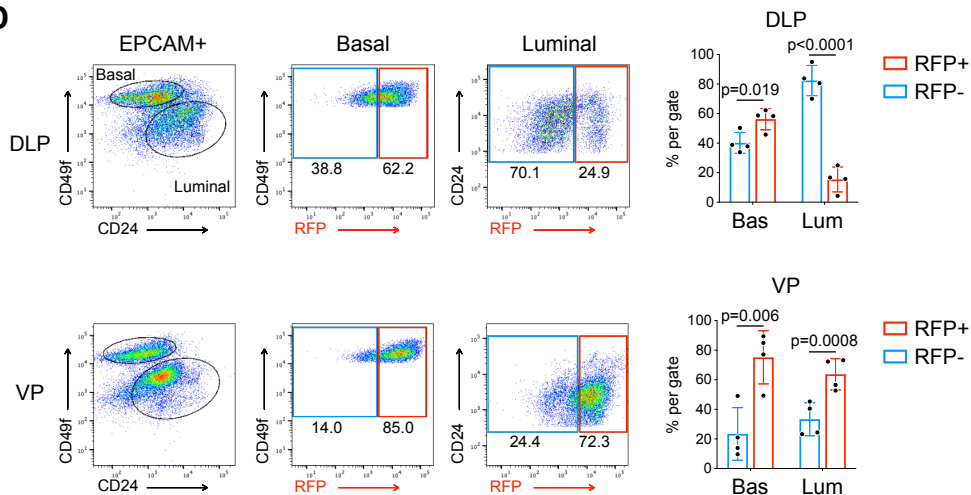

Supplement: supp [file elife-60225-supp-v1.zip]

**A**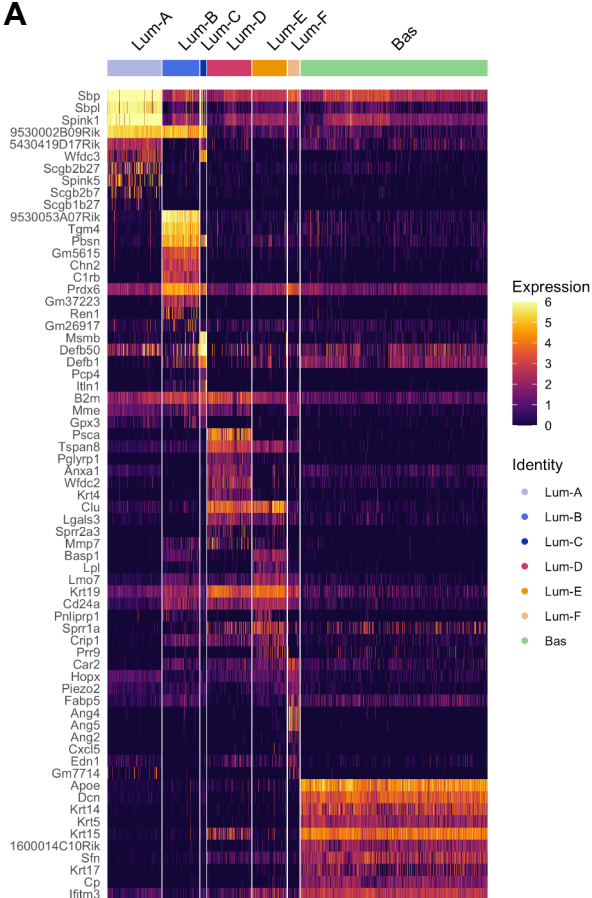**B**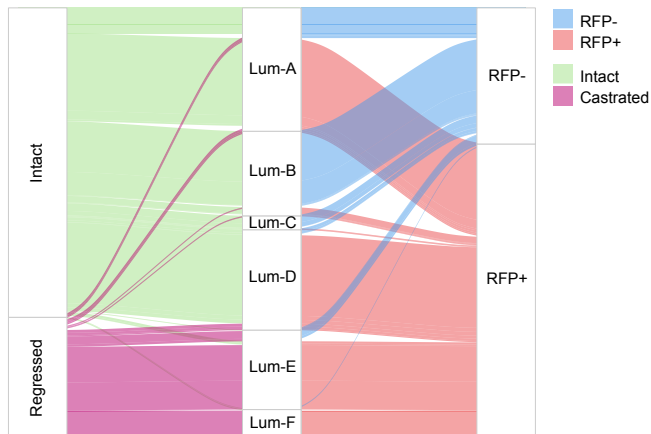**C**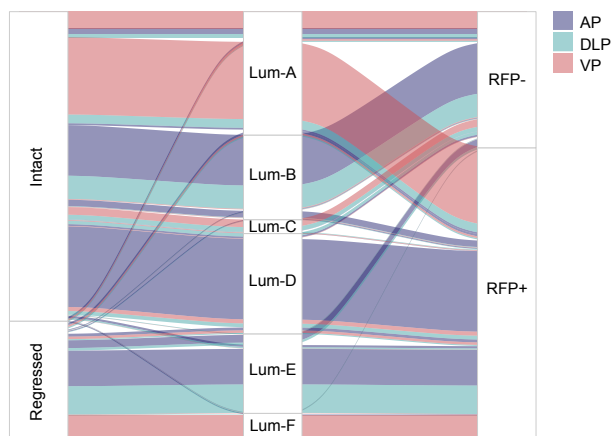**D**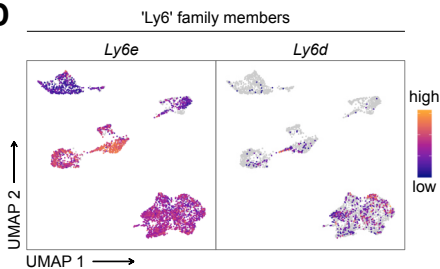**E**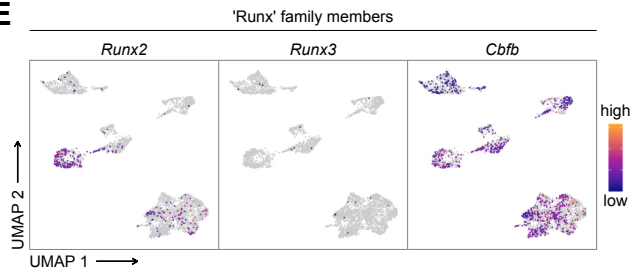

Supplement: supp [file elife-60225-supp-v1.zip]

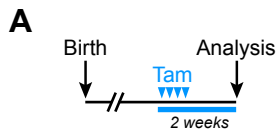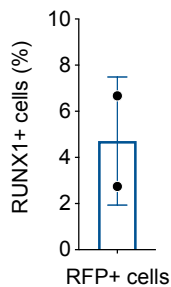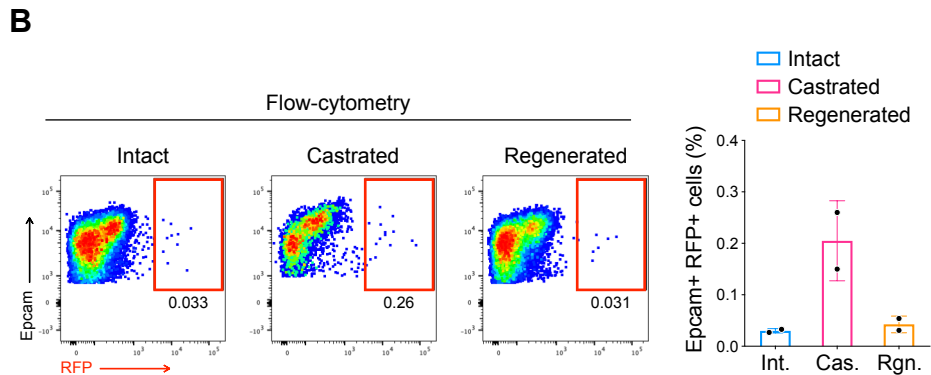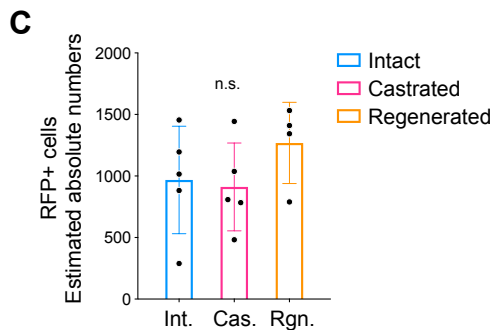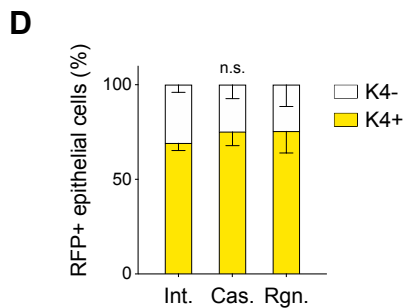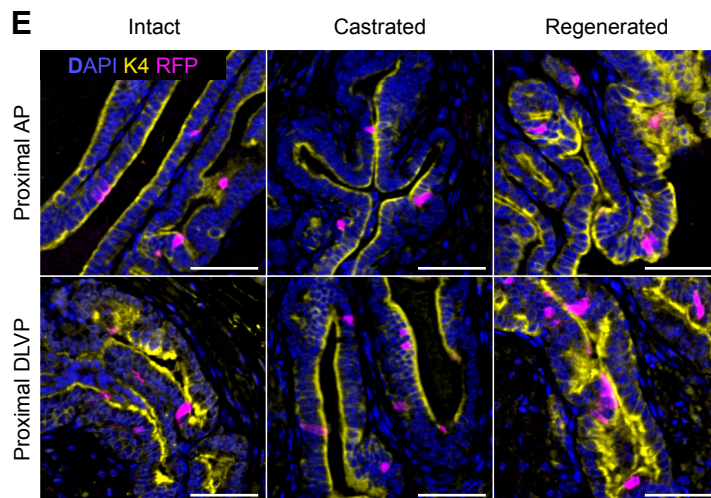

Supplement: supp [file elife-60225-supp-v1.zip]

**A**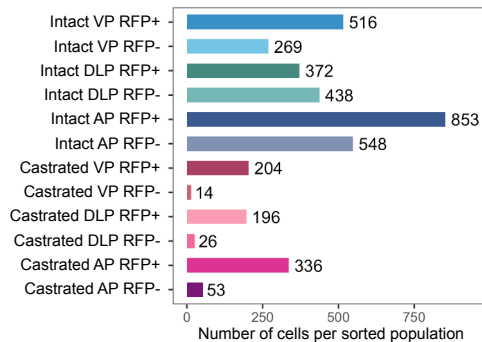**B**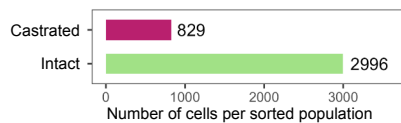**C**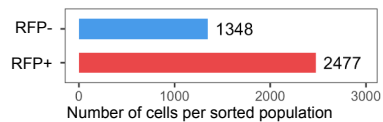**D**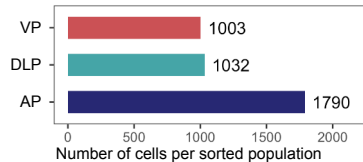**E**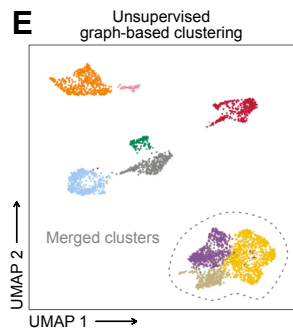**F**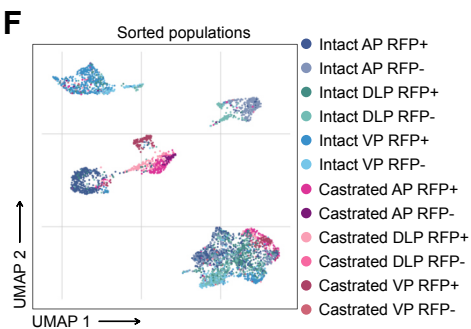**G**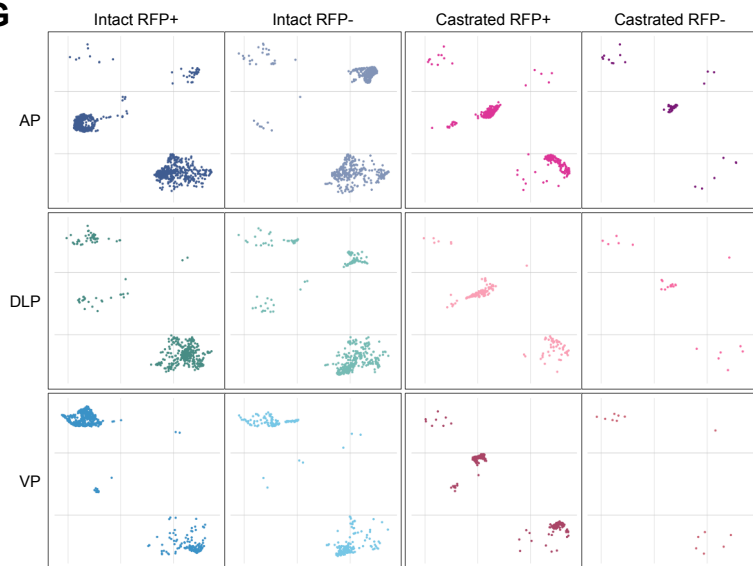**H**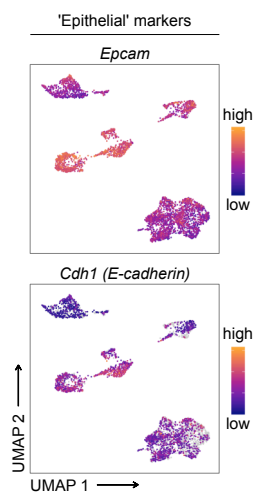**I**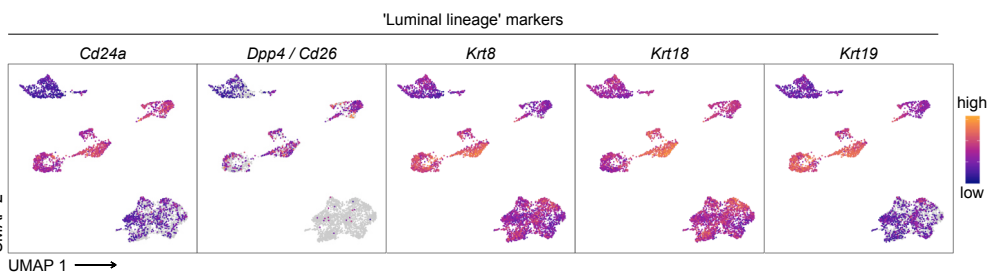**J**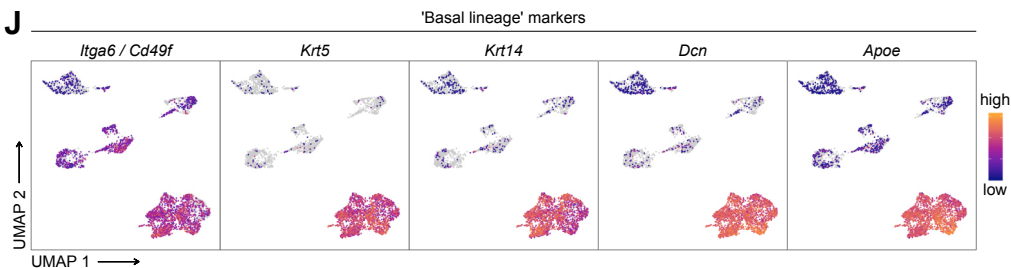

Supplement: supp [file elife-60225-supp-v1.zip]

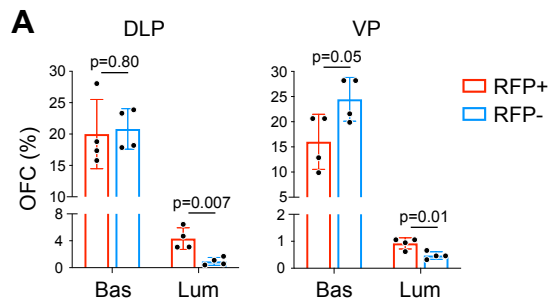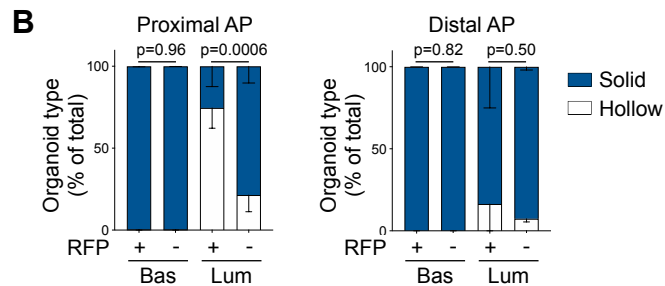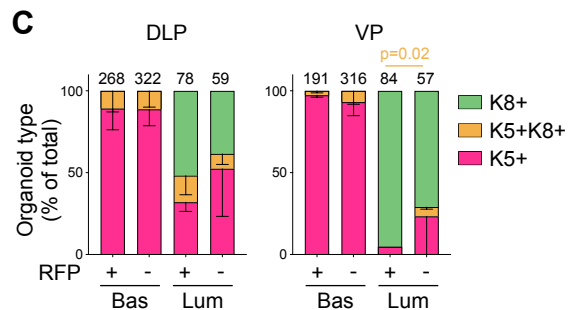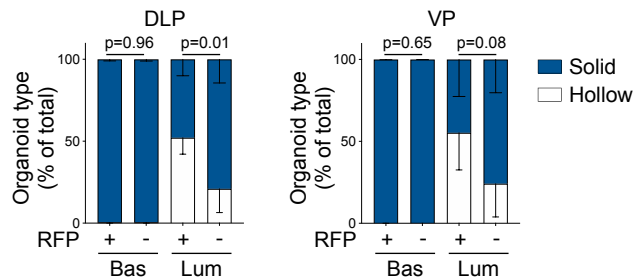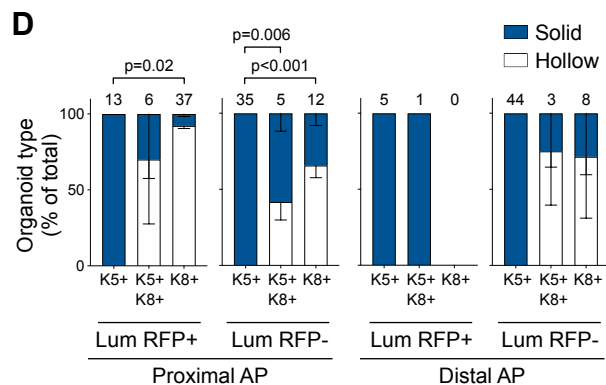

Supplement: supp [file elife-60225-supp-v1.zip]

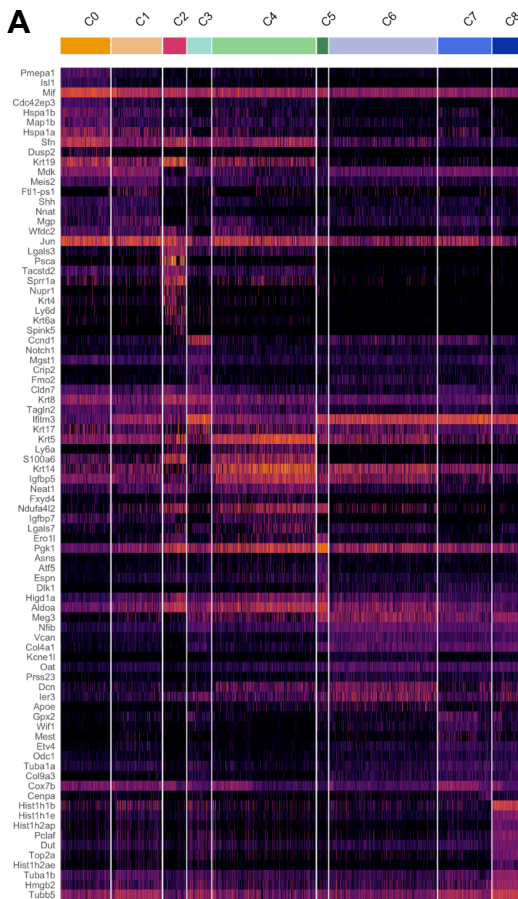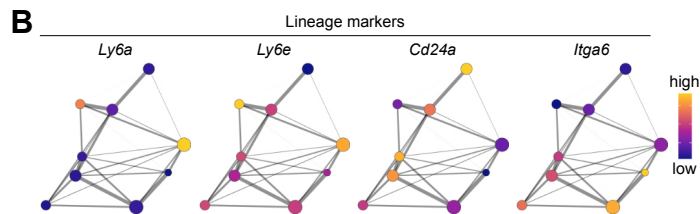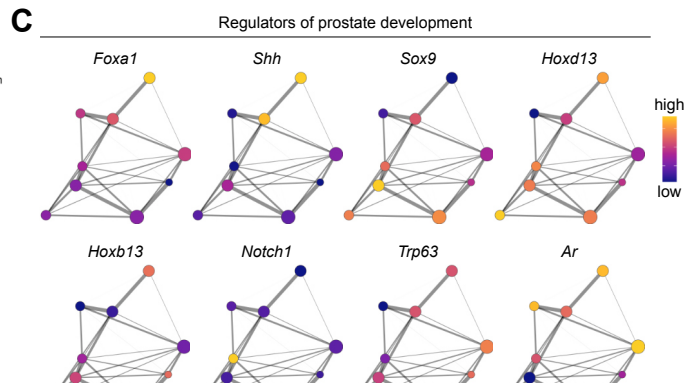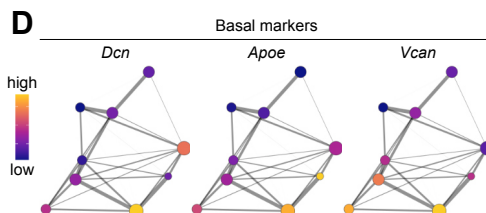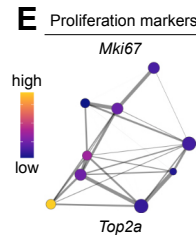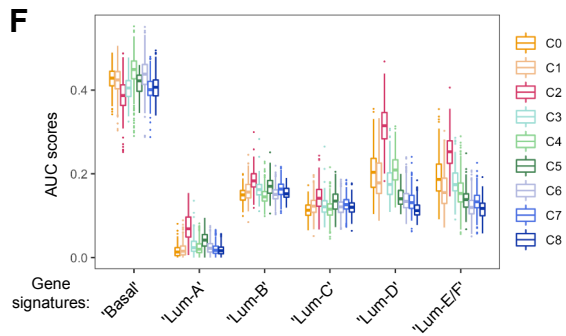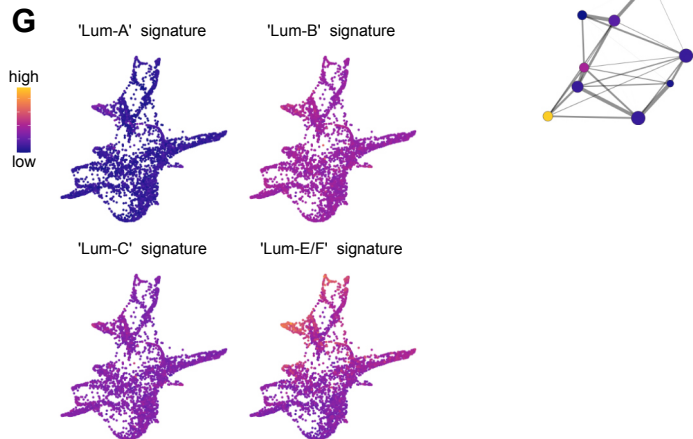

Supplement: supp [file elife-60225-supp-v1.zip]

**A**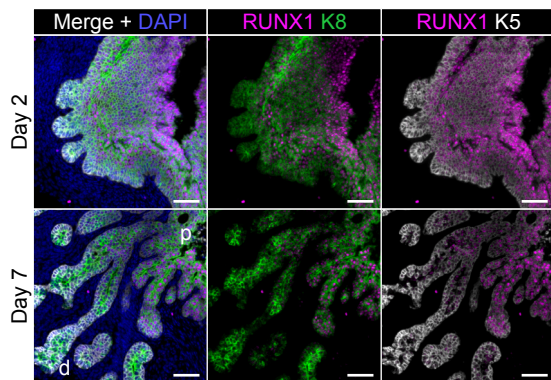**B**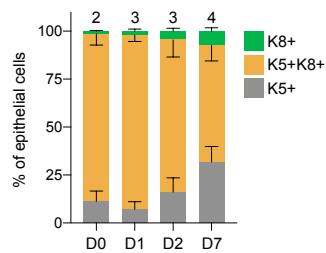**C**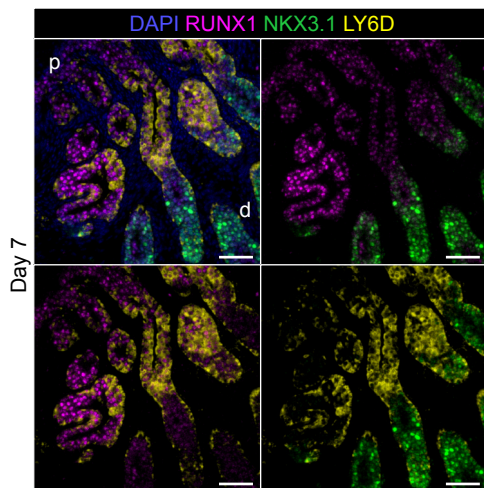**D**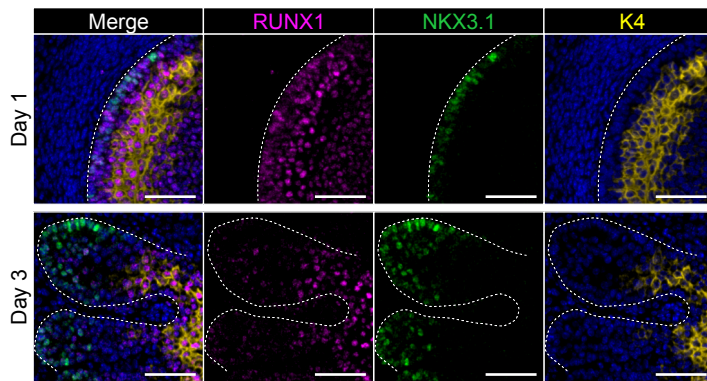**E**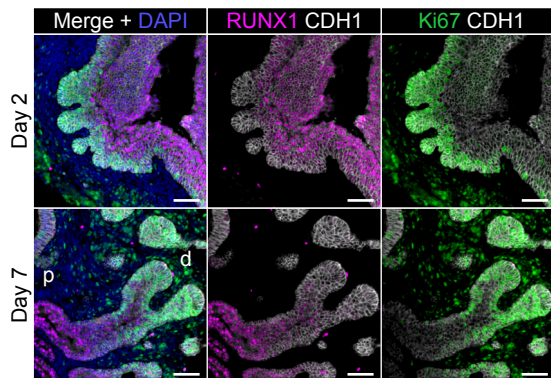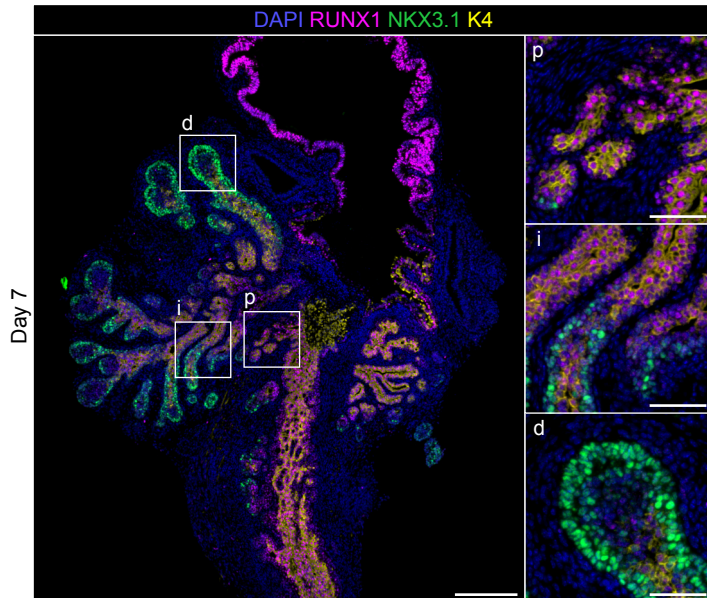

Supplement: supp [file elife-60225-supp-v1.zip]

**A**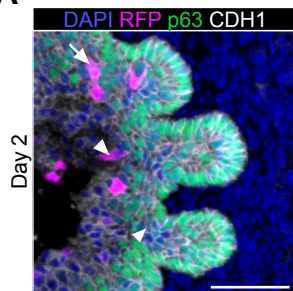**B**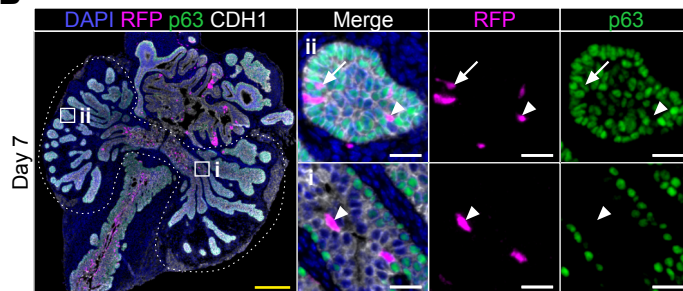**C**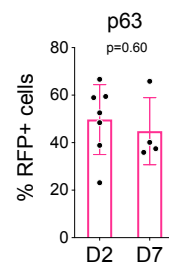**D**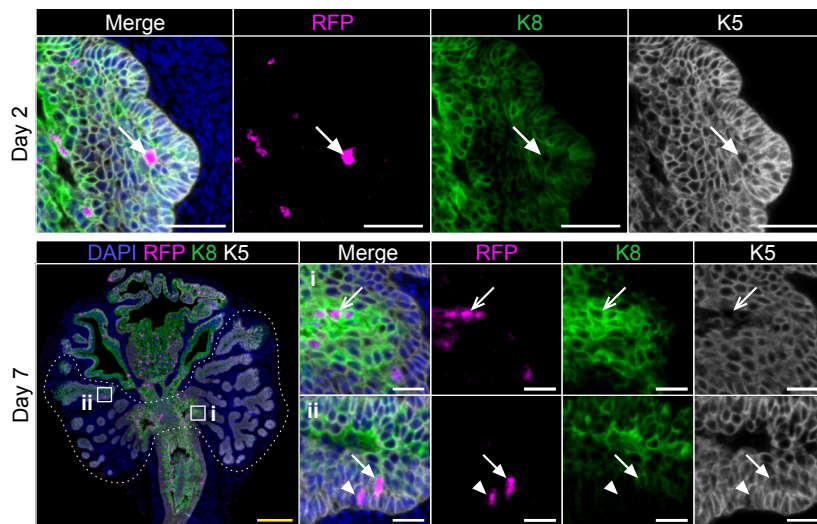**E**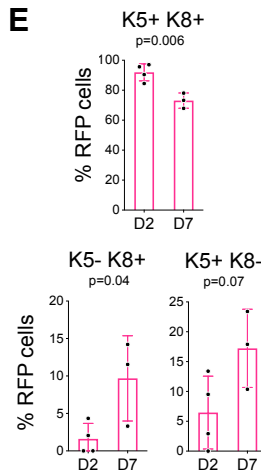**F**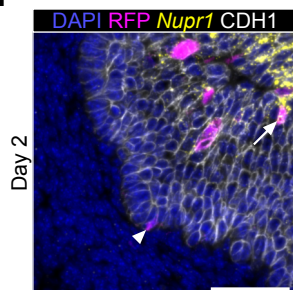**G**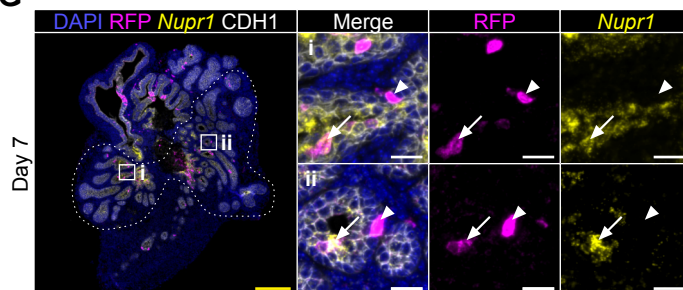**H**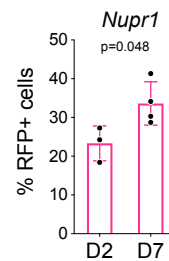

Supplement: supp [file elife-60225-supp-v1.zip]

**A**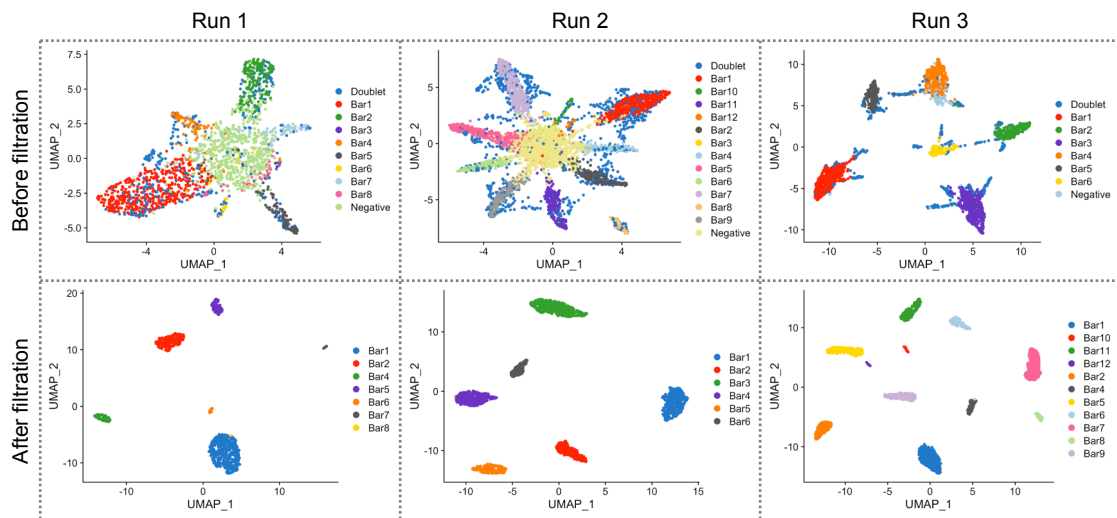**B**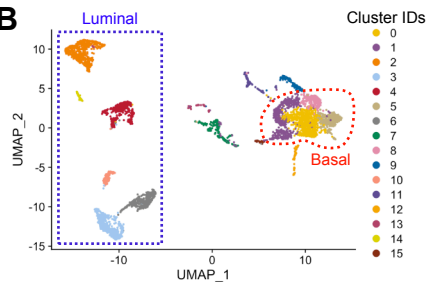**C**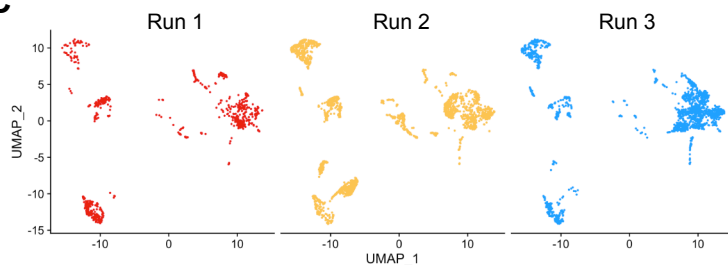**D**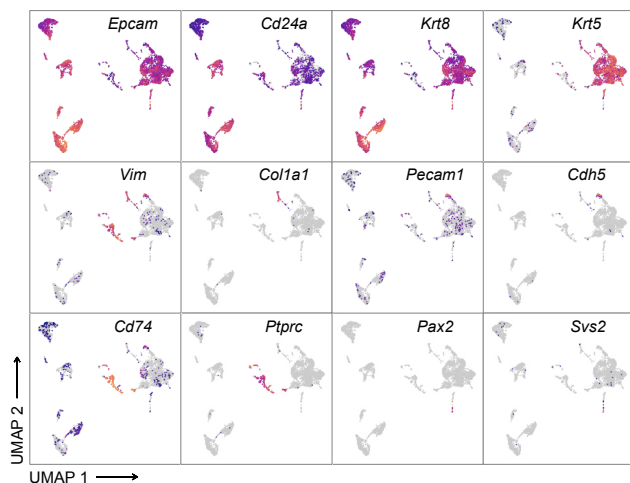**E**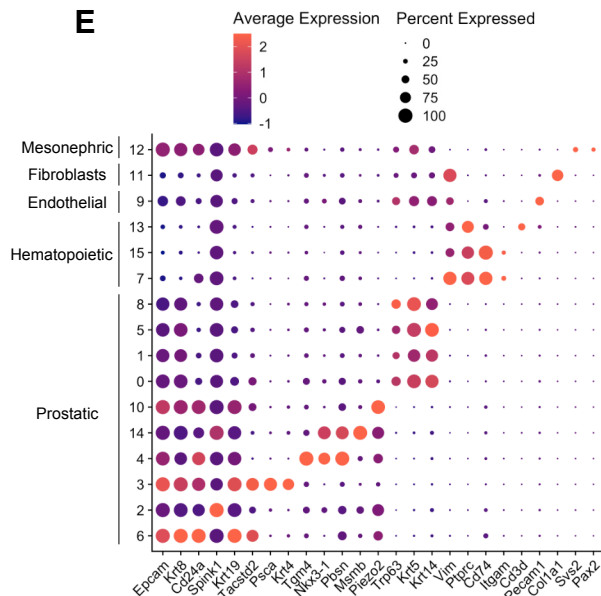

Supplement: supp [file elife-60225-supp-v1.zip]

**A**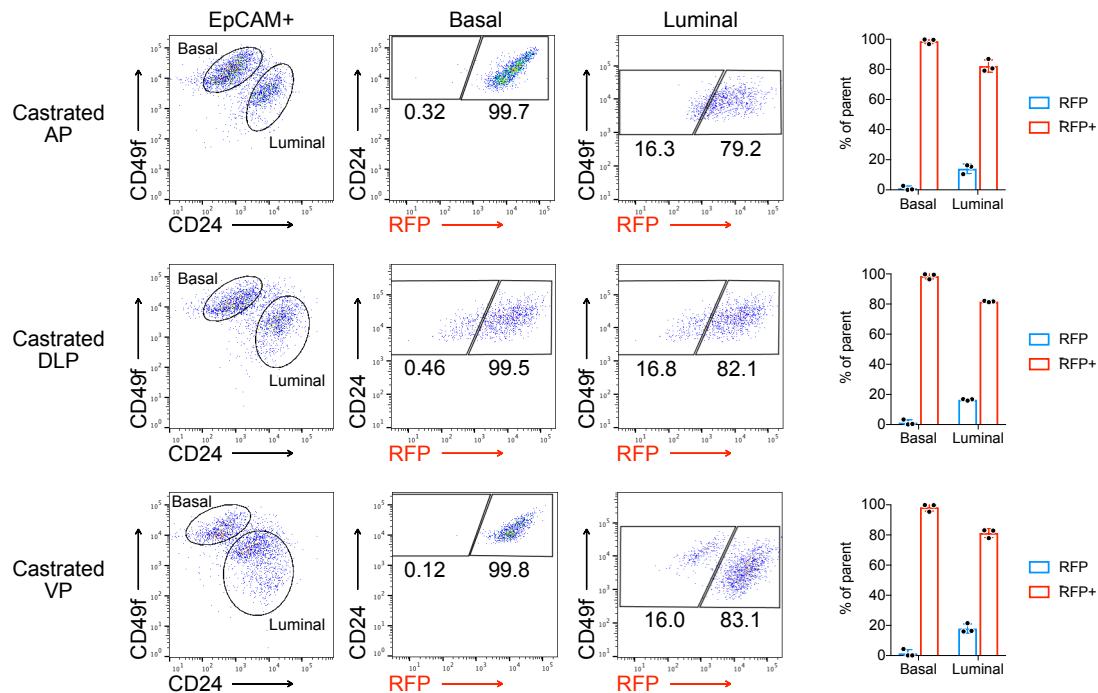**B**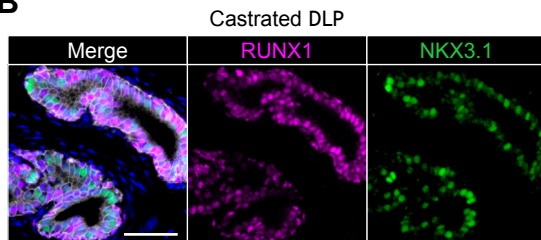**C**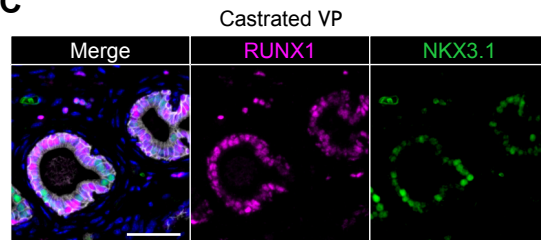

Supplement: supp [file elife-60225-supp-v1.zip › elife_poa_e60225_Figure_2_figure_supplement_1.pdf]

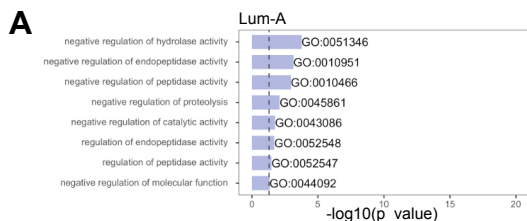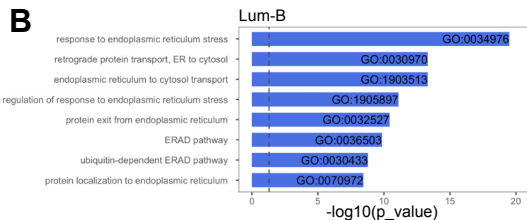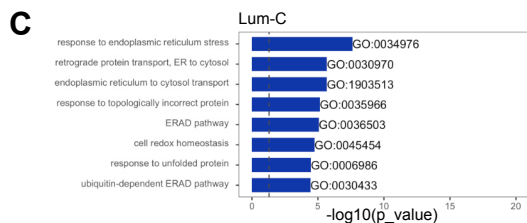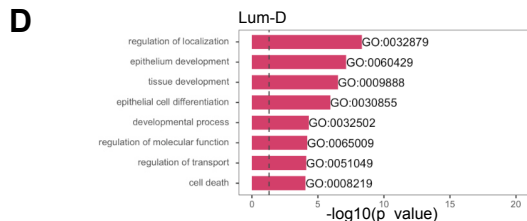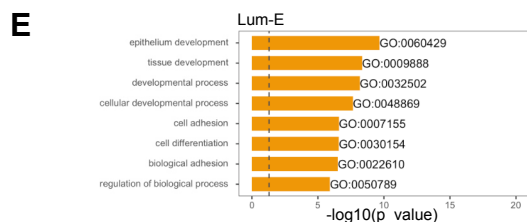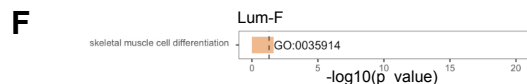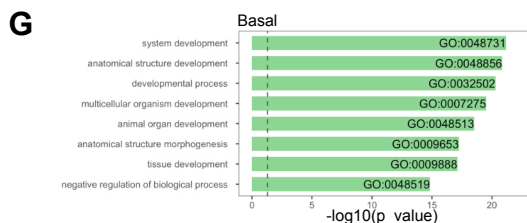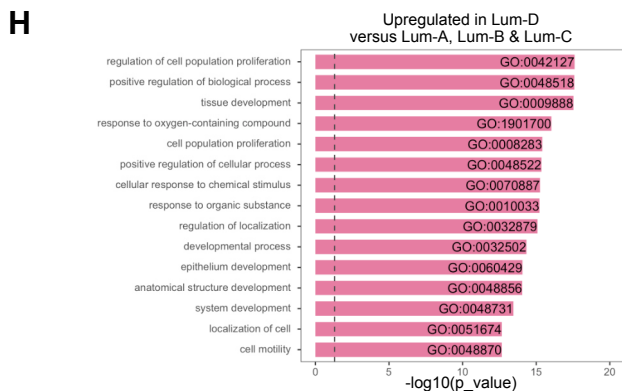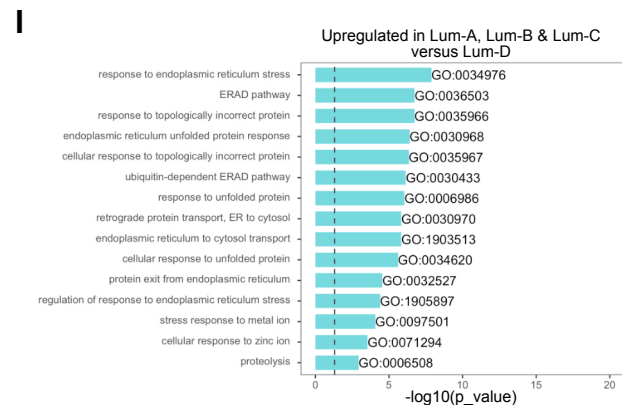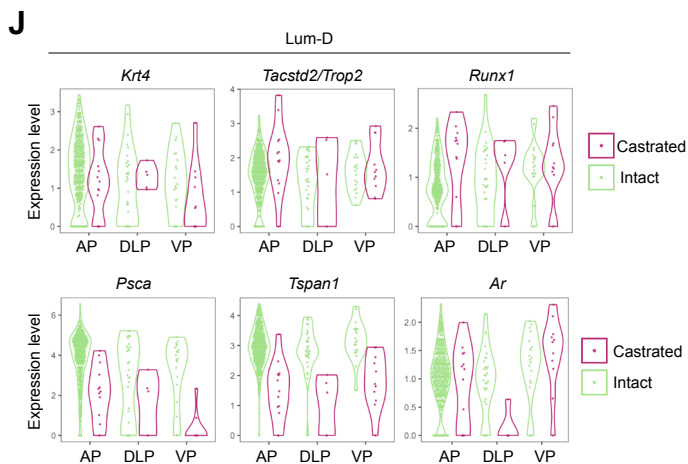

Supplement: supp [file elife-60225-supp-v1.zip › elife_poa_e60225_Figure_3_figure_supplement_4.pdf]

**A**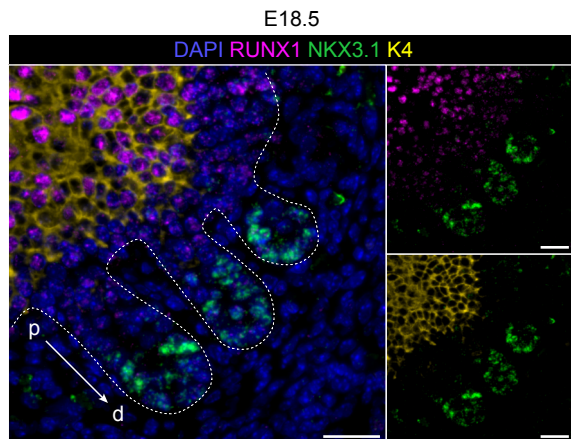**B**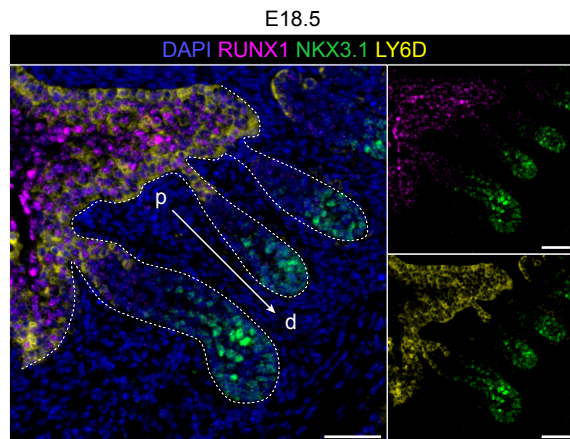**C**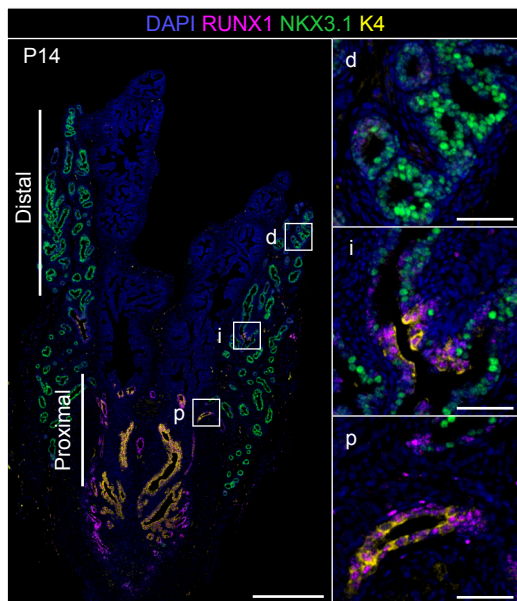**D**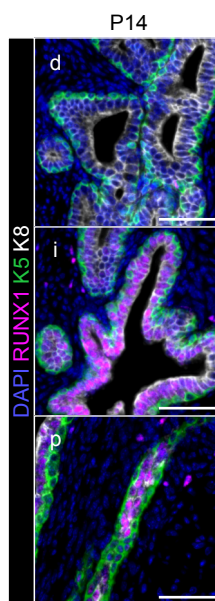**E**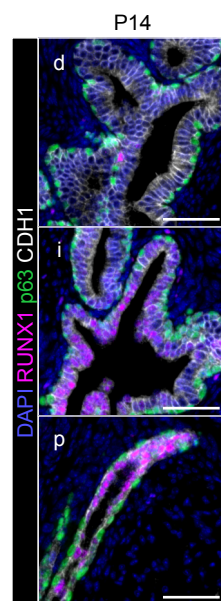

Supplement: supp [file elife-60225-supp-v1.zip › elife_poa_e60225_Figure_5_figure_supplement_1.pdf]
